# Supplementary material for: Accelerated growth increases the somatic epimutation rate in trees
Source: bioRxiv preprint, doi:10.1101/2024.05.07.592680, version 2 (2024-05-16)
Supplement: Supplemental Table 2 [file 592680_file03.xlsx]

## Sheet: DMR_matrix_tree171
seqnames	start	end	WA1-25.3	W1.2A-38	O1.1A-38.5	W1.2-38	AW-25.3	O1.1-A-38.5	O1.1A-39.4	O1A1-30.6	O1.1-A1-37.8	O1-A-36.0
Bhaga_1	37801	37900	1	1	0.5	0.5	1	0.5	0.5	1	0.5	0.5
Bhaga_1	46101	46200	1	0.5	0.5	0.5	1	1	0.5	0.5	1	0.5
Bhaga_1	46201	46300	1	0.5	1	0.5	1	1	1	1	1	1
Bhaga_1	48601	48700	1	1	1	1	1	0.5	0.5	1	0.5	1
Bhaga_1	55001	55100	0.5	1	1	0.5	0.5	1	0.5	1	0.5	0.5
Bhaga_1	56001	56100	0.5	0.5	1	1	0.5	1	1	1	1	0.5
Bhaga_1	56201	56300	0.5	0.5	1	0.5	1	0.5	0.5	1	0.5	1
Bhaga_1	65801	65900	1	0.5	0.5	1	1	1	1	1	1	0.5
Bhaga_1	66401	66500	1	0.5	1	1	0.5	0.5	1	0.5	1	1
Bhaga_1	68001	68100	1	1	0.5	1	0.5	1	0.5	1	0.5	0.5
Bhaga_1	72701	72800	1	1	1	1	1	0.5	0.5	0.5	1	0.5
Bhaga_1	72801	72900	1	1	1	1	1	1	1	0.5	1	0.5
Bhaga_1	73501	73600	0.5	0.5	0.5	0.5	0.5	1	1	0.5	0.5	0.5
Bhaga_1	74501	74600	0.5	0.5	0.5	0.5	0.5	1	0.5	1	1	0.5
Bhaga_1	74601	74700	1	1	1	1	0.5	1	1	0.5	0.5	0.5
Bhaga_1	75001	75100	1	1	1	1	1	1	0.5	1	1	0.5
Bhaga_1	77501	77600	0.5	1	0.5	1	0.5	0.5	1	0.5	0.5	1
Bhaga_1	94701	94800	1	1	0.5	0.5	1	1	1	1	1	0.5
Bhaga_1	103201	103300	0.5	1	1	1	1	0.5	1	1	1	0.5
Bhaga_1	109701	109800	0.5	1	0.5	1	1	0.5	1	1	1	0.5
Bhaga_1	109901	110000	1	1	0.5	0.5	0.5	1	1	1	1	1
Bhaga_1	110001	110100	1	1	0.5	0.5	0.5	1	1	1	1	1
Bhaga_1	111401	111500	0.5	1	1	1	0.5	1	1	1	0.5	1
Bhaga_1	112201	112300	0	0	0.5	0.5	0.5	0	0.5	0.5	0.5	0
Bhaga_1	129001	129100	1	1	0.5	1	1	1	1	1	0.5	1
Bhaga_1	129101	129200	1	1	0.5	1	0.5	0.5	1	0.5	0.5	0.5
Bhaga_1	148501	148600	1	0.5	0.5	0.5	1	1	1	1	1	1
Bhaga_1	148601	148700	1	1	0.5	1	1	1	1	1	1	0.5
Bhaga_1	148701	148800	1	0.5	0.5	0.5	0.5	0.5	1	0.5	0.5	0.5
Bhaga_1	148801	148900	1	0.5	1	0.5	1	0.5	1	1	1	1
Bhaga_1	149001	149100	1	0.5	1	1	1	1	1	0.5	1	1
Bhaga_1	149101	149200	1	0.5	1	0.5	1	0.5	0.5	0.5	1	1
Bhaga_1	149201	149300	1	0.5	1	1	1	1	1	0.5	1	1
Bhaga_1	150901	151000	0.5	0	0.5	0.5	0	0	0.5	0.5	0.5	0.5
Bhaga_1	155601	155700	0.5	1	0.5	1	0.5	0.5	1	1	1	1
Bhaga_1	164101	164200	1	0.5	1	1	1	1	1	0.5	1	1
Bhaga_1	164201	164300	1	0.5	1	1	1	1	1	0.5	1	1
Bhaga_1	168801	168900	1	1	0.5	0.5	1	1	0.5	1	1	0.5
Bhaga_1	169401	169500	1	0.5	0.5	0.5	1	0.5	1	0.5	0.5	0.5
Bhaga_1	169601	169700	1	1	1	0.5	1	1	0.5	0.5	1	1
Bhaga_1	182001	182100	1	0.5	1	0.5	0.5	1	0.5	1	1	1
Bhaga_1	182101	182200	1	0.5	1	0.5	0.5	1	0.5	1	1	1
Bhaga_1	183001	183100	1	0.5	0.5	1	1	1	1	1	1	1
Bhaga_1	187801	187900	1	0.5	1	0.5	0.5	1	1	1	0.5	1
Bhaga_1	187901	188000	1	0.5	1	0.5	0.5	1	1	1	0.5	1
Bhaga_1	191201	191300	0.5	0.5	1	1	1	1	1	0.5	0.5	1
Bhaga_1	192401	192500	0.5	0.5	0	0.5	0.5	0	0	0.5	0	0.5
Bhaga_1	201101	201200	1	1	1	1	1	0.5	1	1	1	0.5
Bhaga_1	210101	210200	0.5	0.5	0.5	0.5	0	0	0	0	0	0
Bhaga_1	210601	210700	0	0	0.5	0	0	0	0	0	0.5	0
Bhaga_1	214701	214800	0.5	0.5	0.5	1	1	0.5	0.5	1	0.5	0.5
Bhaga_1	215301	215400	1	0.5	1	1	0.5	1	1	1	1	1
Bhaga_1	217201	217300	0	0.5	0	0.5	0.5	0	0	0.5	0	0
Bhaga_1	219401	219500	0.5	1	1	1	0.5	0.5	1	1	1	1
Bhaga_1	219501	219600	0.5	1	1	1	0.5	0.5	1	1	1	0.5
Bhaga_1	219601	219700	0.5	1	1	1	0.5	0.5	1	1	1	0.5
Bhaga_1	229601	229700	0.5	1	1	1	1	1	1	0.5	0.5	1
Bhaga_1	231001	231100	0.5	0.5	0.5	1	0.5	0.5	0.5	1	1	0.5
Bhaga_1	236401	236500	1	1	1	1	0.5	0.5	0.5	0.5	1	1
Bhaga_1	250901	251000	0.5	1	1	1	1	0.5	1	1	1	1
Bhaga_1	251101	251200	0.5	1	0.5	1	1	1	1	1	0.5	1
Bhaga_1	254301	254400	0.5	1	0.5	1	0.5	1	1	1	1	1
Bhaga_1	254401	254500	0.5	0.5	0.5	1	0.5	1	1	1	1	0.5
Bhaga_1	254901	255000	0.5	0.5	0.5	1	0.5	0.5	1	0.5	0.5	0.5
Bhaga_1	255101	255200	1	1	1	1	1	1	0.5	0.5	0.5	1
Bhaga_1	257801	257900	1	1	0.5	1	1	1	0.5	1	0.5	1
Bhaga_1	258201	258300	0.5	1	1	1	1	1	1	1	0.5	1
Bhaga_1	262801	262900	0	0	0.5	0	0	0.5	0	0	0.5	0
Bhaga_1	265601	265700	1	1	1	1	0.5	1	1	1	1	0.5
Bhaga_1	265701	265800	1	1	0.5	0.5	0.5	1	1	0.5	1	0.5
Bhaga_1	266001	266100	0	0	0	0	0	0.5	0	0	0	0.5
Bhaga_1	266101	266200	0	0	0	0	0	0.5	0.5	0	0	0.5
Bhaga_1	266201	266300	0	0	0	0	0.5	0.5	0.5	0	0	0.5
Bhaga_1	268401	268500	1	1	1	1	1	1	0.5	0.5	1	1
Bhaga_1	270501	270600	1	1	0.5	0.5	1	1	0.5	1	0.5	0.5
Bhaga_1	272101	272200	1	1	1	1	1	1	0.5	0.5	1	1
Bhaga_1	274701	274800	0.5	1	1	1	1	1	0.5	0.5	1	1
Bhaga_1	274801	274900	0.5	0.5	0.5	0.5	1	1	0.5	0.5	0.5	1
Bhaga_1	282901	283000	1	1	1	1	1	0.5	0.5	0.5	0.5	0.5
Bhaga_1	284001	284100	1	1	1	1	1	1	0.5	1	0.5	0.5
Bhaga_1	284301	284400	1	0.5	0.5	1	1	0.5	1	1	1	1
Bhaga_1	284401	284500	1	0.5	1	1	1	0.5	1	1	1	1
Bhaga_1	284501	284600	1	0.5	1	1	0.5	0.5	1	1	1	1
Bhaga_1	287001	287100	1	1	1	1	0.5	1	1	0.5	0.5	1
Bhaga_1	287901	288000	0.5	1	0.5	0.5	1	1	0.5	0.5	0.5	1
Bhaga_1	288601	288700	1	0.5	1	1	1	1	0.5	0.5	1	0.5
Bhaga_1	288701	288800	1	1	1	0.5	1	0.5	1	1	0.5	0.5
Bhaga_1	289301	289400	0.5	0.5	1	0.5	0.5	1	0.5	0.5	0.5	0.5
Bhaga_1	293501	293600	0.5	0.5	0.5	1	0.5	1	1	1	1	0.5
Bhaga_1	294101	294200	0	0.5	0	0	0	0	0	0	0	0
Bhaga_1	294601	294700	0.5	1	0.5	1	1	1	0.5	0.5	0.5	1
Bhaga_1	297301	297400	0	0.5	0	0.5	0.5	0	0.5	0.5	0.5	0.5
Bhaga_1	316601	316700	0.5	0.5	0.5	0.5	1	1	1	1	1	1
Bhaga_1	318101	318200	1	0.5	1	1	0.5	1	1	1	1	0.5
Bhaga_1	319101	319200	0.5	1	0.5	1	1	0.5	0.5	1	0.5	0.5
Bhaga_1	323501	323600	0.5	1	0.5	0.5	1	0.5	0.5	0.5	1	0.5
Bhaga_1	323601	323700	0.5	1	0.5	0.5	1	0.5	0.5	0.5	1	0.5
Bhaga_1	323701	323800	0.5	1	0.5	0.5	1	0.5	1	0.5	1	0.5
Bhaga_1	325701	325800	0.5	0.5	0.5	1	0.5	0.5	1	0.5	0.5	0.5
Bhaga_1	325801	325900	1	1	1	1	0.5	0.5	1	0.5	0.5	1
Bhaga_1	331501	331600	0.5	1	1	1	0.5	1	1	0.5	1	0.5
Bhaga_1	331601	331700	0.5	1	0.5	1	0.5	1	1	0.5	1	0.5
Bhaga_1	331701	331800	0.5	1	0.5	1	0.5	1	1	0.5	1	1
Bhaga_1	336901	337000	0.5	0.5	0	0	0.5	0	0	0	0.5	0.5
Bhaga_1	343301	343400	0.5	0.5	1	1	1	0.5	0.5	0.5	0.5	0.5
Bhaga_1	345501	345600	1	1	1	1	1	1	0.5	0.5	1	0.5
Bhaga_1	345601	345700	1	1	1	1	1	0.5	0.5	1	1	0.5
Bhaga_1	346901	347000	1	1	0.5	1	1	1	1	1	1	1
Bhaga_1	348901	349000	0.5	0.5	1	1	1	0.5	1	1	1	1
Bhaga_1	353001	353100	0.5	0.5	0.5	0.5	0.5	1	0.5	0.5	1	1
Bhaga_1	353901	354000	1	1	1	1	0.5	1	1	1	0.5	0.5
Bhaga_1	355201	355300	1	1	0.5	1	1	0.5	0.5	1	1	1
Bhaga_1	355801	355900	1	1	1	1	1	0.5	0.5	0.5	1	1
Bhaga_1	373501	373600	1	1	1	1	1	1	1	0.5	0.5	1
Bhaga_1	379801	379900	0.5	0.5	1	1	1	1	1	1	1	1
Bhaga_1	384401	384500	0.5	1	0.5	0.5	1	0.5	1	0.5	1	0.5
Bhaga_1	395801	395900	0	0	0	0	0	0	0.5	0.5	0.5	0
Bhaga_1	396101	396200	1	0.5	1	1	1	1	0.5	1	1	1
Bhaga_1	398101	398200	0.5	0.5	1	1	0.5	0.5	1	1	1	1
Bhaga_1	398201	398300	1	0.5	1	1	1	1	1	1	1	1
Bhaga_1	405901	406000	0.5	0.5	0.5	1	1	0.5	0.5	1	1	0.5
Bhaga_1	413701	413800	0	0.5	0.5	0.5	0.5	0.5	0	0	0.5	0.5
Bhaga_1	415301	415400	1	1	0.5	0.5	0.5	1	0.5	1	0.5	1
Bhaga_1	415401	415500	1	1	0.5	0.5	0.5	0.5	0.5	1	0.5	1
Bhaga_1	415701	415800	0	0.5	0.5	0	0.5	0	0.5	0.5	0.5	0.5
Bhaga_1	415801	415900	0	0.5	0.5	0	0.5	0	0	0.5	0	0.5
Bhaga_1	415901	416000	0	0.5	0.5	0	0	0	0.5	0.5	0	0.5
Bhaga_1	416801	416900	0	0	0.5	0	0	0	0	0	0.5	0
Bhaga_1	420501	420600	1	0.5	0.5	1	0.5	0.5	1	1	0.5	1
Bhaga_1	426701	426800	0.5	0.5	1	0.5	1	1	0.5	1	0.5	1
Bhaga_1	427301	427400	0.5	0.5	0.5	0.5	1	1	1	1	0.5	1
Bhaga_1	428101	428200	1	0.5	1	1	1	1	1	1	1	0.5
Bhaga_1	428801	428900	0.5	1	1	0.5	0.5	0.5	0.5	1	0.5	1
Bhaga_1	429501	429600	1	0.5	0.5	0.5	1	1	1	0.5	0.5	0.5
Bhaga_1	430401	430500	1	1	0.5	1	1	1	0.5	1	1	1
Bhaga_1	431101	431200	0.5	1	1	1	1	1	1	1	0.5	1
Bhaga_1	432201	432300	1	1	1	0.5	0.5	0.5	0.5	1	1	0.5
Bhaga_1	433501	433600	1	0.5	1	1	1	0.5	0.5	0.5	1	1
Bhaga_1	434601	434700	0.5	1	1	1	1	0.5	0.5	1	1	1
Bhaga_1	435501	435600	1	1	1	1	1	1	1	0.5	1	0.5
Bhaga_1	438501	438600	1	0.5	0.5	0.5	0.5	1	0.5	0.5	0.5	1
Bhaga_1	450201	450300	0.5	1	0.5	0.5	1	1	1	1	0.5	0.5
Bhaga_1	451801	451900	1	1	0.5	1	1	1	0.5	1	1	1
Bhaga_1	457601	457700	0	0	0	0	0.5	0	0.5	0	0	0.5
Bhaga_1	458601	458700	0.5	1	1	1	1	0.5	1	1	1	1
Bhaga_1	466901	467000	0	0.5	0	0	0.5	0	0	0	0	0
Bhaga_1	469301	469400	1	1	1	1	0.5	1	0.5	0.5	1	1
Bhaga_1	488001	488100	1	1	1	1	0.5	1	0.5	1	1	0.5
Bhaga_1	488201	488300	1	1	0.5	0.5	0.5	1	1	1	0.5	1
Bhaga_1	489401	489500	0	0	0.5	0	0	0.5	0	0	0.5	0
Bhaga_1	493601	493700	0.5	0.5	0.5	1	1	1	1	1	1	1
Bhaga_1	496101	496200	0.5	0.5	0.5	1	1	1	1	1	1	1
Bhaga_1	496801	496900	0	0	0	0.5	0	0	0	0.5	0	0
Bhaga_1	504301	504400	1	1	1	1	1	1	1	1	0.5	1
Bhaga_1	508001	508100	0.5	0	0	0.5	0.5	0.5	0.5	0.5	0.5	0
Bhaga_1	515101	515200	1	1	1	0.5	0.5	1	0.5	1	1	1
Bhaga_1	515301	515400	1	0.5	1	1	0.5	0.5	1	1	1	0.5
Bhaga_1	524001	524100	0.5	1	0.5	1	1	1	0.5	1	1	1
Bhaga_1	527801	527900	1	1	1	1	1	1	1	0.5	0.5	1
Bhaga_1	528001	528100	1	1	0.5	1	1	0.5	0.5	0.5	0.5	1
Bhaga_1	531901	532000	0.5	0	0.5	0.5	0	0	0.5	0	0	0
Bhaga_1	543501	543600	1	1	1	1	1	1	1	0.5	1	1
Bhaga_1	543801	543900	0.5	1	0.5	1	1	1	0.5	0.5	1	1
Bhaga_1	546901	547000	0.5	0.5	0.5	1	1	1	1	0.5	0.5	0.5
Bhaga_1	547001	547100	0.5	0.5	0.5	1	1	1	0.5	1	0.5	1
Bhaga_1	549001	549100	1	0.5	0.5	0.5	1	0.5	1	1	0.5	0.5
Bhaga_1	549101	549200	0	0	0.5	0	0	0.5	0.5	0	0.5	0.5
Bhaga_1	549301	549400	0.5	0	0.5	0	0	0.5	0	0.5	0.5	0
Bhaga_1	549401	549500	0	0	0.5	0	0	0.5	0	0.5	0	0
Bhaga_1	549501	549600	0	0	0.5	0.5	0	0.5	0.5	0.5	0	0.5
Bhaga_1	550201	550300	0	0	0	0	0.5	0	0	0	0	0.5
Bhaga_1	551601	551700	1	1	1	1	1	1	1	1	1	0.5
Bhaga_1	556401	556500	0	0	0.5	0	0	0	0	0	0	0
Bhaga_1	569501	569600	1	1	0.5	0.5	1	1	1	1	0.5	1
Bhaga_1	569901	570000	1	1	0.5	0.5	1	1	1	1	1	0.5
Bhaga_1	574001	574100	0.5	0	0	0.5	0	0.5	0	0	0	0
Bhaga_1	576401	576500	0	0.5	0	0.5	0	0.5	0	0.5	0.5	0.5
Bhaga_1	576701	576800	1	0.5	1	1	1	0.5	1	1	1	1
Bhaga_1	576801	576900	1	0.5	1	1	1	0.5	1	1	1	1
Bhaga_1	576901	577000	0.5	0.5	0.5	1	1	0.5	0.5	0.5	0.5	1
Bhaga_1	577901	578000	0.5	0.5	0	0	0.5	0.5	0	0.5	0	0
Bhaga_1	578001	578100	0.5	0.5	0.5	0.5	0.5	0.5	0.5	0.5	0	0.5
Bhaga_1	578101	578200	0.5	0.5	0.5	0.5	0.5	0.5	0.5	0.5	0	0.5
Bhaga_1	578801	578900	1	1	1	1	1	0.5	1	0.5	1	0.5
Bhaga_1	578901	579000	1	1	0.5	1	1	0.5	1	1	1	0.5
Bhaga_1	583801	583900	1	1	1	1	1	0.5	1	1	1	0.5
Bhaga_1	587201	587300	0.5	0.5	1	1	0.5	0.5	0.5	1	1	1
Bhaga_1	588401	588500	1	1	1	1	0.5	1	1	1	0.5	1
Bhaga_1	593901	594000	0.5	0.5	1	0.5	0.5	1	1	1	1	1
Bhaga_1	594001	594100	0.5	0.5	1	0.5	0.5	1	0.5	0.5	1	0.5
Bhaga_1	594101	594200	0.5	0.5	1	0.5	0.5	1	0.5	0.5	1	0.5
Bhaga_1	594601	594700	1	1	1	1	0.5	0.5	0.5	1	1	0.5
Bhaga_1	594701	594800	0.5	0.5	1	0.5	0.5	1	0.5	1	1	1
Bhaga_1	595101	595200	0.5	0.5	0.5	1	1	1	0.5	1	0.5	0.5
Bhaga_1	605601	605700	1	0.5	0.5	1	0.5	1	0.5	1	1	0.5
Bhaga_1	605701	605800	0	0.5	0.5	0	0	0.5	0.5	0	0.5	0.5
Bhaga_1	605801	605900	0	0.5	0.5	0	0	0.5	0.5	0	0.5	0.5
Bhaga_1	612001	612100	0.5	0.5	0.5	1	0.5	0.5	1	0.5	0.5	0.5
Bhaga_1	612101	612200	0.5	0.5	0.5	1	0.5	0.5	1	0.5	0.5	0.5
Bhaga_1	612801	612900	1	1	0.5	1	0.5	1	1	0.5	0.5	0.5
Bhaga_1	613001	613100	0.5	0.5	1	1	0.5	0.5	1	0.5	0.5	1
Bhaga_1	613501	613600	1	1	1	1	1	0.5	1	1	1	0.5
Bhaga_1	617201	617300	1	0.5	1	1	0.5	1	1	1	0.5	0.5
Bhaga_1	618201	618300	0.5	0.5	0.5	1	0.5	1	0.5	1	1	0.5
Bhaga_1	618901	619000	0	0	0	0.5	0.5	0.5	0.5	0.5	0.5	0
Bhaga_1	623001	623100	0.5	0.5	0.5	1	0.5	0.5	0.5	1	1	0.5
Bhaga_1	624001	624100	0	0	0	0.5	0	0	0	0	0.5	0.5
Bhaga_1	627001	627100	0.5	0.5	0.5	0.5	0.5	0.5	0.5	1	0.5	0.5
Bhaga_1	627601	627700	0.5	0	0.5	0.5	0	0	0.5	0	0.5	0.5
Bhaga_1	634101	634200	0	0	0.5	0.5	0.5	0	0.5	0	0.5	0.5
Bhaga_1	635001	635100	1	0.5	1	0.5	1	0.5	1	0.5	1	1
Bhaga_1	635201	635300	1	0.5	1	0.5	1	1	1	1	1	1
Bhaga_1	635301	635400	1	0.5	1	0.5	1	0.5	1	0.5	1	1
Bhaga_1	637301	637400	0.5	0.5	0.5	0.5	1	1	0.5	0.5	1	0.5
Bhaga_1	641401	641500	0.5	0.5	0.5	0	0	0.5	0.5	0	0.5	0.5
Bhaga_1	651101	651200	1	1	1	0.5	0.5	1	1	1	1	1
Bhaga_1	651301	651400	1	1	1	0.5	1	0.5	0.5	1	0.5	0.5
Bhaga_1	651701	651800	0.5	1	0.5	1	0.5	1	1	1	1	0.5
Bhaga_1	652001	652100	1	1	0.5	1	1	1	0.5	0.5	0.5	0.5
Bhaga_1	654201	654300	1	0.5	1	0.5	1	1	1	1	0.5	1
Bhaga_1	660601	660700	0.5	0.5	1	0.5	0.5	0.5	0.5	0.5	1	0.5
Bhaga_1	660701	660800	1	1	1	0.5	1	1	0.5	0.5	1	1
Bhaga_1	663601	663700	1	1	1	0.5	1	0.5	1	1	1	1
Bhaga_1	670701	670800	0.5	0.5	0.5	0	0	0.5	0	0.5	0.5	0.5
Bhaga_1	685201	685300	0.5	0.5	0	0.5	0	0.5	0.5	0.5	0.5	0.5
Bhaga_1	692001	692100	0.5	1	1	0.5	1	1	0.5	0.5	1	1
Bhaga_1	693201	693300	1	1	1	1	0.5	0.5	1	1	0.5	1
Bhaga_1	693301	693400	1	1	1	1	0.5	1	1	1	0.5	1
Bhaga_1	693801	693900	1	0.5	1	0.5	0.5	1	1	1	1	1
Bhaga_1	700201	700300	0.5	0.5	1	1	0.5	0.5	1	0.5	1	0.5
Bhaga_1	700301	700400	0.5	0.5	1	1	1	0.5	1	0.5	0.5	1
Bhaga_1	703401	703500	0.5	0.5	0	0.5	0.5	0.5	0.5	0	0	0.5
Bhaga_1	703801	703900	1	1	1	0.5	0.5	0.5	0.5	0.5	0.5	0.5
Bhaga_1	703901	704000	1	1	1	0.5	0.5	0.5	0.5	0.5	0.5	1
Bhaga_1	706701	706800	0	0	0.5	0.5	0.5	0.5	0.5	0.5	0.5	0
Bhaga_1	708101	708200	1	0.5	0.5	0.5	0.5	0.5	1	0.5	1	0.5
Bhaga_1	708201	708300	0	0.5	0.5	0	0	0.5	0.5	0	0	0.5
Bhaga_1	708901	709000	0	0	0.5	0	0.5	0	0.5	0.5	0	0
Bhaga_1	716301	716400	0.5	1	1	0.5	0.5	1	1	0.5	1	1
Bhaga_1	722001	722100	1	0.5	1	0.5	0.5	0.5	1	1	1	0.5
Bhaga_1	722801	722900	1	0.5	0.5	0.5	1	0.5	1	1	0.5	1
Bhaga_1	725601	725700	0.5	1	0.5	1	1	1	0.5	1	0.5	1
Bhaga_1	728001	728100	0.5	0.5	1	1	0.5	1	0.5	0.5	0.5	0.5
Bhaga_1	728401	728500	0.5	0.5	1	0.5	0.5	1	1	0.5	1	0.5
Bhaga_1	728601	728700	0.5	0.5	0.5	1	0.5	0.5	1	1	0.5	0.5
Bhaga_1	728701	728800	0.5	0.5	0.5	1	0.5	0.5	1	1	1	0.5
Bhaga_1	728801	728900	0.5	0.5	0.5	0.5	0.5	0.5	1	1	0.5	0.5
Bhaga_1	730601	730700	0.5	1	0.5	1	0.5	0.5	1	1	1	1
Bhaga_1	734901	735000	0.5	0.5	1	1	0.5	0.5	0.5	0.5	0.5	1
Bhaga_1	740301	740400	1	1	1	1	0.5	1	1	1	0.5	1
Bhaga_1	740401	740500	1	0.5	1	1	0.5	1	1	1	0.5	0.5
Bhaga_1	740501	740600	0.5	0.5	1	1	0.5	0.5	1	1	0.5	0.5
Bhaga_1	740601	740700	0.5	0.5	1	1	1	0.5	0.5	1	1	0.5
Bhaga_1	740701	740800	0.5	1	1	1	1	0.5	0.5	1	1	1
Bhaga_1	740901	741000	1	1	1	1	1	0.5	0.5	0.5	1	1
Bhaga_1	741001	741100	1	1	0.5	1	0.5	0.5	0.5	0.5	1	1
Bhaga_1	741101	741200	1	1	0.5	1	0.5	1	0.5	1	1	1
Bhaga_1	749101	749200	1	1	1	1	1	1	1	1	1	0.5
Bhaga_1	750701	750800	1	1	0.5	1	1	1	1	1	1	1
Bhaga_1	752001	752100	1	1	0.5	1	0.5	0.5	1	1	1	1
Bhaga_1	752101	752200	1	1	0.5	1	0.5	0.5	1	1	1	1
Bhaga_1	752301	752400	0.5	1	1	1	0.5	0.5	1	1	0.5	1
Bhaga_1	752801	752900	0.5	0.5	1	1	0.5	1	1	1	0.5	0.5
Bhaga_1	753001	753100	0.5	0.5	1	1	0.5	0.5	1	1	1	0.5
Bhaga_1	753101	753200	0.5	1	1	1	1	1	1	0.5	1	1
Bhaga_1	756401	756500	1	0.5	1	1	1	1	1	1	1	0.5
Bhaga_1	757101	757200	0.5	0.5	1	0.5	1	1	1	0.5	0.5	0.5
Bhaga_1	757301	757400	1	0.5	1	0.5	0.5	0.5	0.5	1	1	1
Bhaga_1	757401	757500	1	0.5	1	0.5	0.5	1	0.5	1	1	1
Bhaga_1	757801	757900	1	1	0.5	0.5	1	1	1	0.5	1	0.5
Bhaga_1	760201	760300	1	0.5	1	1	1	1	1	0.5	1	1
Bhaga_1	760401	760500	0.5	1	1	0.5	1	1	1	1	1	1
Bhaga_1	760801	760900	1	1	1	1	0.5	0.5	1	1	1	1
Bhaga_1	761401	761500	0.5	1	1	1	1	1	1	0.5	0.5	1
Bhaga_1	761601	761700	0.5	1	1	0.5	1	1	1	0.5	0.5	1
Bhaga_1	763201	763300	0	0	0.5	0.5	0	0	0	0	0.5	0.5
Bhaga_1	767801	767900	0.5	0.5	0	0	0	0	0	0	0	0
Bhaga_1	768201	768300	0.5	0	0	0.5	0	0	0	0.5	0	0
Bhaga_1	768301	768400	0	0	0	0.5	0	0	0	0.5	0.5	0
Bhaga_1	768401	768500	0	0	0	0.5	0.5	0	0	0	0.5	0
Bhaga_1	768501	768600	0	0.5	0.5	0.5	0.5	0.5	0.5	0	0.5	0
Bhaga_1	768801	768900	0.5	0	0	0.5	0	0	0	0	0.5	0.5
Bhaga_1	768901	769000	0.5	0	0	0.5	0	0	0	0	0.5	0.5
Bhaga_1	772001	772100	0	0.5	0	0	0.5	0.5	0	0	0	0.5
Bhaga_1	776401	776500	0.5	0.5	1	0.5	1	0.5	1	0.5	0.5	1
Bhaga_1	776501	776600	1	0.5	1	1	1	0.5	0.5	0.5	1	1
Bhaga_1	778601	778700	0.5	0.5	1	0.5	1	1	0.5	0.5	0.5	1
Bhaga_1	778801	778900	0.5	0.5	0.5	0.5	0	0.5	0.5	0.5	0	0
Bhaga_1	778901	779000	0.5	0	0.5	0	0	0.5	0.5	0.5	0	0
Bhaga_1	779001	779100	0	0	0	0	0	0.5	0.5	0	0	0
Bhaga_1	779101	779200	0.5	0	0	0	0	0.5	0.5	0	0	0
Bhaga_1	782101	782200	0.5	0.5	1	1	0.5	0.5	1	1	0.5	1
Bhaga_1	784101	784200	1	1	1	1	0.5	1	1	1	0.5	1
Bhaga_1	784501	784600	1	1	1	0.5	1	0.5	1	1	0.5	1
Bhaga_1	785101	785200	0.5	1	1	1	0.5	0.5	0.5	1	0.5	0.5
Bhaga_1	785401	785500	0	0.5	0	0.5	0	0	0.5	0	0	0.5
Bhaga_1	785501	785600	0.5	1	0.5	1	0.5	0.5	0.5	0.5	0.5	0.5
Bhaga_1	785601	785700	0.5	1	1	1	1	0.5	1	0.5	1	0.5
Bhaga_1	786501	786600	0.5	1	0.5	0.5	0.5	1	1	0.5	0.5	0.5
Bhaga_1	786601	786700	0.5	1	0.5	0.5	0.5	1	1	0.5	0.5	0.5
Bhaga_1	786701	786800	0.5	1	0.5	0.5	0.5	1	1	0.5	0.5	0.5
Bhaga_1	786801	786900	0.5	1	0.5	0.5	0.5	1	1	0.5	0.5	0.5
Bhaga_1	788401	788500	1	0.5	0.5	1	1	0.5	1	1	1	1
Bhaga_1	788701	788800	1	1	0.5	1	1	0.5	0.5	0.5	1	1
Bhaga_1	790101	790200	0.5	1	0.5	1	1	0.5	1	1	1	1
Bhaga_1	790301	790400	1	1	0.5	1	1	1	0.5	1	0.5	1
Bhaga_1	803701	803800	0.5	0.5	0	0.5	0.5	0	0	0	0	0
Bhaga_1	805001	805100	0	0.5	0	0.5	0	0	0	0	0	0
Bhaga_1	805801	805900	0.5	0.5	0	0	0.5	0	0	0	0	0
Bhaga_1	808201	808300	0	0.5	0.5	0	0.5	0.5	0	0	0	0.5
Bhaga_1	808601	808700	0.5	0.5	1	1	1	1	0.5	1	1	0.5
Bhaga_1	809701	809800	0	0.5	0.5	0	0	0.5	0.5	0	0	0
Bhaga_1	812101	812200	1	1	1	0.5	0.5	1	1	0.5	1	1
Bhaga_1	812201	812300	0.5	0.5	0.5	0.5	0.5	0.5	0.5	0.5	1	1
Bhaga_1	813801	813900	0.5	0	0	0	0	0	0.5	0.5	0	0.5
Bhaga_1	815501	815600	0.5	1	1	1	1	1	1	1	1	1
Bhaga_1	816901	817000	0	0.5	0	0	0	0	0	0	0.5	0
Bhaga_1	818301	818400	0.5	0.5	1	1	1	1	0.5	1	1	0.5
Bhaga_1	818401	818500	0.5	0.5	1	0.5	1	0.5	0.5	0.5	1	0.5
Bhaga_1	818501	818600	0.5	1	1	1	1	0.5	0.5	0.5	1	0.5
Bhaga_1	818601	818700	0.5	1	1	1	1	0.5	0.5	0.5	1	0.5
Bhaga_1	818701	818800	1	1	0.5	0.5	0.5	0.5	0.5	0.5	0.5	0.5
Bhaga_1	834501	834600	1	0.5	1	1	1	0.5	1	0.5	1	1
Bhaga_1	835201	835300	0.5	1	1	1	0.5	1	1	0.5	1	1
Bhaga_1	835501	835600	1	0.5	0.5	1	0.5	1	1	1	1	1
Bhaga_1	836301	836400	0.5	1	1	0.5	0.5	1	1	1	1	1
Bhaga_1	836401	836500	0.5	1	1	1	0.5	0.5	1	0.5	1	1
Bhaga_1	838901	839000	0.5	1	1	1	0.5	0.5	1	1	0.5	0.5
Bhaga_1	853201	853300	1	1	1	1	0.5	1	0.5	1	1	0.5
Bhaga_1	853301	853400	1	0.5	1	1	0.5	1	0.5	1	1	1
Bhaga_1	853401	853500	1	1	1	1	0.5	1	1	0.5	1	1
Bhaga_1	882901	883000	0.5	0.5	1	0.5	0.5	0.5	1	1	1	0.5
Bhaga_1	895101	895200	1	0.5	1	1	0.5	1	1	1	1	1
Bhaga_1	895201	895300	0.5	1	1	1	0.5	1	1	1	1	1
Bhaga_1	898601	898700	0.5	0.5	0	0.5	0	0.5	0	0	0.5	0.5
Bhaga_1	899601	899700	0	0	0.5	0.5	0	0	0	0	0.5	0
Bhaga_1	899701	899800	0	0	0	0.5	0	0	0	0	0.5	0
Bhaga_1	900201	900300	0	0	0	0	0	0	0	0.5	0.5	0
Bhaga_1	900501	900600	0	0.5	0	0	0.5	0	0	0.5	0.5	0
Bhaga_1	901101	901200	0	0	0	0.5	0	0	0.5	0	0	0
Bhaga_1	903501	903600	0	0	0	0.5	0	0	0.5	0.5	0	0
Bhaga_1	903801	903900	0.5	1	1	1	1	1	1	0.5	1	1
Bhaga_1	904001	904100	0.5	0	0	0	0.5	0	0	0	0	0
Bhaga_1	904101	904200	1	0.5	1	1	0.5	0.5	0.5	1	0.5	0.5
Bhaga_1	910301	910400	0	0.5	0.5	0	0	0.5	0	0.5	0.5	0.5
Bhaga_1	910601	910700	0	0	0.5	0.5	0.5	0.5	0.5	0	0	0
Bhaga_1	910701	910800	0	0	0	0	0	0.5	0.5	0	0.5	0
Bhaga_1	911101	911200	0.5	0.5	0.5	0.5	0	0.5	0	0	0.5	0
Bhaga_1	912901	913000	0	0	0	0	0.5	0.5	0.5	0.5	0	0.5
Bhaga_1	914701	914800	0.5	0.5	0.5	0.5	1	0.5	1	0.5	1	0.5
Bhaga_1	918001	918100	0.5	0.5	0	0	0	0.5	0	0.5	0	0.5
Bhaga_1	920801	920900	0.5	0.5	0.5	1	1	0.5	0.5	0.5	1	0.5
Bhaga_1	920901	921000	0.5	0.5	0.5	1	1	0.5	0.5	0.5	1	0.5
Bhaga_1	929001	929100	0.5	0.5	0.5	0.5	1	0.5	1	1	1	0.5
Bhaga_1	931301	931400	0.5	0.5	0.5	0	0.5	0.5	0.5	0	0	0
Bhaga_1	932901	933000	0.5	0.5	0.5	0	0.5	0.5	0.5	0.5	0	0.5
Bhaga_1	938201	938300	0.5	1	0.5	0.5	0.5	0.5	0.5	0.5	0.5	0.5
Bhaga_1	940001	940100	1	1	1	1	1	0.5	1	1	1	0.5
Bhaga_1	940101	940200	1	1	1	0.5	1	0.5	1	1	1	0.5
Bhaga_1	941801	941900	0.5	1	0.5	0.5	1	0.5	0.5	1	1	0.5
Bhaga_1	942301	942400	0.5	0.5	1	1	1	0.5	1	0.5	1	1
Bhaga_1	956701	956800	0.5	1	1	1	0.5	0.5	1	0.5	0.5	0.5
Bhaga_1	956801	956900	0.5	1	1	1	1	0.5	0.5	1	0.5	0.5
Bhaga_1	958701	958800	0.5	1	1	1	1	0.5	1	0.5	0.5	1
Bhaga_1	958801	958900	0.5	1	0.5	1	0.5	0.5	0.5	0.5	0.5	0.5
Bhaga_1	959201	959300	0.5	0.5	0.5	1	1	1	1	1	0.5	0.5
Bhaga_1	959301	959400	0.5	0.5	0.5	1	1	1	1	1	0.5	0.5
Bhaga_1	959501	959600	0	0	0	0.5	0	0	0	0.5	0	0
Bhaga_1	959701	959800	0.5	0	0	0.5	0	0	0	0.5	0	0
Bhaga_1	961101	961200	0.5	0.5	0.5	0.5	0.5	0	0	0.5	0.5	0.5
Bhaga_1	961501	961600	0.5	0.5	0.5	0	0.5	0.5	0	0	0.5	0.5
Bhaga_1	961601	961700	0.5	0.5	0	0	0	0.5	0	0	0.5	0
Bhaga_1	961701	961800	0.5	0.5	0	0	0	0.5	0	0	0.5	0
Bhaga_1	961901	962000	1	0.5	0.5	1	0.5	1	0.5	1	0.5	0.5
Bhaga_1	962101	962200	0.5	0.5	0	0	0	0.5	0	0.5	0.5	0
Bhaga_1	962201	962300	0.5	0.5	0	0	0	0	0	0	0.5	0
Bhaga_1	962301	962400	1	1	1	0.5	0.5	1	1	1	1	0.5
Bhaga_1	965101	965200	1	1	1	0.5	0.5	0.5	1	1	1	1
Bhaga_1	968301	968400	1	1	1	0.5	1	0.5	0.5	1	1	1
Bhaga_1	970001	970100	0.5	0.5	0	0.5	0	0.5	0.5	0.5	0.5	0.5
Bhaga_1	970901	971000	0	0.5	0.5	0.5	0	0	0.5	0	0	0
Bhaga_1	971001	971100	0	0.5	0.5	0.5	0	0	0.5	0	0.5	0
Bhaga_1	973001	973100	1	1	1	1	1	0.5	1	1	0.5	1
Bhaga_1	975501	975600	0.5	0.5	0.5	1	0.5	0.5	0.5	1	0.5	0.5
Bhaga_1	975701	975800	1	1	1	1	0.5	0.5	0.5	1	1	1
Bhaga_1	982201	982300	0.5	0.5	1	0.5	1	0.5	1	1	0.5	0.5
Bhaga_1	985101	985200	0	0	0	0.5	0	0	0.5	0	0.5	0.5
Bhaga_1	997201	997300	1	0.5	0.5	1	1	1	0.5	1	1	1
Bhaga_1	997701	997800	0.5	0.5	0	0	0.5	0.5	0.5	0.5	0	0.5
Bhaga_1	1011901	1012000	0.5	0.5	0.5	1	0.5	1	0.5	0.5	1	0.5
Bhaga_1	1012101	1012200	1	0.5	1	1	0.5	1	0.5	1	0.5	0.5
Bhaga_1	1014701	1014800	0.5	1	0.5	0.5	0.5	1	1	0.5	1	0.5
Bhaga_1	1028201	1028300	1	1	1	1	1	0.5	0.5	1	0.5	1
Bhaga_1	1029401	1029500	1	0.5	1	1	0.5	1	1	0.5	1	1
Bhaga_1	1032101	1032200	1	0.5	1	1	1	1	0.5	1	1	0.5
Bhaga_1	1038901	1039000	0.5	0.5	1	1	0.5	0.5	0.5	0.5	0.5	0.5
Bhaga_1	1041401	1041500	0.5	0.5	1	0.5	0.5	1	1	1	1	1
Bhaga_1	1042101	1042200	1	0.5	1	1	1	0.5	1	1	0.5	1
Bhaga_1	1048601	1048700	0.5	1	0.5	1	1	0.5	1	1	1	0.5
Bhaga_1	1051601	1051700	0.5	0.5	1	1	0.5	0.5	1	1	1	0.5
Bhaga_1	1051701	1051800	0.5	0.5	1	0.5	0.5	0.5	0.5	1	1	0.5
Bhaga_1	1051801	1051900	1	1	1	1	0.5	1	1	0.5	1	0.5
Bhaga_1	1056101	1056200	0	0.5	0.5	0	0	0	0	0.5	0	0
Bhaga_1	1069601	1069700	0	0	0	0.5	0.5	0	0.5	0.5	0.5	0
Bhaga_1	1069701	1069800	0.5	0.5	0	0.5	0.5	0	0.5	0.5	0.5	0
Bhaga_1	1069801	1069900	0	0	0	0.5	0.5	0	0	0	0	0
Bhaga_1	1070201	1070300	0.5	0.5	0	0.5	0.5	0	0	0	0.5	0
Bhaga_1	1070501	1070600	0.5	1	1	1	0.5	1	1	0.5	0.5	0.5
Bhaga_1	1087501	1087600	1	0.5	1	1	1	1	1	1	0.5	0.5
Bhaga_1	1088101	1088200	0	0	0	0	0	0.5	0	0	0	0
Bhaga_1	1089901	1090000	1	1	0.5	1	1	1	0.5	1	0.5	1
Bhaga_1	1090001	1090100	1	1	0.5	1	1	1	0.5	1	0.5	0.5
Bhaga_1	1098901	1099000	0.5	0.5	1	0.5	0.5	1	0.5	1	0.5	0.5
Bhaga_1	1099001	1099100	0.5	1	1	1	1	1	1	1	0.5	1
Bhaga_1	1099901	1100000	0.5	0.5	0	0	0.5	0	0	0.5	0	0
Bhaga_1	1125101	1125200	0.5	0.5	1	0.5	1	0.5	1	1	0.5	0.5
Bhaga_1	1127401	1127500	0.5	1	1	1	1	0.5	0.5	1	1	1
Bhaga_1	1127601	1127700	1	1	0.5	1	1	0.5	1	1	1	0.5
Bhaga_1	1127701	1127800	1	1	0.5	1	0.5	0.5	1	1	1	0.5
Bhaga_1	1129801	1129900	0.5	0	0.5	0.5	0.5	0	0.5	0	0.5	0.5
Bhaga_1	1154301	1154400	0	0	0	0	0.5	0	0.5	0.5	0	0
Bhaga_1	1154401	1154500	0.5	0.5	0.5	0.5	0.5	0	0.5	0.5	0	0.5
Bhaga_1	1158101	1158200	0	0.5	0	0	0.5	0	0	0.5	0	0
Bhaga_1	1158301	1158400	1	0.5	1	0.5	1	0.5	1	0.5	1	0.5
Bhaga_1	1182201	1182300	1	0.5	0.5	1	1	1	0.5	1	1	1
Bhaga_1	1189401	1189500	0.5	0.5	1	1	0.5	0.5	0.5	1	0.5	0.5
Bhaga_1	1189501	1189600	1	0.5	1	1	0.5	1	1	0.5	1	0.5
Bhaga_1	1211001	1211100	0.5	0.5	0.5	0.5	0.5	0	0.5	0.5	0	0.5
Bhaga_1	1214601	1214700	1	0.5	1	1	1	1	1	1	1	1
Bhaga_1	1216001	1216100	0.5	0.5	1	1	0.5	1	0.5	0.5	1	1
Bhaga_1	1225101	1225200	0.5	0.5	0	0.5	0	0	0.5	0.5	0	0.5
Bhaga_1	1227601	1227700	0.5	0	0	0	0	0.5	0	0	0	0
Bhaga_1	1230301	1230400	1	0.5	0.5	1	1	1	0.5	0.5	1	1
Bhaga_1	1232501	1232600	0.5	0.5	0	0.5	0.5	0.5	0	0.5	0	0.5
Bhaga_1	1241901	1242000	0	0.5	0.5	0	0	0.5	0.5	0.5	0.5	0.5
Bhaga_1	1247801	1247900	1	1	1	0.5	1	1	1	1	1	1
Bhaga_1	1267501	1267600	0	0	0	0	0	0.5	0.5	0	0.5	0
Bhaga_1	1269201	1269300	0.5	0.5	0.5	1	0.5	1	1	1	0.5	1
Bhaga_1	1271101	1271200	0.5	0.5	1	1	1	0.5	1	0.5	1	0.5
Bhaga_1	1273301	1273400	0.5	0.5	0.5	0.5	1	0.5	1	1	0.5	0.5
Bhaga_1	1273401	1273500	1	0.5	0.5	0.5	1	0.5	1	1	0.5	0.5
Bhaga_1	1273501	1273600	1	0.5	0.5	0.5	0.5	0.5	1	0.5	0.5	0.5
Bhaga_1	1273601	1273700	1	1	1	1	1	0.5	1	1	0.5	0.5
Bhaga_1	1301001	1301100	1	1	1	0.5	1	0.5	1	1	1	1
Bhaga_1	1301101	1301200	0.5	0.5	0.5	0.5	1	0.5	1	1	0.5	1
Bhaga_1	1305201	1305300	0.5	0.5	0	0.5	0	0.5	0	0.5	0.5	0.5
Bhaga_1	1305301	1305400	0.5	0	0	0.5	0	0.5	0	0.5	0.5	0.5
Bhaga_1	1305401	1305500	0.5	0	0	0.5	0	0.5	0	0.5	0.5	0
Bhaga_1	1305501	1305600	0.5	0	0	0	0	0.5	0	0	0.5	0
Bhaga_1	1305601	1305700	0.5	0	0	0	0	0.5	0	0	0.5	0
Bhaga_1	1305701	1305800	0.5	0.5	0.5	0	0.5	0.5	0.5	0	0.5	0.5
Bhaga_1	1310401	1310500	0.5	0.5	1	1	1	0.5	1	1	1	1
Bhaga_1	1312101	1312200	0.5	1	1	1	1	1	1	1	0.5	1
Bhaga_1	1320001	1320100	0.5	0	0	0	0.5	0	0.5	0	0	0.5
Bhaga_1	1320201	1320300	0.5	0.5	0.5	0	0	0	0.5	0.5	0	0.5
Bhaga_1	1338501	1338600	1	1	1	1	0.5	1	1	1	1	1
Bhaga_1	1338601	1338700	0.5	0.5	0.5	1	0.5	1	0.5	0.5	0.5	0.5
Bhaga_1	1341801	1341900	1	0.5	0.5	1	0.5	1	1	1	0.5	1
Bhaga_1	1342801	1342900	0.5	0.5	1	0.5	1	1	1	0.5	0.5	0.5
Bhaga_1	1343701	1343800	0.5	0.5	1	0.5	0.5	0.5	1	1	1	0.5
Bhaga_1	1343801	1343900	0.5	1	1	0.5	0.5	0.5	0.5	1	0.5	0.5
Bhaga_1	1344201	1344300	1	0.5	1	0.5	1	1	1	1	0.5	0.5
Bhaga_1	1344301	1344400	0.5	1	1	0.5	0.5	1	1	1	0.5	0.5
Bhaga_1	1344601	1344700	0.5	1	0.5	1	0.5	0.5	1	1	1	0.5
Bhaga_1	1357901	1358000	0.5	0.5	0.5	0.5	0	0	0.5	0	0.5	0
Bhaga_1	1371401	1371500	0.5	0.5	0.5	1	1	1	1	1	1	0.5
Bhaga_1	1374201	1374300	0	0	0	0	0.5	0	0	0	0	0
Bhaga_1	1387201	1387300	0.5	1	1	1	0.5	0.5	1	0.5	0.5	0.5
Bhaga_1	1397601	1397700	0.5	0.5	1	0.5	0.5	1	0.5	0.5	0.5	0.5
Bhaga_1	1397701	1397800	0.5	0.5	1	0.5	1	0.5	1	0.5	0.5	0.5
Bhaga_1	1433501	1433600	1	0.5	1	0.5	0.5	1	0.5	1	1	0.5
Bhaga_1	1434301	1434400	1	1	0.5	1	1	0.5	1	1	0.5	1
Bhaga_1	1434401	1434500	1	1	0.5	1	1	0.5	1	1	1	1
Bhaga_1	1435501	1435600	1	0.5	1	1	1	1	1	0.5	0.5	1
Bhaga_1	1436601	1436700	1	1	1	1	1	0.5	0.5	1	1	1
Bhaga_1	1436701	1436800	1	1	1	1	1	0.5	0.5	1	1	1
Bhaga_1	1437201	1437300	1	0.5	0.5	0.5	0.5	0.5	1	0.5	0.5	0.5
Bhaga_1	1437301	1437400	1	0.5	0.5	0.5	0.5	0.5	1	0.5	0.5	0.5
Bhaga_1	1437401	1437500	0.5	0.5	0.5	1	0.5	0.5	1	0.5	1	0.5
Bhaga_1	1443501	1443600	1	1	1	0.5	0.5	1	0.5	1	1	1
Bhaga_1	1449501	1449600	1	1	1	1	0.5	0.5	1	1	0.5	0.5
Bhaga_1	1455901	1456000	0.5	0.5	0.5	1	0.5	0.5	1	0.5	1	0.5
Bhaga_1	1458101	1458200	0	0	0	0.5	0.5	0	0	0	0.5	0
Bhaga_1	1458201	1458300	0	0	0	0	0	0	0	0	0.5	0
Bhaga_1	1458301	1458400	0	0	0	0.5	0	0	0	0	0	0
Bhaga_1	1479501	1479600	0.5	0	0.5	0	0	0	0.5	0.5	0.5	0
Bhaga_1	1488501	1488600	0.5	0.5	1	0.5	0.5	0.5	1	0.5	0.5	0.5
Bhaga_1	1489401	1489500	0.5	0.5	0.5	0	0	0	0.5	0	0.5	0.5
Bhaga_1	1489501	1489600	0.5	0.5	0.5	0	0	0	0.5	0	0.5	0.5
Bhaga_1	1509501	1509600	0.5	0.5	0.5	1	1	1	1	0.5	1	1
Bhaga_1	1511901	1512000	1	1	0.5	0.5	1	1	0.5	0.5	0.5	1
Bhaga_1	1512101	1512200	0.5	1	1	1	0.5	1	0.5	1	0.5	1
Bhaga_1	1512201	1512300	0.5	0.5	0.5	1	1	0.5	0.5	0.5	0.5	0.5
Bhaga_1	1512301	1512400	0.5	1	0.5	0.5	1	0.5	0.5	0.5	0.5	0.5
Bhaga_1	1514201	1514300	0	0	0.5	0	0	0	0	0	0	0
Bhaga_1	1520601	1520700	0.5	0.5	0	0	0.5	0	0	0	0	0
Bhaga_1	1521201	1521300	0.5	0.5	0.5	0	0.5	0.5	0.5	0.5	0.5	0
Bhaga_1	1524901	1525000	1	1	1	0.5	0.5	1	1	1	1	1
Bhaga_1	1525701	1525800	1	0.5	1	0.5	0.5	1	0.5	1	1	1
Bhaga_1	1525801	1525900	1	0.5	1	0.5	0.5	1	0.5	1	1	1
Bhaga_1	1527601	1527700	1	1	1	1	0.5	1	0.5	0.5	1	1
Bhaga_1	1528401	1528500	1	0.5	0.5	0.5	1	1	0.5	0.5	1	1
Bhaga_1	1528601	1528700	1	0.5	0.5	1	1	1	0.5	0.5	0.5	1
Bhaga_1	1529201	1529300	0.5	0.5	0.5	0.5	1	1	0.5	1	0.5	1
Bhaga_1	1529301	1529400	0.5	0.5	0.5	0.5	1	1	0.5	1	0.5	1
Bhaga_1	1530001	1530100	0.5	0.5	1	0.5	1	1	0.5	0.5	0.5	0.5
Bhaga_1	1530201	1530300	0	0.5	0.5	0	0	0.5	0.5	0.5	0	0.5
Bhaga_1	1535901	1536000	0	0	0.5	0	0	0	0.5	0	0	0
Bhaga_1	1537201	1537300	0	0	0	0.5	0	0.5	0	0.5	0.5	0
Bhaga_1	1537301	1537400	0	0	0	0.5	0	0.5	0	0.5	0.5	0
Bhaga_1	1540601	1540700	0	0.5	0	0	0.5	0.5	0.5	0.5	0.5	0.5
Bhaga_1	1540701	1540800	0	0	0.5	0	0.5	0	0.5	0	0	0.5
Bhaga_1	1545301	1545400	0	0	0.5	0.5	0	0	0	0.5	0	0
Bhaga_1	1550001	1550100	0	0	0.5	0	0	0	0	0	0	0
Bhaga_1	1553701	1553800	1	1	0.5	1	0.5	1	0.5	0.5	1	1
Bhaga_1	1557901	1558000	1	0.5	1	1	1	1	0.5	1	1	1
Bhaga_1	1558401	1558500	1	1	1	1	0.5	0.5	1	1	1	1
Bhaga_1	1563401	1563500	0.5	1	1	0.5	1	1	1	1	0.5	1
Bhaga_1	1568901	1569000	1	1	1	0.5	0.5	1	1	1	1	1
Bhaga_1	1580101	1580200	0.5	1	0.5	1	1	1	1	1	0.5	1
Bhaga_1	1586601	1586700	0.5	1	1	1	0.5	0.5	1	1	0.5	0.5
Bhaga_1	1598601	1598700	1	0.5	1	0.5	1	0.5	0.5	1	0.5	1
Bhaga_1	1601901	1602000	0.5	1	1	1	1	1	0.5	1	1	0.5
Bhaga_1	1605901	1606000	0.5	0.5	0	0.5	0.5	0	0.5	0	0.5	0.5
Bhaga_1	1606101	1606200	1	0.5	1	1	0.5	1	1	0.5	0.5	0.5
Bhaga_1	1606201	1606300	0.5	0.5	0.5	0.5	1	0.5	1	0.5	0.5	0.5
Bhaga_1	1606901	1607000	0	0.5	0	0.5	0.5	0.5	0	0	0	0
Bhaga_1	1607401	1607500	0.5	0.5	1	0.5	0.5	1	0.5	0.5	0.5	0.5
Bhaga_1	1611001	1611100	0.5	0.5	0.5	0.5	0	0.5	0	0.5	0	0.5
Bhaga_1	1614701	1614800	0.5	0.5	1	1	0.5	1	1	0.5	0.5	0.5
Bhaga_1	1620801	1620900	1	1	0.5	1	1	1	0.5	1	1	1
Bhaga_1	1622101	1622200	0.5	1	1	1	1	0.5	1	1	1	1
Bhaga_1	1627001	1627100	0.5	1	1	1	1	0.5	0.5	1	0.5	0.5
Bhaga_1	1628501	1628600	1	1	1	0.5	1	0.5	1	1	1	0.5
Bhaga_1	1634601	1634700	0.5	1	1	1	0.5	1	1	1	1	0.5
Bhaga_1	1634901	1635000	0.5	1	1	1	0.5	1	1	1	1	0.5
Bhaga_1	1635001	1635100	0.5	0.5	0.5	0.5	0.5	1	0.5	1	1	0.5
Bhaga_1	1642001	1642100	0.5	1	1	1	1	1	1	1	1	1
Bhaga_1	1646101	1646200	0.5	0.5	0.5	1	1	0.5	0.5	1	1	0.5
Bhaga_1	1671301	1671400	1	0.5	0.5	1	0.5	0.5	0.5	1	0.5	0.5
Bhaga_1	1671401	1671500	1	0.5	1	1	0.5	0.5	0.5	1	0.5	0.5
Bhaga_1	1706001	1706100	1	1	1	1	1	1	1	0.5	0.5	1
Bhaga_1	1707201	1707300	0.5	0.5	0.5	0.5	0.5	0	0.5	0.5	0	0.5
Bhaga_1	1707301	1707400	0.5	0.5	0.5	0.5	0.5	0	0.5	0.5	0	0.5
Bhaga_1	1707901	1708000	1	0.5	1	0.5	1	1	0.5	0.5	0.5	0.5
Bhaga_1	1708101	1708200	1	1	0.5	1	1	0.5	1	1	1	1
Bhaga_1	1708501	1708600	1	1	1	1	0.5	1	0.5	1	1	0.5
Bhaga_1	1709801	1709900	0	0	0.5	0.5	0	0	0.5	0	0.5	0
Bhaga_1	1711201	1711300	0	0	0.5	0	0	0	0	0	0	0.5
Bhaga_1	1711301	1711400	1	1	1	1	1	1	1	0.5	0.5	0.5
Bhaga_1	1711401	1711500	1	1	1	1	1	1	1	0.5	0.5	0.5
Bhaga_1	1718101	1718200	1	0.5	1	1	0.5	0.5	1	1	1	1
Bhaga_1	1718901	1719000	0	0	0.5	0	0.5	0	0	0	0.5	0
Bhaga_1	1720701	1720800	0.5	0.5	1	1	0.5	0.5	1	0.5	0.5	0.5
Bhaga_1	1728501	1728600	0.5	0.5	0.5	0.5	0	0	0.5	0	0.5	0.5
Bhaga_1	1731801	1731900	0	0.5	0	0.5	0	0	0.5	0.5	0.5	0.5
Bhaga_1	1731901	1732000	0	0	0	0.5	0	0	0.5	0	0.5	0
Bhaga_1	1732201	1732300	0.5	0	0	0	0.5	0	0.5	0	0	0
Bhaga_1	1733601	1733700	0.5	0.5	0.5	0.5	0.5	0.5	0.5	0.5	0.5	0
Bhaga_1	1738001	1738100	1	1	1	1	1	1	1	0.5	1	1
Bhaga_1	1740001	1740100	0.5	0.5	0.5	0.5	0.5	0	0.5	0	0.5	0
Bhaga_1	1740101	1740200	1	1	1	1	1	0.5	0.5	1	1	0.5
Bhaga_1	1741301	1741400	0	0	0	0	0	0.5	0	0	0	0.5
Bhaga_1	1741701	1741800	0.5	0.5	0.5	0	0.5	0	0.5	0	0.5	0.5
Bhaga_1	1747601	1747700	1	1	1	1	1	0.5	1	1	0.5	1
Bhaga_1	1747701	1747800	1	0.5	0.5	0.5	1	0.5	0.5	1	0.5	1
Bhaga_1	1747901	1748000	1	1	0.5	1	1	1	1	1	0.5	0.5
Bhaga_1	1756801	1756900	1	0.5	1	1	1	1	1	0.5	0.5	1
Bhaga_1	1758901	1759000	0.5	0.5	0	0.5	0	0.5	0.5	0	0	0
Bhaga_1	1768901	1769000	0.5	1	0.5	0.5	0.5	0.5	0.5	1	0.5	1
Bhaga_1	1769001	1769100	0.5	1	0.5	0.5	0.5	1	1	1	1	1
Bhaga_1	1769101	1769200	0.5	1	0.5	0.5	0.5	0.5	0.5	1	1	1
Bhaga_1	1769401	1769500	0.5	0.5	0.5	0	0	0	0.5	0	0	0
Bhaga_1	1781201	1781300	0.5	1	0.5	1	1	1	1	1	1	1
Bhaga_1	1781501	1781600	1	0.5	1	1	1	0.5	0.5	1	1	1
Bhaga_1	1783501	1783600	0.5	0.5	0.5	0.5	0.5	1	0.5	0.5	0.5	1
Bhaga_1	1789401	1789500	1	0.5	1	1	1	1	1	1	0.5	0.5
Bhaga_1	1790401	1790500	0.5	0	0	0	0	0	0	0.5	0.5	0
Bhaga_1	1791201	1791300	0	0	0.5	0	0	0.5	0.5	0	0.5	0.5
Bhaga_1	1791301	1791400	0	0	0	0	0	0	0	0.5	0.5	0.5
Bhaga_1	1795301	1795400	1	0.5	1	1	0.5	1	1	0.5	1	0.5
Bhaga_1	1795601	1795700	1	0.5	0.5	1	1	1	0.5	0.5	1	0.5
Bhaga_1	1796301	1796400	0.5	0.5	1	1	1	1	1	0.5	0.5	0.5
Bhaga_1	1798201	1798300	0	0.5	0.5	0	0	0	0.5	0	0	0
Bhaga_1	1798301	1798400	0.5	0.5	0.5	0	0	0.5	0.5	0	0.5	0
Bhaga_1	1802301	1802400	1	1	1	1	0.5	1	1	0.5	1	0.5
Bhaga_1	1813201	1813300	1	0.5	0.5	1	1	0.5	0.5	1	1	0.5
Bhaga_1	1816001	1816100	0.5	0.5	1	1	0.5	0.5	1	1	0.5	0.5
Bhaga_1	1816601	1816700	0	0	0	0.5	0.5	0.5	0.5	0.5	0	0
Bhaga_1	1822401	1822500	0.5	1	1	1	1	1	1	1	0.5	0.5
Bhaga_1	1822501	1822600	0.5	0.5	1	1	0.5	1	1	0.5	0.5	0.5
Bhaga_1	1822601	1822700	0.5	0.5	1	1	0.5	1	1	0.5	0.5	0.5
Bhaga_1	1822801	1822900	1	1	1	1	1	0.5	1	1	1	0.5
Bhaga_1	1823201	1823300	0.5	1	0.5	1	0.5	0.5	1	0.5	1	0.5
Bhaga_1	1827001	1827100	1	1	1	1	0.5	1	0.5	0.5	1	1
Bhaga_1	1827101	1827200	1	1	1	1	0.5	0.5	0.5	0.5	1	1
Bhaga_1	1828301	1828400	1	0.5	1	1	1	0.5	1	1	1	1
Bhaga_1	1829701	1829800	1	0.5	0.5	1	1	1	0.5	1	1	1
Bhaga_1	1830601	1830700	0.5	0.5	0.5	0.5	0.5	0	0	0	0.5	0.5
Bhaga_1	1835401	1835500	0.5	0.5	0.5	0.5	1	1	1	1	1	1
Bhaga_1	1845601	1845700	0	0	0.5	0	0.5	0.5	0.5	0.5	0.5	0
Bhaga_1	1856301	1856400	0.5	0.5	0.5	0.5	0.5	1	1	0.5	1	0.5
Bhaga_1	1876301	1876400	0.5	1	1	1	1	0.5	1	1	1	1
Bhaga_1	1876401	1876500	0.5	0.5	1	1	1	1	1	1	1	1
Bhaga_1	1879401	1879500	0.5	0.5	0.5	0.5	1	0.5	0.5	1	0.5	0.5
Bhaga_1	1883201	1883300	1	0.5	1	0.5	1	1	1	0.5	1	1
Bhaga_1	1883301	1883400	1	1	1	0.5	1	0.5	1	0.5	1	1
Bhaga_1	1885501	1885600	0.5	0.5	0.5	1	1	0.5	0.5	0.5	1	1
Bhaga_1	1885601	1885700	0.5	0.5	0.5	0.5	1	0.5	1	0.5	1	1
Bhaga_1	1885701	1885800	0.5	0.5	0.5	0.5	1	0.5	0.5	0.5	1	1
Bhaga_1	1888601	1888700	0.5	1	0.5	0.5	0.5	0.5	1	1	1	1
Bhaga_1	1888701	1888800	0.5	0.5	0.5	0.5	0.5	0.5	1	1	1	1
Bhaga_1	1905201	1905300	1	0.5	1	1	1	1	1	1	1	1
Bhaga_1	1919801	1919900	0.5	1	1	0.5	1	1	0.5	1	1	0.5
Bhaga_1	1921701	1921800	0.5	0.5	0.5	0.5	0.5	1	1	1	0.5	1
Bhaga_1	1922101	1922200	1	1	1	1	1	1	0.5	0.5	1	1
Bhaga_1	1922201	1922300	1	1	0.5	1	1	1	0.5	1	1	1
Bhaga_1	1922301	1922400	1	1	0.5	0.5	1	0.5	0.5	0.5	1	1
Bhaga_1	1922401	1922500	1	0.5	1	1	1	0.5	1	1	0.5	1
Bhaga_1	1922501	1922600	0.5	1	0.5	1	0.5	0.5	0.5	0.5	0.5	0.5
Bhaga_1	1922801	1922900	0.5	0.5	0.5	0.5	0.5	1	0.5	0.5	0.5	0.5
Bhaga_1	1926401	1926500	1	1	1	0.5	1	1	1	0.5	1	0.5
Bhaga_1	1929101	1929200	1	1	1	0.5	1	1	0.5	0.5	1	1
Bhaga_1	1929701	1929800	0.5	1	1	1	1	0.5	0.5	1	1	1
Bhaga_1	1938201	1938300	1	0.5	0.5	0.5	1	1	1	1	1	1
Bhaga_1	1958601	1958700	0.5	0.5	0.5	0.5	0.5	0.5	1	0.5	1	1
Bhaga_1	1958701	1958800	0.5	0.5	0.5	1	0.5	0.5	1	0.5	1	1
Bhaga_1	1959101	1959200	0.5	1	0.5	1	1	1	1	0.5	0.5	1
Bhaga_1	1966001	1966100	1	1	1	1	0.5	1	1	0.5	1	1
Bhaga_1	1969401	1969500	0.5	0.5	1	0.5	0.5	0.5	0.5	0.5	1	1
Bhaga_1	1969601	1969700	1	1	1	1	0.5	1	1	1	1	0.5
Bhaga_1	1970101	1970200	0.5	1	1	1	0.5	0.5	1	0.5	1	1
Bhaga_1	1970701	1970800	0.5	0.5	1	0.5	0.5	0.5	1	1	0.5	0.5
Bhaga_1	1984601	1984700	0.5	0.5	1	0.5	1	0.5	1	1	1	1
Bhaga_1	1985501	1985600	1	1	0.5	1	1	1	1	0.5	1	0.5
Bhaga_1	1994001	1994100	1	0.5	1	1	1	1	0.5	0.5	1	1
Bhaga_1	1994101	1994200	1	0.5	1	1	1	1	0.5	0.5	1	1
Bhaga_1	1994201	1994300	1	1	0.5	1	1	0.5	0.5	1	1	1
Bhaga_1	1998801	1998900	0.5	1	1	1	1	1	1	0.5	1	1
Bhaga_1	2001301	2001400	0	0.5	0.5	0.5	0	0	0	0	0.5	0
Bhaga_1	2008501	2008600	1	0.5	1	1	1	1	0.5	0.5	0.5	1
Bhaga_1	2013401	2013500	1	1	1	1	0.5	1	1	0.5	0.5	1
Bhaga_1	2019101	2019200	0	0.5	0	0	0	0.5	0.5	0	0	0.5
Bhaga_1	2031701	2031800	0.5	1	1	1	1	1	0.5	1	1	0.5
Bhaga_1	2033801	2033900	1	1	0.5	0.5	0.5	1	0.5	0.5	1	0.5
Bhaga_1	2034001	2034100	1	0.5	1	1	1	1	0.5	1	1	1
Bhaga_1	2035301	2035400	0.5	0.5	0.5	0.5	0.5	1	0.5	0.5	1	0.5
Bhaga_1	2038901	2039000	1	1	0.5	1	0.5	0.5	0.5	0.5	1	0.5
Bhaga_1	2057401	2057500	0.5	0.5	0.5	0.5	0.5	1	1	1	0.5	0.5
Bhaga_1	2059701	2059800	1	1	1	1	1	1	0.5	1	0.5	1
Bhaga_1	2059801	2059900	0.5	1	1	1	0.5	1	0.5	0.5	0.5	0.5
Bhaga_1	2064001	2064100	1	1	1	0.5	1	1	1	1	1	1
Bhaga_1	2064101	2064200	1	1	1	0.5	1	1	1	1	1	1
Bhaga_1	2064201	2064300	1	1	1	0.5	0.5	1	1	1	0.5	1
Bhaga_1	2065701	2065800	1	1	1	1	1	1	1	1	0.5	1
Bhaga_1	2067001	2067100	1	1	0.5	0.5	0.5	1	0.5	0.5	0.5	0.5
Bhaga_1	2067201	2067300	0.5	1	0.5	1	1	0.5	1	1	0.5	0.5
Bhaga_1	2080801	2080900	1	1	1	1	1	0.5	0.5	1	0.5	1
Bhaga_1	2089901	2090000	0.5	0.5	1	1	1	1	1	1	0.5	1
Bhaga_1	2109701	2109800	1	0.5	1	0.5	1	1	0.5	1	1	1
Bhaga_1	2110201	2110300	0.5	0.5	0.5	0.5	1	1	1	0.5	0.5	0.5
Bhaga_1	2113701	2113800	0	0.5	0.5	0.5	0.5	0.5	0.5	0	0.5	0.5
Bhaga_1	2115601	2115700	0.5	0.5	1	1	0.5	0.5	0.5	1	0.5	0.5
Bhaga_1	2115701	2115800	0.5	0.5	1	1	0.5	1	0.5	1	0.5	0.5
Bhaga_1	2122601	2122700	0.5	0.5	0.5	0.5	0.5	0.5	1	0.5	0.5	0.5
Bhaga_1	2123601	2123700	0.5	0.5	1	1	1	0.5	1	1	0.5	1
Bhaga_1	2123801	2123900	1	1	0.5	0.5	1	0.5	0.5	0.5	1	0.5
Bhaga_1	2124001	2124100	1	1	0.5	1	0.5	0.5	1	1	1	1
Bhaga_1	2124601	2124700	0.5	0.5	0.5	1	1	0.5	1	1	0.5	1
Bhaga_1	2125201	2125300	0.5	1	0.5	1	0.5	0.5	0.5	0.5	0.5	0.5
Bhaga_1	2126301	2126400	1	0.5	0.5	0.5	1	1	0.5	0.5	1	0.5
Bhaga_1	2126401	2126500	1	0.5	0.5	0.5	1	1	0.5	1	1	0.5
Bhaga_1	2146301	2146400	0	0	0.5	0	0.5	0.5	0.5	0	0.5	0.5
Bhaga_1	2146401	2146500	0.5	0.5	0.5	0.5	0.5	0.5	1	1	1	1
Bhaga_1	2147601	2147700	1	0.5	0.5	1	1	1	1	1	1	0.5
Bhaga_1	2147801	2147900	0.5	0.5	0.5	0.5	0.5	0.5	1	0.5	1	0.5
Bhaga_1	2149501	2149600	1	1	0.5	0.5	1	1	1	1	1	1
Bhaga_1	2150001	2150100	0.5	1	1	1	0.5	1	0.5	0.5	0.5	0.5
Bhaga_1	2154201	2154300	0	0	0.5	0.5	0	0.5	0	0	0.5	0
Bhaga_1	2154301	2154400	0	0	0	0.5	0	0.5	0	0	0.5	0
Bhaga_1	2161201	2161300	0.5	1	0.5	0.5	0.5	0.5	0.5	1	1	1
Bhaga_1	2161301	2161400	1	1	0.5	0.5	1	0.5	0.5	1	1	0.5
Bhaga_1	2164801	2164900	0.5	1	1	1	1	1	0.5	0.5	1	1
Bhaga_1	2168601	2168700	0.5	0.5	0.5	1	0.5	1	1	1	1	1
Bhaga_1	2174601	2174700	1	1	1	0.5	0.5	0.5	1	0.5	1	0.5
Bhaga_1	2188801	2188900	0.5	1	1	0.5	0.5	0.5	0.5	1	1	0.5
Bhaga_1	2189001	2189100	1	1	1	1	0.5	0.5	1	1	1	0.5
Bhaga_1	2189601	2189700	0.5	0.5	0.5	0.5	0.5	0	0.5	0.5	0	0.5
Bhaga_1	2235001	2235100	1	0.5	1	1	1	0.5	1	1	0.5	1
Bhaga_1	2251301	2251400	0.5	0.5	1	0.5	0.5	1	0.5	1	0.5	1
Bhaga_1	2253601	2253700	0.5	1	0.5	1	0.5	1	1	1	1	0.5
Bhaga_1	2253801	2253900	1	0.5	1	1	1	1	0.5	1	1	1
Bhaga_1	2253901	2254000	1	1	0.5	1	1	0.5	1	1	1	1
Bhaga_1	2257201	2257300	0.5	1	1	0.5	1	0.5	1	1	1	1
Bhaga_1	2279601	2279700	0.5	1	1	0.5	1	1	1	1	1	1
Bhaga_1	2279701	2279800	1	1	1	1	1	0.5	0.5	1	1	1
Bhaga_1	2279801	2279900	0.5	1	1	0.5	1	1	0.5	1	1	1
Bhaga_1	2279901	2280000	0.5	1	1	1	1	1	0.5	1	1	1
Bhaga_1	2287901	2288000	0.5	1	1	0.5	1	1	0.5	1	0.5	1
Bhaga_1	2288001	2288100	0.5	1	1	1	1	1	1	1	1	1
Bhaga_1	2290401	2290500	1	0.5	1	1	1	1	0.5	1	1	0.5
Bhaga_1	2294301	2294400	0.5	1	1	0.5	1	1	1	1	0.5	0.5
Bhaga_1	2296401	2296500	1	1	0.5	1	1	1	0.5	0.5	1	1
Bhaga_1	2304401	2304500	1	1	1	1	0.5	0.5	1	1	1	1
Bhaga_1	2308701	2308800	1	0.5	1	0.5	0.5	0.5	1	1	1	0.5
Bhaga_1	2308801	2308900	0.5	0.5	0.5	0.5	0.5	0.5	1	1	1	0.5
Bhaga_1	2327701	2327800	0	0.5	0.5	0.5	0.5	0.5	0.5	0.5	0	0
Bhaga_1	2327801	2327900	1	1	0.5	0.5	1	1	1	1	1	0.5
Bhaga_1	2330701	2330800	1	0.5	1	0.5	1	1	1	0.5	0.5	1
Bhaga_1	2339501	2339600	0.5	0.5	0.5	0.5	1	0.5	0.5	0.5	1	0.5
Bhaga_1	2343501	2343600	0.5	0.5	0.5	0.5	0.5	1	0.5	1	0.5	1
Bhaga_1	2343601	2343700	0.5	1	1	0.5	1	1	1	0.5	1	0.5
Bhaga_1	2345401	2345500	0.5	0	0	0	0	0.5	0	0	0	0
Bhaga_1	2346101	2346200	0.5	0	0.5	0	0.5	0	0	0	0	0
Bhaga_1	2350801	2350900	0.5	0.5	0.5	1	0.5	1	0.5	0.5	0.5	0.5
Bhaga_1	2353301	2353400	1	0.5	0.5	1	0.5	0.5	1	1	1	1
Bhaga_1	2353501	2353600	0.5	0.5	0.5	0.5	0.5	0.5	1	1	0.5	0.5
Bhaga_1	2355301	2355400	0.5	0.5	0.5	0	0.5	0	0.5	0	0.5	0
Bhaga_1	2355401	2355500	0.5	0.5	0.5	0	0.5	0	0.5	0	0.5	0.5
Bhaga_1	2355501	2355600	0.5	0.5	0.5	1	0.5	1	0.5	0.5	1	1
Bhaga_1	2356501	2356600	0	0	0	0	0	0.5	0	0.5	0	0
Bhaga_1	2357101	2357200	0.5	0.5	0	0.5	0	0.5	0	0	0	0.5
Bhaga_1	2358501	2358600	0.5	0	0.5	0.5	0.5	0	0.5	0.5	0.5	0
Bhaga_1	2374701	2374800	1	1	1	1	1	1	0.5	1	1	1
Bhaga_1	2374801	2374900	0.5	0.5	1	1	1	1	1	1	0.5	0.5
Bhaga_1	2381901	2382000	0.5	0.5	0.5	0.5	0	0.5	0.5	0	0.5	0.5
Bhaga_1	2385801	2385900	0.5	0.5	0.5	0.5	0	0	0	0.5	0	0.5
Bhaga_1	2385901	2386000	0.5	0	0	0.5	0	0	0	0	0	0
Bhaga_1	2386001	2386100	0	0	0.5	0.5	0	0	0	0.5	0.5	0.5
Bhaga_1	2386101	2386200	0	0	0.5	0	0	0	0	0	0.5	0.5
Bhaga_1	2388401	2388500	0	0	0	0.5	0	0.5	0.5	0	0	0
Bhaga_1	2389201	2389300	0	0	0.5	0.5	0	0	0	0	0.5	0.5
Bhaga_1	2392601	2392700	0.5	0.5	0.5	0	0	0	0	0	0.5	0
Bhaga_1	2400601	2400700	0.5	1	1	1	0.5	1	1	1	0.5	1
Bhaga_1	2435701	2435800	1	1	1	1	0.5	1	1	1	0.5	0.5
Bhaga_1	2436101	2436200	0.5	0.5	1	0.5	0.5	1	1	0.5	1	1
Bhaga_1	2436701	2436800	1	0.5	0.5	0.5	0.5	0.5	0.5	1	0.5	0.5
Bhaga_1	2436801	2436900	1	0.5	1	1	1	1	1	1	0.5	0.5
Bhaga_1	2436901	2437000	1	0.5	1	1	1	1	1	1	0.5	0.5
Bhaga_1	2437001	2437100	0.5	0.5	1	1	1	1	1	1	0.5	0.5
Bhaga_1	2438601	2438700	0	0.5	0	0	0	0	0	0	0	0
Bhaga_1	2443501	2443600	1	1	1	1	0.5	1	0.5	0.5	0.5	1
Bhaga_1	2444201	2444300	0.5	0.5	0.5	0.5	0.5	0.5	1	1	1	0.5
Bhaga_1	2444301	2444400	0.5	1	1	0.5	0.5	0.5	1	1	1	0.5
Bhaga_1	2455301	2455400	0.5	1	0.5	0.5	1	0.5	1	0.5	1	0.5
Bhaga_1	2460701	2460800	0	0	0	0	0.5	0	0	0	0.5	0.5
Bhaga_1	2460901	2461000	1	0.5	1	1	1	0.5	0.5	0.5	0.5	1
Bhaga_1	2464101	2464200	0.5	0.5	1	1	1	0.5	1	1	0.5	0.5
Bhaga_1	2473901	2474000	1	0.5	0.5	0.5	1	1	0.5	1	0.5	0.5
Bhaga_1	2474001	2474100	1	0.5	0.5	1	1	1	1	0.5	0.5	0.5
Bhaga_1	2474101	2474200	1	0.5	0.5	0.5	0.5	0.5	0.5	0.5	0.5	0.5
Bhaga_1	2474501	2474600	0	0	0.5	0.5	0.5	0	0.5	0.5	0.5	0.5
Bhaga_1	2475501	2475600	1	1	1	1	0.5	1	1	1	0.5	1
Bhaga_1	2475601	2475700	1	1	0.5	1	0.5	1	1	1	0.5	1
Bhaga_1	2475701	2475800	1	1	1	1	0.5	1	1	1	0.5	1
Bhaga_1	2475801	2475900	1	1	0.5	1	0.5	1	1	1	0.5	1
Bhaga_1	2476001	2476100	1	0.5	0.5	1	0.5	0.5	0.5	1	0.5	1
Bhaga_1	2476201	2476300	0.5	0	0.5	0	0.5	0.5	0.5	0.5	0.5	0.5
Bhaga_1	2476301	2476400	0.5	0.5	0.5	0.5	0	0.5	0.5	0.5	0.5	0.5
Bhaga_1	2477601	2477700	1	1	1	1	0.5	0.5	1	0.5	0.5	1
Bhaga_1	2479401	2479500	0.5	1	0.5	1	1	1	0.5	0.5	0.5	0.5
Bhaga_1	2486601	2486700	0.5	0.5	1	1	0.5	1	1	0.5	1	0.5
Bhaga_1	2486701	2486800	1	0.5	1	1	0.5	1	1	1	1	0.5
Bhaga_1	2489301	2489400	0.5	0	0	0	0.5	0	0.5	0	0	0.5
Bhaga_1	2492801	2492900	1	1	1	1	1	1	1	0.5	1	0.5
Bhaga_1	2493201	2493300	0.5	1	1	1	0.5	0.5	1	0.5	1	0.5
Bhaga_1	2493301	2493400	0.5	1	0.5	1	0.5	0.5	1	0.5	1	0.5
Bhaga_1	2493401	2493500	0.5	1	1	0.5	1	0.5	1	0.5	1	1
Bhaga_1	2493501	2493600	0.5	1	1	0.5	0.5	1	0.5	0.5	0.5	1
Bhaga_1	2493601	2493700	1	1	0.5	1	1	1	0.5	0.5	0.5	1
Bhaga_1	2493701	2493800	1	1	0.5	1	1	1	0.5	0.5	1	1
Bhaga_1	2500801	2500900	0.5	1	1	0.5	1	1	1	1	0.5	0.5
Bhaga_1	2502801	2502900	0.5	0.5	1	0.5	1	0.5	0.5	0.5	0.5	0.5
Bhaga_1	2508201	2508300	0.5	0.5	0.5	0.5	0.5	0	0	0.5	0.5	0
Bhaga_1	2509001	2509100	0.5	0.5	0.5	0.5	0.5	1	1	0.5	0.5	0.5
Bhaga_1	2524001	2524100	0.5	0	0	0	0.5	0	0	0	0	0.5
Bhaga_1	2527701	2527800	1	1	1	1	1	1	1	0.5	0.5	1
Bhaga_1	2527801	2527900	1	0.5	0.5	1	1	1	1	1	0.5	1
Bhaga_1	2528101	2528200	1	1	1	1	1	0.5	0.5	0.5	1	1
Bhaga_1	2529901	2530000	1	0.5	1	1	1	1	1	0.5	1	1
Bhaga_1	2530001	2530100	0.5	0.5	1	0.5	1	1	0.5	0.5	0.5	0.5
Bhaga_1	2530101	2530200	0.5	0.5	0.5	1	1	1	1	0.5	1	1
Bhaga_1	2530401	2530500	1	0.5	0.5	1	1	1	0.5	0.5	1	1
Bhaga_1	2530701	2530800	0.5	0.5	0.5	0.5	0.5	0.5	1	0.5	1	0.5
Bhaga_1	2531101	2531200	0.5	1	1	1	1	1	0.5	1	0.5	1
Bhaga_1	2531201	2531300	0.5	1	0.5	0.5	0.5	0.5	0.5	0.5	1	1
Bhaga_1	2531301	2531400	1	0.5	1	0.5	1	0.5	1	1	1	1
Bhaga_1	2532301	2532400	1	0.5	1	1	1	0.5	0.5	1	1	1
Bhaga_1	2532401	2532500	1	0.5	1	1	1	0.5	0.5	1	1	1
Bhaga_1	2534801	2534900	0.5	0.5	1	1	0.5	0.5	0.5	1	1	0.5
Bhaga_1	2537001	2537100	0.5	1	1	0.5	0.5	1	1	1	1	1
Bhaga_1	2537501	2537600	0.5	1	1	0.5	1	1	1	1	0.5	0.5
Bhaga_1	2538501	2538600	0.5	0.5	1	0.5	0.5	1	0.5	1	1	0.5
Bhaga_1	2539301	2539400	1	0.5	0.5	0.5	1	0.5	1	1	0.5	1
Bhaga_1	2539401	2539500	0.5	1	0.5	1	0.5	0.5	1	1	1	1
Bhaga_1	2541601	2541700	0.5	1	1	0.5	0.5	1	0.5	1	0.5	0.5
Bhaga_1	2546401	2546500	0	0	0.5	0	0	0.5	0	0	0	0
Bhaga_1	2546501	2546600	0	0	0.5	0	0	0.5	0	0	0	0
Bhaga_1	2549801	2549900	0	0	0.5	0.5	0	0	0	0	0.5	0
Bhaga_1	2550101	2550200	1	0.5	1	1	1	1	0.5	1	1	0.5
Bhaga_1	2552401	2552500	0.5	0	0	0.5	0	0.5	0	0	0	0.5
Bhaga_1	2552501	2552600	0.5	0	0	0.5	0	0.5	0	0	0	0.5
Bhaga_1	2557501	2557600	1	0.5	1	0.5	1	1	1	1	0.5	1
Bhaga_1	2557601	2557700	0.5	0.5	0.5	0	0.5	0.5	0.5	0	0.5	0
Bhaga_1	2557701	2557800	1	0.5	0.5	0.5	1	0.5	1	1	1	1
Bhaga_1	2561201	2561300	1	1	1	0.5	1	0.5	1	1	0.5	1
Bhaga_1	2561301	2561400	1	1	1	0.5	1	0.5	0.5	1	0.5	1
Bhaga_1	2562601	2562700	0.5	1	1	0.5	1	1	1	0.5	1	0.5
Bhaga_1	2591501	2591600	1	1	1	1	1	0.5	0.5	0.5	1	1
Bhaga_1	2607701	2607800	0.5	0.5	1	1	0.5	1	1	0.5	1	0.5
Bhaga_1	2611201	2611300	0.5	0.5	1	0.5	0.5	0.5	1	1	0.5	0.5
Bhaga_1	2611301	2611400	0.5	0.5	0.5	0.5	0.5	0.5	1	1	0.5	0.5
Bhaga_1	2611701	2611800	0.5	1	1	1	1	1	1	1	1	0.5
Bhaga_1	2611801	2611900	0.5	0.5	1	1	1	1	0.5	0.5	0.5	0.5
Bhaga_1	2612101	2612200	1	1	1	1	0.5	1	1	0.5	1	1
Bhaga_1	2612201	2612300	0.5	0.5	1	1	0.5	1	1	0.5	0.5	0.5
Bhaga_1	2612301	2612400	0.5	0	0.5	0.5	0.5	0.5	0.5	0.5	0	0.5
Bhaga_1	2613401	2613500	1	0.5	1	1	1	1	0.5	1	1	0.5
Bhaga_1	2613801	2613900	1	0.5	1	0.5	1	1	1	0.5	0.5	1
Bhaga_1	2614101	2614200	1	1	0.5	0.5	0.5	1	0.5	1	1	0.5
Bhaga_1	2614201	2614300	1	1	1	1	0.5	0.5	1	1	1	1
Bhaga_1	2614801	2614900	0.5	0.5	1	0.5	1	1	1	1	0.5	0.5
Bhaga_1	2615001	2615100	0.5	1	1	1	1	1	1	0.5	1	1
Bhaga_1	2616201	2616300	1	0.5	1	1	1	1	1	1	0.5	1
Bhaga_1	2616901	2617000	1	1	1	1	1	0.5	1	0.5	0.5	1
Bhaga_1	2618501	2618600	1	1	0.5	1	1	1	1	1	1	0.5
Bhaga_1	2618801	2618900	0.5	0	0.5	0.5	0.5	0.5	0.5	0.5	0.5	0
Bhaga_1	2621401	2621500	1	1	1	1	0.5	0.5	0.5	0.5	1	1
Bhaga_1	2621601	2621700	1	1	1	1	0.5	1	1	1	0.5	1
Bhaga_1	2622601	2622700	0.5	1	1	1	0.5	1	1	1	0.5	0.5
Bhaga_1	2630601	2630700	0	0	0	0	0	0	0	0.5	0.5	0
Bhaga_1	2630701	2630800	0	0	0	0	0	0.5	0	0.5	0.5	0
Bhaga_1	2631001	2631100	0.5	0.5	0.5	0.5	1	1	1	1	0.5	0.5
Bhaga_1	2639001	2639100	1	1	0.5	0.5	1	1	1	1	1	1
Bhaga_1	2639101	2639200	1	1	0.5	0.5	1	1	1	1	1	1
Bhaga_1	2649101	2649200	0.5	0	0.5	0	0	0	0	0.5	0	0
Bhaga_1	2657601	2657700	1	1	0.5	0.5	1	0.5	0.5	0.5	0.5	0.5
Bhaga_1	2657701	2657800	0.5	0	0.5	0.5	0.5	0.5	0.5	0.5	0	0
Bhaga_1	2659101	2659200	0.5	0.5	0.5	1	0.5	1	0.5	1	0.5	1
Bhaga_1	2659301	2659400	1	0.5	1	1	1	0.5	1	1	1	0.5
Bhaga_1	2662801	2662900	1	0.5	0.5	1	1	1	0.5	1	1	0.5
Bhaga_1	2663201	2663300	1	0.5	0.5	0.5	1	1	1	1	1	1
Bhaga_1	2663301	2663400	0	0	0	0	0.5	0	0	0.5	0.5	0
Bhaga_1	2664001	2664100	1	1	1	1	1	1	0.5	1	0.5	0.5
Bhaga_1	2664601	2664700	1	1	0.5	0.5	1	1	0.5	1	1	1
Bhaga_1	2665301	2665400	1	0.5	1	0.5	1	1	1	0.5	1	1
Bhaga_1	2665601	2665700	1	1	0.5	0.5	1	1	1	1	1	1
Bhaga_1	2665701	2665800	1	0.5	1	0.5	1	1	1	1	1	1
Bhaga_1	2665801	2665900	0.5	0.5	0.5	0.5	1	1	0.5	0.5	1	0.5
Bhaga_1	2668001	2668100	1	1	1	1	1	1	0.5	1	1	1
Bhaga_1	2672401	2672500	0.5	0.5	1	0.5	0.5	0.5	1	0.5	1	0.5
Bhaga_1	2675201	2675300	0.5	0.5	1	0.5	0.5	1	1	1	1	1
Bhaga_1	2679501	2679600	0.5	0.5	1	1	0.5	0.5	0.5	1	1	0.5
Bhaga_1	2685101	2685200	0.5	0.5	0.5	0.5	0	0.5	0.5	0	0.5	0.5
Bhaga_1	2696901	2697000	1	1	1	1	1	0.5	1	1	1	1
Bhaga_1	2697001	2697100	1	1	1	1	1	0.5	1	1	1	1
Bhaga_1	2699201	2699300	0.5	0.5	1	1	1	0.5	0.5	1	0.5	1
Bhaga_1	2701301	2701400	1	1	0.5	0.5	1	1	1	1	1	0.5
Bhaga_1	2710401	2710500	1	0.5	0.5	0.5	0.5	0.5	1	0.5	0.5	1
Bhaga_1	2714401	2714500	0.5	1	1	0.5	0.5	1	1	1	1	1
Bhaga_1	2720601	2720700	1	0.5	1	0.5	0.5	1	0.5	0.5	0.5	0.5
Bhaga_1	2726401	2726500	0.5	0.5	0.5	1	1	1	1	1	0.5	0.5
Bhaga_1	2727201	2727300	1	0.5	0.5	1	1	0.5	0.5	0.5	1	1
Bhaga_1	2728001	2728100	0.5	0.5	1	1	0.5	0.5	1	0.5	1	1
Bhaga_1	2728201	2728300	0.5	1	0.5	0.5	0.5	1	0.5	1	0.5	0.5
Bhaga_1	2729301	2729400	1	1	1	1	0.5	1	1	0.5	1	0.5
Bhaga_1	2729401	2729500	0.5	0.5	1	1	1	1	1	0.5	1	0.5
Bhaga_1	2729601	2729700	1	1	1	1	1	0.5	1	1	1	1
Bhaga_1	2730201	2730300	1	1	1	1	1	1	1	1	1	1
Bhaga_1	2734801	2734900	0.5	1	0.5	1	0.5	0.5	1	0.5	0.5	0.5
Bhaga_1	2734901	2735000	1	1	0.5	1	1	0.5	0.5	0.5	1	0.5
Bhaga_1	2735001	2735100	0.5	0.5	1	0.5	0.5	1	1	1	1	0.5
Bhaga_1	2735201	2735300	0.5	0.5	0.5	0.5	0.5	0.5	0.5	0.5	0	0.5
Bhaga_1	2737501	2737600	1	1	1	0.5	1	1	1	1	1	1
Bhaga_1	2737601	2737700	0.5	0.5	1	0.5	1	0.5	1	0.5	0.5	1
Bhaga_1	2738001	2738100	0.5	0	0.5	0	0	0.5	0.5	0	0.5	0
Bhaga_1	2738101	2738200	0	0	0.5	0	0	0.5	0.5	0	0.5	0
Bhaga_1	2738201	2738300	0	0	0.5	0	0	0.5	0.5	0	0.5	0
Bhaga_1	2738301	2738400	0	0	0.5	0	0	0.5	0.5	0	0.5	0
Bhaga_1	2738601	2738700	1	1	0.5	0.5	1	1	1	0.5	1	0.5
Bhaga_1	2738801	2738900	0	0.5	0	0.5	0.5	0.5	0	0.5	0.5	0.5
Bhaga_1	2743201	2743300	0.5	0.5	0.5	0.5	0.5	0.5	1	0.5	0.5	1
Bhaga_1	2743501	2743600	0.5	1	1	0.5	0.5	1	1	0.5	1	1
Bhaga_1	2750601	2750700	0.5	1	1	0.5	0.5	0.5	0.5	0.5	0.5	1
Bhaga_1	2754501	2754600	1	1	0.5	1	1	0.5	0.5	0.5	1	1
Bhaga_1	2754901	2755000	1	0.5	1	1	1	1	1	0.5	0.5	1
Bhaga_1	2759201	2759300	1	0.5	1	1	1	0.5	1	0.5	1	1
Bhaga_1	2759401	2759500	1	1	0.5	0.5	1	0.5	1	0.5	0.5	1
Bhaga_1	2759501	2759600	1	1	1	0.5	1	1	1	1	1	1
Bhaga_1	2759701	2759800	1	0.5	0.5	0.5	0.5	1	0.5	0.5	1	0.5
Bhaga_1	2760401	2760500	0	0	0	0.5	0.5	0.5	0.5	0	0	0
Bhaga_1	2760601	2760700	0.5	1	1	1	0.5	1	1	0.5	0.5	1
Bhaga_1	2761001	2761100	0.5	1	1	1	0.5	1	1	0.5	0.5	1
Bhaga_1	2761201	2761300	0.5	1	1	1	0.5	0.5	1	0.5	0.5	1
Bhaga_1	2761401	2761500	1	1	0.5	0.5	0.5	1	1	1	1	0.5
Bhaga_1	2761501	2761600	0.5	1	1	1	0.5	1	1	1	1	1
Bhaga_1	2761801	2761900	1	1	0.5	1	0.5	1	1	0.5	1	0.5
Bhaga_1	2762301	2762400	1	1	0.5	0.5	1	0.5	1	0.5	1	1
Bhaga_1	2762501	2762600	1	1	1	1	1	0.5	1	0.5	1	0.5
Bhaga_1	2762701	2762800	0.5	0.5	0.5	0.5	0.5	1	1	0.5	1	1
Bhaga_1	2762801	2762900	0.5	0.5	0.5	0.5	0.5	1	1	0.5	1	0.5
Bhaga_1	2765701	2765800	1	0.5	0.5	0.5	0.5	1	1	0.5	0.5	1
Bhaga_1	2765801	2765900	1	0.5	0.5	1	1	1	0.5	1	0.5	1
Bhaga_1	2766801	2766900	1	0.5	0.5	0.5	1	1	0.5	1	0.5	1
Bhaga_1	2767301	2767400	1	0.5	1	0.5	1	0.5	0.5	0.5	0.5	1
Bhaga_1	2768001	2768100	0.5	0.5	0.5	0.5	0.5	0.5	0.5	0	0	0
Bhaga_1	2768201	2768300	0.5	0.5	0.5	1	0.5	1	0.5	0.5	1	1
Bhaga_1	2768301	2768400	1	1	0.5	0.5	0.5	1	0.5	0.5	0.5	0.5
Bhaga_1	2779601	2779700	1	1	0.5	1	0.5	1	1	1	1	1
Bhaga_1	2779701	2779800	0.5	0.5	0.5	0.5	0.5	0.5	0.5	1	1	0.5
Bhaga_1	2779901	2780000	1	1	0.5	1	1	1	0.5	1	1	1
Bhaga_1	2780201	2780300	1	1	0.5	1	0.5	1	1	1	0.5	1
Bhaga_1	2781201	2781300	0.5	1	1	1	1	0.5	0.5	0.5	0.5	1
Bhaga_1	2782201	2782300	0.5	0.5	0.5	1	0.5	0.5	1	0.5	0.5	1
Bhaga_1	2782301	2782400	0.5	0.5	0.5	1	0.5	0.5	1	0.5	0.5	1
Bhaga_1	2782501	2782600	0.5	0.5	0.5	0.5	1	0.5	0.5	1	0.5	1
Bhaga_1	2782601	2782700	0.5	0.5	0.5	1	1	0.5	1	1	0.5	1
Bhaga_1	2782701	2782800	0.5	0.5	0.5	0.5	1	0.5	0.5	1	0.5	1
Bhaga_1	2783601	2783700	0	0.5	0	0	0.5	0	0	0	0	0.5
Bhaga_1	2784401	2784500	1	1	0.5	0.5	1	0.5	1	1	1	1
Bhaga_1	2784501	2784600	0.5	0.5	0.5	0.5	1	0.5	1	1	0.5	0.5
Bhaga_1	2784901	2785000	0.5	1	1	1	0.5	1	1	0.5	1	0.5
Bhaga_1	2785501	2785600	1	0.5	0.5	1	1	0.5	0.5	0.5	1	0.5
Bhaga_1	2789301	2789400	0.5	0.5	0	0.5	0.5	0.5	0.5	0	0.5	0.5
Bhaga_1	2790701	2790800	1	1	0.5	1	0.5	0.5	0.5	0.5	0.5	0.5
Bhaga_1	2796501	2796600	0.5	0.5	1	0.5	1	1	0.5	1	1	1
Bhaga_1	2796701	2796800	1	1	1	0.5	1	0.5	0.5	1	1	1
Bhaga_1	2796801	2796900	1	1	1	0.5	1	0.5	1	1	1	1
Bhaga_1	2799701	2799800	0	0	0	0.5	0	0	0	0	0.5	0.5
Bhaga_1	2799801	2799900	0	0	0	0.5	0	0	0	0	0	0.5
Bhaga_1	2800401	2800500	1	1	1	1	1	0.5	1	0.5	1	1
Bhaga_1	2800601	2800700	0	0	0	0	0.5	0	0	0	0.5	0
Bhaga_1	2800801	2800900	1	0.5	1	0.5	1	1	0.5	1	0.5	0.5
Bhaga_1	2801501	2801600	0	0	0.5	0.5	0.5	0	0	0.5	0	0.5
Bhaga_1	2802001	2802100	1	0.5	0.5	1	0.5	0.5	0.5	1	0.5	0.5
Bhaga_1	2802101	2802200	1	1	0.5	0.5	0.5	0.5	1	0.5	0.5	1
Bhaga_1	2802901	2803000	0.5	0.5	1	1	0.5	1	0.5	0.5	1	1
Bhaga_1	2803001	2803100	0.5	0.5	1	1	0.5	1	0.5	1	0.5	0.5
Bhaga_1	2805701	2805800	0.5	1	1	0.5	0.5	1	1	1	1	1
Bhaga_1	2806501	2806600	0.5	0	0	0	0	0	0.5	0	0.5	0
Bhaga_1	2810901	2811000	0.5	0.5	0.5	0.5	1	1	1	0.5	0.5	0.5
Bhaga_1	2811501	2811600	1	0.5	0.5	0.5	0.5	0.5	0.5	0.5	0.5	1
Bhaga_1	2818601	2818700	1	1	1	1	0.5	1	0.5	1	1	1
Bhaga_1	2818701	2818800	1	0.5	1	1	1	1	0.5	1	1	1
Bhaga_1	2818801	2818900	0	0.5	0	0.5	0.5	0.5	0	0.5	0.5	0.5
Bhaga_1	2820101	2820200	1	0.5	1	0.5	1	0.5	0.5	0.5	1	0.5
Bhaga_1	2830901	2831000	0.5	0.5	0	0.5	0.5	0	0.5	0.5	0	0.5
Bhaga_1	2841801	2841900	0.5	1	1	1	0.5	1	1	1	1	1
Bhaga_1	2851101	2851200	0.5	1	0.5	1	1	1	1	1	1	0.5
Bhaga_1	2853101	2853200	1	0.5	1	1	0.5	1	1	1	1	0.5
Bhaga_1	2855301	2855400	0.5	1	0.5	0.5	0.5	1	1	0.5	1	0.5
Bhaga_1	2855501	2855600	0.5	0.5	0.5	0.5	0	0.5	0.5	0.5	0.5	0
Bhaga_1	2861301	2861400	0.5	0.5	1	0.5	0.5	1	1	1	0.5	0.5
Bhaga_1	2861401	2861500	0.5	0.5	1	0.5	0.5	1	1	1	0.5	0.5
Bhaga_1	2861601	2861700	0.5	1	1	1	0.5	0.5	1	0.5	0.5	0.5
Bhaga_1	2873101	2873200	1	1	1	0.5	1	0.5	0.5	1	0.5	1
Bhaga_1	2881001	2881100	0.5	1	1	1	0.5	1	1	1	1	0.5
Bhaga_1	2881401	2881500	1	1	1	1	0.5	1	1	1	1	0.5
Bhaga_1	2887001	2887100	1	1	0.5	1	1	1	0.5	1	1	0.5
Bhaga_1	2891501	2891600	0	0	0	0	0	0	0.5	0	0.5	0.5
Bhaga_1	2891601	2891700	0	0.5	0.5	0.5	0	0.5	0.5	0.5	0.5	0.5
Bhaga_1	2892001	2892100	1	1	1	1	1	1	0.5	0.5	0.5	0.5
Bhaga_1	2892201	2892300	0.5	0.5	0.5	1	1	1	0.5	0.5	0.5	1
Bhaga_1	2892401	2892500	0.5	0.5	0.5	0.5	0.5	0	0.5	0	0.5	0.5
Bhaga_1	2893201	2893300	0.5	0.5	0.5	0	0	0.5	0	0	0	0
Bhaga_1	2906501	2906600	0.5	1	0.5	1	1	0.5	1	1	0.5	1
Bhaga_1	2907301	2907400	0	0	0	0	0.5	0.5	0.5	0	0	0.5
Bhaga_1	2908101	2908200	1	1	1	1	0.5	0.5	1	1	1	0.5
Bhaga_1	2908501	2908600	0.5	0.5	0.5	0.5	0.5	1	0.5	0.5	0.5	0.5
Bhaga_1	2908601	2908700	0.5	0.5	0.5	1	1	1	1	1	0.5	0.5
Bhaga_1	2918401	2918500	0.5	0	0.5	0.5	0.5	0.5	0	0.5	0.5	0
Bhaga_1	2921201	2921300	1	1	1	1	0.5	1	0.5	0.5	1	1
Bhaga_1	2924701	2924800	1	1	0.5	0.5	0.5	1	1	1	1	1
Bhaga_1	2928201	2928300	0.5	1	1	1	0.5	1	1	1	0.5	0.5
Bhaga_1	2928401	2928500	0.5	1	1	0.5	0.5	1	1	1	0.5	0.5
Bhaga_1	2932501	2932600	1	0.5	1	1	0.5	1	1	1	0.5	1
Bhaga_1	2939501	2939600	1	1	0.5	0.5	0.5	1	0.5	0.5	1	1
Bhaga_1	2940901	2941000	0	0.5	0	0	0.5	0	0	0.5	0	0
Bhaga_1	2948801	2948900	0.5	1	0.5	1	1	0.5	1	1	1	1
Bhaga_1	2953301	2953400	0.5	0.5	1	1	1	0.5	1	0.5	0.5	1
Bhaga_1	2957101	2957200	1	0.5	1	0.5	1	1	0.5	1	1	1
Bhaga_1	2958901	2959000	1	0.5	1	1	0.5	0.5	0.5	0.5	1	1
Bhaga_1	2964301	2964400	0	0	0	0.5	0	0	0	0	0.5	0
Bhaga_1	2967301	2967400	1	1	1	0.5	1	0.5	1	0.5	1	0.5
Bhaga_1	2968401	2968500	0.5	1	0.5	1	1	0.5	0.5	0.5	1	1
Bhaga_1	2973801	2973900	1	1	1	0.5	0.5	1	1	1	1	0.5
Bhaga_1	2981901	2982000	0.5	0	0.5	0.5	0.5	0.5	0	0	0.5	0.5
Bhaga_1	2988701	2988800	0	0.5	0	0	0	0	0	0	0	0
Bhaga_1	2996401	2996500	0	0	0.5	0	0	0.5	0.5	0	0.5	0
Bhaga_1	3003301	3003400	0.5	0.5	0.5	1	1	1	0.5	0.5	0.5	0.5
Bhaga_1	3014301	3014400	0.5	0.5	1	1	1	1	1	1	1	1
Bhaga_1	3024301	3024400	1	1	0.5	1	0.5	1	1	1	1	1
Bhaga_1	3027901	3028000	0.5	0.5	1	1	1	0.5	0.5	1	0.5	0.5
Bhaga_1	3028301	3028400	0	0	0	0.5	0.5	0.5	0	0	0.5	0.5
Bhaga_1	3028501	3028600	0.5	0.5	1	1	0.5	1	0.5	1	1	1
Bhaga_1	3028701	3028800	0.5	0	0.5	0.5	0.5	0.5	0	0.5	0.5	0.5
Bhaga_1	3030701	3030800	0	0	0	0	0	0	0	0.5	0	0.5
Bhaga_1	3036101	3036200	0	0.5	0.5	0	0	0.5	0.5	0	0	0
Bhaga_1	3038701	3038800	0.5	1	1	1	1	1	0.5	1	1	0.5
Bhaga_1	3038901	3039000	0.5	1	0.5	0.5	1	1	1	1	1	0.5
Bhaga_1	3041701	3041800	0	0	0	0.5	0.5	0	0	0	0	0.5
Bhaga_1	3041801	3041900	0.5	0.5	0.5	1	0.5	0.5	0.5	1	1	0.5
Bhaga_1	3042701	3042800	0.5	0.5	1	1	0.5	1	0.5	0.5	1	0.5
Bhaga_1	3042801	3042900	0.5	0.5	1	1	0.5	1	0.5	0.5	1	0.5
Bhaga_1	3044401	3044500	1	0.5	1	1	1	1	1	1	1	0.5
Bhaga_1	3051101	3051200	0.5	1	0.5	0.5	1	1	0.5	1	1	0.5
Bhaga_1	3051201	3051300	0.5	1	1	0.5	0.5	1	0.5	1	1	1
Bhaga_1	3051901	3052000	1	1	1	0.5	1	1	1	0.5	1	1
Bhaga_1	3052001	3052100	1	1	1	0.5	1	1	0.5	0.5	1	1
Bhaga_1	3052601	3052700	0.5	0.5	1	0.5	1	0.5	0.5	0.5	0.5	0.5
Bhaga_1	3054701	3054800	0.5	0.5	0.5	0.5	0.5	0.5	0.5	0	0	0
Bhaga_1	3055801	3055900	1	0.5	0.5	1	0.5	0.5	0.5	0.5	0.5	0.5
Bhaga_1	3057801	3057900	0.5	0.5	0	0	0.5	0.5	0	0.5	0.5	0
Bhaga_1	3058301	3058400	0	0	0.5	0.5	0.5	0.5	0	0.5	0	0.5
Bhaga_1	3058401	3058500	0	0.5	0.5	0.5	0.5	0.5	0.5	0.5	0	0.5
Bhaga_1	3090401	3090500	0	0	0	0.5	0.5	0.5	0.5	0.5	0	0
Bhaga_1	3092201	3092300	0.5	0.5	1	0.5	1	1	1	1	1	0.5
Bhaga_1	3101901	3102000	0.5	1	1	1	0.5	1	1	0.5	1	1
Bhaga_1	3102001	3102100	0.5	0.5	1	1	0.5	1	1	1	1	1
Bhaga_1	3102101	3102200	0.5	0.5	1	1	0.5	1	1	1	1	1
Bhaga_1	3104201	3104300	0	0.5	0.5	0	0	0	0	0	0	0
Bhaga_1	3104301	3104400	0.5	0	0.5	0	0	0	0.5	0	0	0
Bhaga_1	3105301	3105400	0	0.5	0	0	0.5	0.5	0	0	0.5	0.5
Bhaga_1	3116001	3116100	0.5	0.5	1	1	1	1	1	1	1	1
Bhaga_1	3116901	3117000	0.5	1	0.5	1	0.5	0.5	1	0.5	0.5	0.5
Bhaga_1	3117001	3117100	0	0	0	0	0	0	0	0	0	0.5
Bhaga_1	3119701	3119800	1	0.5	0.5	1	0.5	1	0.5	0.5	0.5	0.5
Bhaga_1	3119801	3119900	1	1	1	1	1	1	0.5	0.5	0.5	1
Bhaga_1	3123201	3123300	0.5	1	1	1	1	1	1	1	1	0.5
Bhaga_1	3126201	3126300	0.5	0.5	1	1	0.5	1	1	0.5	1	1
Bhaga_1	3131601	3131700	1	1	1	0.5	0.5	1	1	1	1	0.5
Bhaga_1	3131801	3131900	0.5	0.5	0	0.5	0	0.5	0.5	0	0.5	0
Bhaga_1	3137201	3137300	1	1	0.5	1	0.5	1	1	0.5	0.5	1
Bhaga_1	3142901	3143000	0.5	0.5	1	1	1	1	0.5	0.5	1	1
Bhaga_1	3143401	3143500	0.5	0.5	1	1	1	0.5	1	1	1	1
Bhaga_1	3145301	3145400	0.5	0.5	0.5	0.5	0	0.5	0.5	0.5	0.5	0
Bhaga_1	3149001	3149100	1	0.5	0.5	0.5	0.5	1	0.5	0.5	1	1
Bhaga_1	3157401	3157500	1	0.5	1	1	1	1	1	0.5	1	0.5
Bhaga_1	3161201	3161300	0.5	0.5	1	1	0.5	1	0.5	0.5	1	0.5
Bhaga_1	3172001	3172100	0.5	0.5	1	1	1	1	0.5	1	1	0.5
Bhaga_1	3173401	3173500	1	1	1	1	1	1	1	1	0.5	0.5
Bhaga_1	3189401	3189500	0.5	0.5	0.5	0.5	0.5	0.5	0.5	1	1	0.5
Bhaga_1	3191001	3191100	1	0.5	0.5	0.5	1	1	0.5	1	0.5	1
Bhaga_1	3192501	3192600	0.5	1	1	1	1	1	1	0.5	1	1
Bhaga_1	3196601	3196700	0	0.5	0.5	0	0	0.5	0.5	0	0.5	0
Bhaga_1	3196701	3196800	0	0.5	0.5	0	0	0.5	0.5	0	0	0
Bhaga_1	3196801	3196900	0	0.5	0.5	0	0	0.5	0.5	0	0	0
Bhaga_1	3196901	3197000	0	0	0.5	0	0	0.5	0.5	0	0.5	0.5
Bhaga_1	3197001	3197100	0	0	0.5	0.5	0	0.5	0.5	0.5	0.5	0.5
Bhaga_1	3200501	3200600	0.5	0.5	0.5	0.5	0.5	1	1	1	0.5	0.5
Bhaga_1	3200601	3200700	0.5	0.5	1	1	0.5	1	1	1	0.5	1
Bhaga_1	3204701	3204800	1	0.5	1	1	1	1	1	1	1	0.5
Bhaga_1	3211701	3211800	0.5	0	0.5	0.5	0.5	0.5	0.5	0	0.5	0.5
Bhaga_1	3212701	3212800	0	0	0.5	0.5	0	0.5	0.5	0.5	0.5	0
Bhaga_1	3214301	3214400	0.5	0.5	1	0.5	0.5	0.5	1	1	0.5	0.5
Bhaga_1	3214401	3214500	0.5	0.5	1	1	0.5	0.5	0.5	1	0.5	0.5
Bhaga_1	3214501	3214600	0.5	1	1	1	1	0.5	1	1	1	1
Bhaga_1	3214701	3214800	1	0.5	1	1	1	0.5	1	1	1	1
Bhaga_1	3220101	3220200	0.5	0	0.5	0	0	0	0	0	0	0.5
Bhaga_1	3220901	3221000	1	1	1	1	1	0.5	0.5	0.5	1	0.5
Bhaga_1	3221301	3221400	1	1	1	1	1	1	0.5	1	0.5	1
Bhaga_1	3224201	3224300	1	1	0.5	0.5	1	1	0.5	1	1	1
Bhaga_1	3228201	3228300	0.5	1	1	1	1	0.5	0.5	1	0.5	0.5
Bhaga_1	3230801	3230900	0	0	0.5	0	0.5	0	0.5	0.5	0	0.5
Bhaga_1	3239501	3239600	1	1	0.5	1	1	0.5	0.5	0.5	1	1
Bhaga_1	3239601	3239700	1	0.5	0.5	1	0.5	0.5	0.5	0.5	1	1
Bhaga_1	3239801	3239900	1	1	0.5	1	1	0.5	0.5	1	1	1
Bhaga_1	3242201	3242300	0.5	0.5	0	0	0.5	0.5	0	0.5	0.5	0
Bhaga_1	3243301	3243400	0.5	0.5	1	0.5	1	1	1	1	1	1
Bhaga_1	3244301	3244400	0.5	0.5	1	0.5	0.5	0.5	0.5	0.5	0.5	0.5
Bhaga_1	3254701	3254800	0	0.5	0	0.5	0.5	0.5	0	0	0.5	0.5
Bhaga_1	3259501	3259600	0.5	0	0	0.5	0.5	0	0	0	0	0
Bhaga_1	3259601	3259700	0.5	0.5	0.5	0.5	1	1	0.5	0.5	1	0.5
Bhaga_1	3265201	3265300	0	0	0	0	0	0.5	0	0	0	0.5
Bhaga_1	3265301	3265400	0	0	0	0	0	0.5	0.5	0	0.5	0.5
Bhaga_1	3266401	3266500	0.5	1	0.5	0.5	0.5	0.5	1	0.5	0.5	1
Bhaga_1	3267801	3267900	0.5	0.5	1	1	1	1	1	1	1	1
Bhaga_1	3270501	3270600	0.5	0.5	1	0.5	1	1	1	1	1	1
Bhaga_1	3270601	3270700	1	0.5	1	0.5	1	1	1	1	1	1
Bhaga_1	3272201	3272300	1	1	0.5	1	0.5	1	0.5	1	0.5	0.5
Bhaga_1	3273401	3273500	1	1	1	0.5	0.5	1	0.5	1	1	1
Bhaga_1	3274401	3274500	0.5	0	0	0.5	0	0	0	0	0.5	0
Bhaga_1	3275401	3275500	1	0.5	1	0.5	0.5	1	0.5	0.5	1	1
Bhaga_1	3276401	3276500	1	1	0.5	0.5	1	0.5	0.5	0.5	1	1
Bhaga_1	3279401	3279500	1	1	0.5	0.5	1	1	0.5	1	1	1
Bhaga_1	3281901	3282000	1	0.5	0.5	1	0.5	1	1	1	1	1
Bhaga_1	3282101	3282200	0.5	0.5	1	0.5	1	0.5	0.5	0.5	1	1
Bhaga_1	3284301	3284400	1	1	0.5	0.5	0.5	0.5	1	0.5	0.5	0.5
Bhaga_1	3288901	3289000	0	0	0	0	0.5	0	0	0	0.5	0
Bhaga_1	3298101	3298200	1	1	1	0.5	1	0.5	1	0.5	1	0.5
Bhaga_1	3304001	3304100	0.5	0.5	0.5	0.5	0.5	0.5	0.5	1	1	1
Bhaga_1	3309601	3309700	0	0.5	0	0	0.5	0	0.5	0.5	0.5	0.5
Bhaga_1	3319001	3319100	0.5	0.5	1	1	0.5	1	0.5	1	0.5	0.5
Bhaga_1	3319501	3319600	0	0	0.5	0	0.5	0.5	0.5	0	0.5	0
Bhaga_1	3319701	3319800	0.5	1	1	0.5	0.5	1	0.5	0.5	0.5	1
Bhaga_1	3321201	3321300	0	0.5	0	0	0.5	0	0	0	0	0
Bhaga_1	3321401	3321500	0	0	0	0	0	0	0	0.5	0	0.5
Bhaga_1	3325801	3325900	0	0	0.5	0.5	0	0	0	0	0	0
Bhaga_1	3325901	3326000	1	1	1	1	1	1	0.5	1	1	0.5
Bhaga_1	3327101	3327200	0.5	0.5	0	0.5	0	0.5	0	0.5	0.5	0
Bhaga_1	3327201	3327300	1	1	0.5	1	0.5	1	0.5	1	0.5	1
Bhaga_1	3339401	3339500	1	0.5	0.5	1	1	0.5	1	0.5	0.5	1
Bhaga_1	3339701	3339800	0.5	1	1	0.5	1	1	1	0.5	1	0.5
Bhaga_1	3344401	3344500	1	1	0.5	0.5	1	1	1	0.5	0.5	0.5
Bhaga_1	3344501	3344600	1	1	1	0.5	1	1	1	0.5	0.5	0.5
Bhaga_1	3365301	3365400	0.5	0.5	0.5	1	1	1	1	1	1	0.5
Bhaga_1	3365801	3365900	0.5	1	1	1	0.5	0.5	1	1	0.5	0.5
Bhaga_1	3382301	3382400	1	1	0.5	1	0.5	1	0.5	1	0.5	1
Bhaga_1	3385201	3385300	0.5	0.5	0	0	0	0.5	0	0	0	0
Bhaga_1	3386801	3386900	0.5	0.5	0	0	0.5	0	0.5	0.5	0.5	0.5
Bhaga_1	3387001	3387100	0.5	0.5	1	0.5	0.5	1	1	1	0.5	1
Bhaga_1	3390901	3391000	0	0	0	0	0	0	0	0.5	0	0
Bhaga_1	3392901	3393000	0	0.5	0.5	0	0	0	0	0.5	0	0
Bhaga_1	3399001	3399100	0	0.5	0	0	0.5	0.5	0	0.5	0	0
Bhaga_1	3403001	3403100	0	0.5	0	0	0.5	0	0.5	0.5	0	0
Bhaga_1	3406301	3406400	1	1	1	0.5	1	0.5	0.5	0.5	0.5	1
Bhaga_1	3411801	3411900	0	0	0.5	0	0	0	0	0.5	0	0.5
Bhaga_1	3412301	3412400	0.5	1	0.5	1	1	1	0.5	0.5	0.5	1
Bhaga_1	3418701	3418800	0	0	0	0	0.5	0.5	0	0	0.5	0
Bhaga_1	3419101	3419200	0.5	0	0	0	0.5	0	0	0	0	0
Bhaga_1	3423601	3423700	0.5	1	0.5	1	1	1	1	1	1	0.5
Bhaga_1	3461401	3461500	0.5	0.5	0	0.5	0.5	0.5	0	0.5	0.5	0
Bhaga_1	3465001	3465100	1	1	0.5	0.5	1	1	0.5	1	0.5	1
Bhaga_1	3466401	3466500	0	0.5	0	0	0.5	0	0.5	0	0	0.5
Bhaga_1	3468601	3468700	1	0.5	0.5	1	1	0.5	0.5	1	0.5	1
Bhaga_1	3470601	3470700	0.5	1	0.5	0.5	1	0.5	1	1	1	1
Bhaga_1	3470701	3470800	0.5	0.5	0	0	0	0	0	0	0	0
Bhaga_1	3496001	3496100	0.5	1	0.5	1	0.5	1	0.5	1	0.5	0.5
Bhaga_1	3496101	3496200	0.5	0.5	0.5	1	0.5	0.5	1	0.5	0.5	1
Bhaga_1	3497401	3497500	0.5	0.5	1	0.5	0.5	1	0.5	1	0.5	1
Bhaga_1	3499201	3499300	0.5	0.5	0	0	0	0	0	0	0	0.5
Bhaga_1	3501401	3501500	0.5	1	1	0.5	1	1	1	1	1	1
Bhaga_1	3501601	3501700	1	0.5	0.5	0.5	1	1	1	0.5	1	1
Bhaga_1	3512401	3512500	0	0	0	0.5	0.5	0.5	0	0	0.5	0
Bhaga_1	3514201	3514300	0	0	0	0.5	0.5	0.5	0	0.5	0	0
Bhaga_1	3515601	3515700	1	1	1	0.5	0.5	0.5	0.5	1	1	1
Bhaga_1	3516301	3516400	0.5	0.5	0.5	0.5	0.5	0.5	1	0.5	0.5	0.5
Bhaga_1	3522701	3522800	1	0.5	1	1	1	0.5	1	0.5	0.5	0.5
Bhaga_1	3524001	3524100	0.5	0.5	0.5	1	0.5	0.5	0.5	1	1	1
Bhaga_1	3524101	3524200	0.5	1	0.5	1	0.5	0.5	0.5	1	1	1
Bhaga_1	3524201	3524300	1	1	0.5	1	0.5	0.5	0.5	0.5	1	1
Bhaga_1	3524301	3524400	1	1	0.5	1	1	0.5	1	0.5	1	1
Bhaga_1	3524401	3524500	0.5	1	0.5	0.5	1	0.5	1	0.5	1	1
Bhaga_1	3524501	3524600	1	0.5	0.5	0.5	1	0.5	1	0.5	0.5	1
Bhaga_1	3524701	3524800	1	1	1	1	1	1	0.5	0.5	1	1
Bhaga_1	3524801	3524900	1	1	1	1	1	1	0.5	0.5	1	1
Bhaga_1	3525201	3525300	1	1	0.5	1	1	1	0.5	0.5	1	0.5
Bhaga_1	3528301	3528400	1	1	1	0.5	1	1	1	1	0.5	1
Bhaga_1	3531601	3531700	0	0	0.5	0.5	0	0	0.5	0.5	0	0.5
Bhaga_1	3532301	3532400	0.5	0.5	1	0.5	0.5	0.5	0.5	0.5	0.5	1
Bhaga_1	3532401	3532500	0.5	0.5	1	0.5	1	0.5	1	1	0.5	0.5
Bhaga_1	3532501	3532600	0.5	0.5	1	1	1	1	1	1	1	0.5
Bhaga_1	3532601	3532700	0.5	0.5	0.5	0.5	1	1	1	1	0.5	0.5
Bhaga_1	3534301	3534400	0	0	0	0	0	0	0	0.5	0	0
Bhaga_1	3534501	3534600	1	1	0.5	1	1	0.5	1	1	0.5	1
Bhaga_1	3534701	3534800	0.5	0.5	0	0.5	0.5	0.5	0.5	0	0	0
Bhaga_1	3539501	3539600	1	0.5	0.5	1	0.5	0.5	0.5	0.5	1	1
Bhaga_1	3539601	3539700	0.5	0	0	0.5	0	0	0	0	0	0
Bhaga_1	3571601	3571700	0.5	0.5	0.5	0.5	1	1	0.5	1	0.5	1
Bhaga_1	3572001	3572100	1	1	1	1	0.5	1	1	1	1	1
Bhaga_1	3573601	3573700	0.5	0.5	1	1	1	1	1	1	1	0.5
Bhaga_1	3574801	3574900	0.5	0.5	0.5	0.5	1	1	0.5	1	0.5	0.5
Bhaga_1	3575001	3575100	1	0.5	1	1	0.5	0.5	1	0.5	0.5	1
Bhaga_1	3576701	3576800	1	1	1	0.5	1	1	0.5	0.5	1	0.5
Bhaga_1	3585501	3585600	0.5	1	0.5	1	1	1	1	1	0.5	1
Bhaga_1	3589201	3589300	1	0.5	0.5	1	1	1	1	0.5	1	1
Bhaga_1	3591001	3591100	0.5	1	1	1	0.5	1	0.5	1	1	1
Bhaga_1	3604301	3604400	1	0.5	0.5	0.5	0.5	1	0.5	0.5	0.5	0.5
Bhaga_1	3606901	3607000	1	1	1	1	1	1	0.5	1	1	1
Bhaga_1	3608701	3608800	0.5	1	1	1	0.5	1	1	1	0.5	1
Bhaga_1	3608801	3608900	1	1	1	1	0.5	1	0.5	1	0.5	1
Bhaga_1	3628601	3628700	0.5	1	1	0.5	0.5	1	0.5	1	1	0.5
Bhaga_1	3631501	3631600	0.5	1	1	1	1	0.5	0.5	1	1	1
Bhaga_1	3634701	3634800	0.5	0.5	1	1	1	0.5	0.5	1	1	1
Bhaga_1	3634801	3634900	1	1	1	1	1	0.5	0.5	1	1	1
Bhaga_1	3643801	3643900	1	1	1	1	0.5	1	1	1	1	0.5
Bhaga_1	3648701	3648800	0.5	1	1	0.5	0.5	0.5	1	0.5	0.5	0.5
Bhaga_1	3648801	3648900	1	1	1	1	0.5	1	1	1	0.5	0.5
Bhaga_1	3667901	3668000	0.5	0.5	1	1	0.5	0.5	1	0.5	1	0.5
Bhaga_1	3671601	3671700	0	0	0	0.5	0	0.5	0.5	0	0	0.5
Bhaga_1	3671701	3671800	0.5	0.5	0.5	0.5	1	0.5	1	0.5	1	0.5
Bhaga_1	3689901	3690000	0.5	1	1	1	0.5	1	0.5	0.5	0.5	1
Bhaga_1	3693501	3693600	0.5	0.5	0.5	1	1	1	1	1	1	1
Bhaga_1	3693801	3693900	0.5	0.5	0.5	1	1	1	1	1	1	1
Bhaga_1	3699701	3699800	0.5	1	0.5	0.5	0.5	0.5	0.5	0.5	0.5	0.5
Bhaga_1	3699801	3699900	0.5	1	1	1	0.5	0.5	0.5	0.5	0.5	0.5
Bhaga_1	3699901	3700000	0.5	0.5	0	0.5	0.5	0.5	0	0.5	0	0.5
Bhaga_1	3703501	3703600	0	0	0	0	0.5	0	0	0	0.5	0.5
Bhaga_1	3704001	3704100	0.5	1	1	1	1	1	1	0.5	0.5	1
Bhaga_1	3720601	3720700	0.5	0.5	1	1	1	1	1	1	0.5	1
Bhaga_1	3720801	3720900	0.5	0.5	0.5	1	0.5	1	0.5	0.5	0.5	0.5
Bhaga_1	3720901	3721000	0.5	0.5	1	1	0.5	1	0.5	0.5	1	0.5
Bhaga_1	3723701	3723800	1	1	0.5	0.5	0.5	0.5	0.5	1	1	1
Bhaga_1	3723801	3723900	0.5	1	0.5	0.5	0.5	0.5	0.5	1	1	1
Bhaga_1	3725101	3725200	0.5	0.5	1	1	0.5	0.5	1	1	0.5	0.5
Bhaga_1	3733801	3733900	0	0	0	0	0	0.5	0	0.5	0	0.5
Bhaga_1	3752801	3752900	0.5	1	1	1	0.5	0.5	1	1	0.5	0.5
Bhaga_1	3753701	3753800	0.5	0.5	0.5	1	0.5	0.5	1	0.5	0.5	1
Bhaga_1	3753801	3753900	0.5	0.5	0.5	1	0.5	0.5	1	0.5	0.5	0.5
Bhaga_1	3759501	3759600	0.5	0.5	0.5	1	0.5	1	1	1	1	1
Bhaga_1	3760601	3760700	1	1	0.5	1	1	1	1	0.5	0.5	1
Bhaga_1	3765901	3766000	0	0	0	0	0	0.5	0	0	0.5	0
Bhaga_1	3766101	3766200	1	0.5	1	1	1	1	0.5	0.5	0.5	1
Bhaga_1	3766601	3766700	0	0	0	0.5	0	0	0	0.5	0	0
Bhaga_1	3769801	3769900	0	0	0	0	0.5	0.5	0	0	0	0
Bhaga_1	3769901	3770000	0.5	0	0	0	0.5	0.5	0	0.5	0	0
Bhaga_1	3770901	3771000	0	0.5	0	0	0.5	0.5	0	0	0	0
Bhaga_1	3772201	3772300	0	0	0	0.5	0.5	0	0.5	0	0	0
Bhaga_1	3777601	3777700	0.5	0.5	0.5	0.5	0.5	0.5	0.5	0.5	0	0.5
Bhaga_1	3780801	3780900	0.5	0.5	0	0.5	0.5	0.5	0.5	0.5	0	0.5
Bhaga_1	3782301	3782400	0	0	0	0.5	0	0	0.5	0.5	0.5	0
Bhaga_1	3783601	3783700	0	0	0.5	0.5	0	0	0.5	0	0	0
Bhaga_1	3783701	3783800	0.5	0	0.5	0.5	0	0	0.5	0	0	0
Bhaga_1	3784901	3785000	0.5	0.5	0.5	0.5	1	1	0.5	0.5	0.5	0.5
Bhaga_1	3785501	3785600	0.5	0.5	0	0.5	0	0.5	0.5	0.5	0.5	0
Bhaga_1	3786101	3786200	1	1	0.5	1	1	1	1	1	0.5	1
Bhaga_1	3786201	3786300	1	1	0.5	1	1	1	1	1	0.5	1
Bhaga_1	3787301	3787400	0.5	0.5	0.5	0.5	0.5	0	0	0.5	0.5	0
Bhaga_1	3790601	3790700	0	0	0	0	0	0	0.5	0.5	0.5	0
Bhaga_1	3793001	3793100	0	0.5	0	0	0.5	0.5	0	0	0	0.5
Bhaga_1	3793701	3793800	0	0.5	0	0	0	0.5	0	0	0	0
Bhaga_1	3793801	3793900	0	0.5	0	0	0	0.5	0	0	0	0
Bhaga_1	3794201	3794300	0.5	0.5	0.5	0.5	0.5	0.5	1	0.5	0.5	1
Bhaga_1	3801001	3801100	0.5	1	1	1	0.5	0.5	1	0.5	0.5	0.5
Bhaga_1	3801601	3801700	1	1	0.5	1	1	1	1	0.5	0.5	1
Bhaga_1	3817201	3817300	0.5	0.5	1	1	0.5	0.5	0.5	0.5	1	0.5
Bhaga_1	3818801	3818900	0	0	0	0	0	0	0	0.5	0.5	0.5
Bhaga_1	3818901	3819000	0	0	0	0	0	0	0	0.5	0.5	0
Bhaga_1	3821601	3821700	0.5	1	1	1	0.5	0.5	1	1	0.5	0.5
Bhaga_1	3827801	3827900	0.5	0.5	0.5	0	0.5	0.5	0	0	0.5	0
Bhaga_1	3828001	3828100	0.5	0.5	0	0	0.5	0.5	0	0	0.5	0.5
Bhaga_1	3831601	3831700	1	0.5	1	0.5	0.5	1	1	1	1	1
Bhaga_1	3832801	3832900	1	0.5	1	0.5	0.5	1	1	1	1	0.5
Bhaga_1	3843901	3844000	1	0.5	1	1	0.5	1	1	1	1	0.5
Bhaga_1	3844001	3844100	1	0.5	1	1	0.5	1	1	1	1	0.5
Bhaga_1	3850901	3851000	0.5	0.5	0	0	0.5	0.5	0	0.5	0	0
Bhaga_1	3852801	3852900	1	1	0.5	1	1	1	1	1	1	0.5
Bhaga_1	3854401	3854500	0	0	0	0	0	0.5	0.5	0	0	0.5
Bhaga_1	3854701	3854800	0	0	0	0.5	0	0.5	0.5	0.5	0.5	0
Bhaga_1	3854801	3854900	0	0	0	0.5	0	0.5	0.5	0.5	0.5	0
Bhaga_1	3856901	3857000	0	0	0	0	0	0	0.5	0.5	0	0
Bhaga_1	3859101	3859200	0.5	0.5	0.5	0.5	0.5	0.5	0	0	0	0
Bhaga_1	3860301	3860400	0.5	1	1	1	0.5	1	1	1	0.5	1
Bhaga_1	3862201	3862300	0	0.5	0	0.5	0	0.5	0	0.5	0.5	0
Bhaga_1	3865601	3865700	1	1	0.5	1	1	1	0.5	1	1	1
Bhaga_1	3865701	3865800	0.5	1	0.5	1	0.5	0.5	0.5	1	0.5	0.5
Bhaga_1	3865801	3865900	0.5	0	0.5	0.5	0	0	0.5	0.5	0.5	0.5
Bhaga_1	3867401	3867500	0	0.5	0	0.5	0	0	0.5	0	0	0
Bhaga_1	3869201	3869300	0.5	0	0	0.5	0	0	0	0	0	0.5
Bhaga_1	3869401	3869500	0.5	0	0	0.5	0	0	0.5	0	0	0
Bhaga_1	3870001	3870100	0.5	1	1	1	0.5	0.5	1	0.5	0.5	0.5
Bhaga_1	3870301	3870400	0.5	1	1	1	0.5	0.5	1	0.5	0.5	0.5
Bhaga_1	3870901	3871000	0.5	0.5	0	0	0.5	0.5	0	0.5	0.5	0.5
Bhaga_1	3871601	3871700	0.5	1	1	1	0.5	0.5	1	0.5	0.5	1
Bhaga_1	3871901	3872000	0.5	1	1	1	0.5	0.5	1	0.5	0.5	1
Bhaga_1	3872201	3872300	1	0.5	0.5	1	1	1	1	1	1	1
Bhaga_1	3872301	3872400	1	0.5	0.5	1	1	1	1	1	1	1
Bhaga_1	3872501	3872600	1	0.5	1	1	1	1	0.5	0.5	1	1
Bhaga_1	3872601	3872700	0.5	0.5	1	1	1	1	0.5	0.5	1	1
Bhaga_1	3894401	3894500	0.5	0	0	0.5	0.5	0	0	0	0	0
Bhaga_1	3908001	3908100	0.5	0.5	1	1	0.5	1	1	0.5	1	0.5
Bhaga_1	3913201	3913300	0	0	0.5	0.5	0.5	0	0.5	0.5	0	0
Bhaga_1	3915301	3915400	0.5	0.5	0.5	1	0.5	1	1	0.5	1	0.5
Bhaga_1	3915401	3915500	0.5	0.5	0.5	1	0.5	1	1	0.5	1	0.5
Bhaga_1	3921401	3921500	1	0.5	1	0.5	1	1	1	1	1	0.5
Bhaga_1	3923201	3923300	0.5	1	1	1	0.5	1	1	1	0.5	1
Bhaga_1	3931901	3932000	0.5	0.5	0	0	0	0	0	0.5	0.5	0
Bhaga_1	3934401	3934500	1	1	1	1	1	1	1	1	1	1
Bhaga_1	3934501	3934600	1	1	0.5	1	1	1	1	1	0.5	1
Bhaga_1	3935601	3935700	0.5	0.5	0.5	1	0.5	0.5	1	0.5	1	0.5
Bhaga_1	3935701	3935800	0.5	1	0.5	1	0.5	1	1	1	1	0.5
Bhaga_1	3936101	3936200	0.5	0	0	0	0.5	0	0	0.5	0.5	0.5
Bhaga_1	3936201	3936300	0.5	0.5	0.5	0.5	1	0.5	0.5	0.5	1	0.5
Bhaga_1	3937901	3938000	1	1	0.5	0.5	0.5	1	0.5	1	1	1
Bhaga_1	3939701	3939800	0	0.5	0.5	0	0	0.5	0.5	0.5	0.5	0.5
Bhaga_1	3940001	3940100	0.5	0.5	1	0.5	0.5	0.5	1	0.5	0.5	0.5
Bhaga_1	3940901	3941000	0.5	0.5	0.5	0.5	0.5	1	1	0.5	1	0.5
Bhaga_1	3941501	3941600	0.5	0.5	0.5	0.5	1	0.5	0.5	1	0.5	0.5
Bhaga_1	3945801	3945900	0.5	0	0	0	0.5	0	0	0.5	0	0
Bhaga_1	3948501	3948600	0.5	0.5	0.5	1	0.5	0.5	0.5	1	0.5	0.5
Bhaga_1	3951701	3951800	0.5	0.5	0.5	1	1	1	1	0.5	1	0.5
Bhaga_1	3951801	3951900	0.5	0.5	0.5	1	1	1	1	0.5	1	0.5
Bhaga_1	3955101	3955200	0.5	1	0.5	0.5	1	0.5	1	0.5	0.5	0.5
Bhaga_1	3956301	3956400	0.5	0.5	0.5	1	0.5	1	1	0.5	1	1
Bhaga_1	3963101	3963200	0.5	0.5	0.5	0.5	0.5	1	0.5	0.5	1	1
Bhaga_1	3964501	3964600	1	1	0.5	0.5	1	1	0.5	1	1	1
Bhaga_1	3965501	3965600	1	0.5	1	1	0.5	1	1	1	1	1
Bhaga_1	3966601	3966700	0.5	0.5	0.5	0.5	0.5	0.5	1	1	0.5	0.5
Bhaga_1	3966701	3966800	0.5	0.5	0.5	1	0.5	0.5	1	1	0.5	0.5
Bhaga_1	3966801	3966900	0.5	0.5	0.5	1	0.5	0.5	1	1	0.5	0.5
Bhaga_1	3966901	3967000	0.5	0.5	0.5	1	0.5	0.5	1	0.5	0.5	0.5
Bhaga_1	3967601	3967700	1	1	0.5	1	1	0.5	1	1	1	1
Bhaga_1	3967901	3968000	1	0.5	1	1	1	0.5	1	0.5	1	0.5
Bhaga_1	3968001	3968100	0.5	0	0	0	0	0	0.5	0	0.5	0
Bhaga_1	3968901	3969000	0.5	1	0.5	1	0.5	1	0.5	1	1	1
Bhaga_1	3969001	3969100	0.5	0.5	0.5	1	0.5	1	1	1	1	1
Bhaga_1	3972101	3972200	0.5	0	0.5	0.5	0.5	0.5	0.5	0	0	0.5
Bhaga_1	3973401	3973500	0.5	0.5	0.5	1	1	1	1	1	0.5	0.5
Bhaga_1	3973501	3973600	0.5	0.5	0.5	1	1	1	1	1	0.5	0.5
Bhaga_1	3973601	3973700	0.5	1	1	1	1	1	1	1	0.5	0.5
Bhaga_1	4006901	4007000	1	0.5	1	1	1	1	1	1	1	0.5
Bhaga_1	4009701	4009800	1	1	1	0.5	1	1	0.5	1	1	0.5
Bhaga_1	4010001	4010100	1	1	0.5	0.5	1	1	1	1	1	0.5
Bhaga_1	4010101	4010200	1	1	1	0.5	1	1	1	1	1	0.5
Bhaga_1	4010201	4010300	0.5	0.5	1	0.5	1	1	1	1	0.5	0.5
Bhaga_1	4010301	4010400	1	0.5	1	0.5	1	1	1	1	1	0.5
Bhaga_1	4010601	4010700	1	0.5	1	1	1	1	1	1	0.5	0.5
Bhaga_1	4011801	4011900	0.5	0.5	0	0.5	0	0.5	0	0	0	0.5
Bhaga_1	4014101	4014200	1	1	1	1	1	0.5	0.5	1	0.5	1
Bhaga_1	4014201	4014300	0.5	0.5	1	0.5	0.5	0.5	0.5	1	0.5	0.5
Bhaga_1	4014901	4015000	1	1	0.5	1	0.5	0.5	1	1	1	1
Bhaga_1	4017701	4017800	1	1	1	0.5	1	1	1	1	0.5	1
Bhaga_1	4018501	4018600	1	1	0.5	1	1	0.5	1	1	0.5	1
Bhaga_1	4018901	4019000	0.5	0.5	0.5	1	0.5	0.5	0.5	1	1	0.5
Bhaga_1	4022101	4022200	1	1	1	1	0.5	0.5	1	0.5	1	1
Bhaga_1	4024701	4024800	0.5	0.5	1	1	1	1	1	1	0.5	0.5
Bhaga_1	4028201	4028300	1	0.5	0.5	0.5	0.5	1	0.5	1	0.5	0.5
Bhaga_1	4035501	4035600	0.5	1	0.5	0.5	0.5	0.5	0.5	1	1	1
Bhaga_1	4043701	4043800	1	1	1	1	1	0.5	1	1	0.5	0.5
Bhaga_1	4048501	4048600	0.5	1	1	1	1	1	1	1	1	0.5
Bhaga_1	4049401	4049500	1	0.5	1	1	0.5	1	1	0.5	1	1
Bhaga_1	4049901	4050000	1	0.5	1	1	1	0.5	1	0.5	1	1
Bhaga_1	4050401	4050500	0.5	1	0.5	0.5	1	1	1	1	0.5	1
Bhaga_1	4050501	4050600	1	1	1	1	0.5	0.5	1	0.5	1	1
Bhaga_1	4057101	4057200	1	1	1	0.5	1	0.5	1	1	0.5	1
Bhaga_1	4057201	4057300	1	1	1	1	1	0.5	1	1	0.5	1
Bhaga_1	4057301	4057400	1	1	1	1	0.5	0.5	0.5	1	0.5	0.5
Bhaga_1	4057401	4057500	1	1	1	1	0.5	0.5	0.5	0.5	0.5	0.5
Bhaga_1	4060101	4060200	1	1	0.5	0.5	0.5	0.5	0.5	0.5	0.5	1
Bhaga_1	4068001	4068100	0.5	0.5	0.5	1	0.5	1	0.5	1	0.5	0.5
Bhaga_1	4075101	4075200	0.5	1	1	0.5	0.5	1	1	1	1	1
Bhaga_1	4084201	4084300	0.5	0.5	0.5	0.5	0.5	0.5	0	0.5	0.5	0.5
Bhaga_1	4085801	4085900	1	0.5	1	0.5	0.5	0.5	1	0.5	0.5	1
Bhaga_1	4085901	4086000	1	0.5	1	0.5	0.5	1	1	0.5	1	0.5
Bhaga_1	4088401	4088500	0	0	0	0.5	0.5	0	0.5	0	0	0.5
Bhaga_1	4092601	4092700	0.5	0.5	0.5	1	1	1	1	1	1	1
Bhaga_1	4096301	4096400	0.5	1	1	1	0.5	1	1	0.5	0.5	1
Bhaga_1	4110601	4110700	0.5	0.5	0.5	0.5	0.5	0.5	1	0.5	1	1
Bhaga_1	4110701	4110800	0.5	0.5	0.5	0.5	0.5	0.5	1	0.5	1	1
Bhaga_1	4115601	4115700	0	0	0	0.5	0.5	0	0	0	0	0.5
Bhaga_1	4116501	4116600	1	1	1	1	1	1	0.5	0.5	0.5	1
Bhaga_1	4116701	4116800	1	1	0.5	1	1	1	0.5	1	1	0.5
Bhaga_1	4122001	4122100	1	0.5	1	0.5	1	0.5	0.5	1	1	1
Bhaga_1	4122101	4122200	1	1	1	0.5	1	0.5	1	1	1	1
Bhaga_1	4126201	4126300	1	0.5	0.5	0.5	1	1	1	1	1	1
Bhaga_1	4129801	4129900	0.5	1	1	1	1	0.5	0.5	1	1	0.5
Bhaga_1	4129901	4130000	0.5	0.5	1	0.5	1	0.5	0.5	1	1	1
Bhaga_1	4130401	4130500	0.5	0.5	0.5	1	0.5	0.5	0.5	0.5	1	0.5
Bhaga_1	4131201	4131300	1	0.5	1	1	1	0.5	1	1	1	1
Bhaga_1	4132301	4132400	0.5	1	0.5	1	0.5	1	0.5	1	1	0.5
Bhaga_1	4132701	4132800	1	0.5	1	0.5	1	0.5	1	1	1	1
Bhaga_1	4133601	4133700	0.5	0.5	1	0.5	1	0.5	0.5	0.5	1	1
Bhaga_1	4133901	4134000	1	0.5	0.5	1	1	0.5	1	0.5	1	1
Bhaga_1	4134001	4134100	1	0.5	1	1	1	1	1	0.5	1	1
Bhaga_1	4134101	4134200	0.5	1	1	0.5	0.5	1	0.5	0.5	0.5	0.5
Bhaga_1	4134201	4134300	0.5	0.5	0.5	0.5	1	1	0.5	0.5	0.5	1
Bhaga_1	4137301	4137400	0.5	0.5	1	0.5	0.5	0.5	0.5	0.5	1	1
Bhaga_1	4138501	4138600	0	0	0	0	0	0.5	0	0.5	0	0
Bhaga_1	4141501	4141600	0.5	0.5	0.5	1	1	1	1	0.5	0.5	1
Bhaga_1	4141601	4141700	0.5	1	0.5	1	0.5	1	1	0.5	0.5	1
Bhaga_1	4150401	4150500	0.5	0.5	0	0.5	0.5	0	0	0.5	0.5	0.5
Bhaga_1	4150501	4150600	0	0.5	0	0	0	0	0	0	0.5	0
Bhaga_1	4150601	4150700	0	0.5	0	0	0	0	0	0	0.5	0
Bhaga_1	4152701	4152800	1	0.5	0.5	0.5	0.5	0.5	1	1	1	1
Bhaga_1	4154601	4154700	1	0.5	1	0.5	1	1	0.5	1	1	0.5
Bhaga_1	4158001	4158100	0.5	0.5	1	1	1	0.5	1	1	1	1
Bhaga_1	4158901	4159000	0.5	1	1	1	0.5	0.5	1	1	1	1
Bhaga_1	4168401	4168500	0.5	0.5	1	1	0.5	1	1	1	0.5	1
Bhaga_1	4168701	4168800	1	0.5	1	1	1	1	1	1	1	1
Bhaga_1	4171101	4171200	1	0.5	1	1	0.5	0.5	1	1	1	0.5
Bhaga_1	4173001	4173100	1	1	1	1	1	1	0.5	1	0.5	0.5
Bhaga_1	4173501	4173600	1	1	0.5	0.5	1	0.5	0.5	1	0.5	1
Bhaga_1	4174001	4174100	0.5	1	1	0.5	1	1	0.5	1	1	1
Bhaga_1	4175301	4175400	1	1	0.5	0.5	0.5	0.5	0.5	1	0.5	0.5
Bhaga_1	4175401	4175500	1	1	1	0.5	1	1	0.5	1	0.5	1
Bhaga_1	4175501	4175600	1	0.5	1	0.5	1	1	0.5	1	0.5	1
Bhaga_1	4175601	4175700	1	0.5	1	1	1	1	0.5	1	1	1
Bhaga_1	4175701	4175800	1	0.5	1	1	0.5	1	0.5	0.5	1	0.5
Bhaga_1	4175801	4175900	1	0.5	1	1	0.5	1	1	0.5	1	0.5
Bhaga_1	4176701	4176800	0.5	0.5	0.5	1	0.5	0.5	1	0.5	0.5	0.5
Bhaga_1	4191901	4192000	1	1	1	1	1	0.5	0.5	1	1	1
Bhaga_1	4193501	4193600	0.5	0.5	0.5	1	0.5	0.5	0.5	0.5	1	0.5
Bhaga_1	4196301	4196400	0.5	0.5	1	0.5	1	1	0.5	0.5	0.5	1
Bhaga_1	4199601	4199700	1	1	0.5	1	1	1	1	1	1	1
Bhaga_1	4202701	4202800	0.5	1	1	1	0.5	1	1	1	0.5	1
Bhaga_1	4204601	4204700	1	0.5	0.5	0.5	0.5	0.5	1	1	1	1
Bhaga_1	4207001	4207100	0.5	0.5	1	0.5	1	1	1	0.5	0.5	0.5
Bhaga_1	4207101	4207200	0.5	1	1	1	1	1	1	0.5	1	0.5
Bhaga_1	4212401	4212500	1	0.5	1	1	1	1	1	1	0.5	0.5
Bhaga_1	4222301	4222400	0	0	0.5	0.5	0	0.5	0	0	0.5	0.5
Bhaga_1	4222401	4222500	0	0	0.5	0.5	0	0.5	0	0	0.5	0.5
Bhaga_1	4222501	4222600	0	0.5	0	0.5	0.5	0.5	0.5	0	0.5	0.5
Bhaga_1	4224001	4224100	0.5	1	0.5	1	0.5	0.5	0.5	0.5	0.5	0.5
Bhaga_1	4230501	4230600	0.5	0	0.5	0	0	0.5	0.5	0.5	0.5	0
Bhaga_1	4230601	4230700	0	0	0.5	0	0	0.5	0.5	0.5	0.5	0
Bhaga_1	4230701	4230800	0	0	0.5	0.5	0	0.5	0.5	0.5	0.5	0
Bhaga_1	4231801	4231900	1	1	0.5	0.5	0.5	1	1	1	1	1
Bhaga_1	4237501	4237600	1	0.5	1	1	1	1	0.5	1	1	1
Bhaga_1	4252001	4252100	0.5	1	1	1	1	1	1	0.5	0.5	0.5
Bhaga_1	4254801	4254900	0.5	0.5	0.5	0.5	0.5	1	1	1	0.5	1
Bhaga_1	4256701	4256800	0.5	0	0	0.5	0.5	0.5	0.5	0	0.5	0.5
Bhaga_1	4257001	4257100	0	0	0	0	0	0.5	0	0	0.5	0.5
Bhaga_1	4257401	4257500	0.5	1	0.5	1	0.5	1	0.5	1	1	0.5
Bhaga_1	4257701	4257800	1	1	1	1	0.5	1	1	1	1	0.5
Bhaga_1	4258101	4258200	0.5	1	1	1	1	1	1	1	0.5	0.5
Bhaga_1	4258201	4258300	0.5	0.5	1	1	0.5	1	1	1	0.5	0.5
Bhaga_1	4277701	4277800	0.5	1	1	0.5	0.5	0.5	0.5	0.5	0.5	1
Bhaga_1	4277801	4277900	0.5	1	0.5	0.5	0.5	0.5	0.5	0.5	1	1
Bhaga_1	4278001	4278100	0.5	1	1	0.5	0.5	0.5	0.5	0.5	0.5	1
Bhaga_1	4285901	4286000	0.5	0.5	0.5	0.5	0.5	0.5	1	1	0.5	0.5
Bhaga_1	4286801	4286900	0.5	0.5	0.5	1	1	0.5	1	1	0.5	1
Bhaga_1	4286901	4287000	0.5	1	0.5	1	1	1	1	1	0.5	1
Bhaga_1	4287701	4287800	1	0.5	0.5	1	0.5	0.5	1	0.5	0.5	0.5
Bhaga_1	4298601	4298700	0.5	0.5	0.5	1	0.5	0.5	0.5	1	0.5	0.5
Bhaga_1	4306901	4307000	0.5	0	0	0.5	0	0	0	0	0.5	0
Bhaga_1	4307901	4308000	1	1	0.5	0.5	0.5	0.5	1	1	1	1
Bhaga_1	4315201	4315300	0	0	0	0.5	0	0	0	0	0	0.5
Bhaga_1	4321901	4322000	1	1	0.5	1	1	1	0.5	0.5	0.5	0.5
Bhaga_1	4322001	4322100	1	1	1	1	1	1	0.5	0.5	0.5	0.5
Bhaga_1	4322101	4322200	1	1	1	0.5	1	1	0.5	0.5	0.5	0.5
Bhaga_1	4334501	4334600	1	1	1	1	0.5	0.5	0.5	1	1	1
Bhaga_1	4334601	4334700	0.5	1	1	1	0.5	0.5	0.5	1	1	1
Bhaga_1	4334701	4334800	0.5	1	0.5	1	0.5	0.5	1	0.5	1	1
Bhaga_1	4339101	4339200	0	0.5	0	0.5	0.5	0	0.5	0	0.5	0.5
Bhaga_1	4339201	4339300	0	0.5	0	0.5	0.5	0	0.5	0	0.5	0.5
Bhaga_1	4339401	4339500	0.5	1	0.5	0.5	0.5	0.5	1	1	1	1
Bhaga_1	4344101	4344200	0	0.5	0	0	0	0	0	0.5	0	0
Bhaga_1	4348101	4348200	0.5	0.5	0.5	0.5	0	0.5	0.5	0	0	0
Bhaga_1	4348201	4348300	0.5	0.5	0.5	0.5	0	0.5	0.5	0.5	0	0.5
Bhaga_1	4348301	4348400	0.5	0.5	0.5	0	0	0.5	0.5	0.5	0	0.5
Bhaga_1	4348501	4348600	0.5	0.5	0.5	0	0	0	0.5	0.5	0	0.5
Bhaga_1	4348601	4348700	0.5	0.5	0.5	0	0	0	0.5	0.5	0.5	0.5
Bhaga_1	4348701	4348800	0.5	0.5	0.5	0	0	0.5	0.5	0.5	0.5	0.5
Bhaga_1	4355901	4356000	0.5	0	0	0.5	0	0.5	0	0	0.5	0.5
Bhaga_1	4366901	4367000	0.5	0.5	1	0.5	1	0.5	1	0.5	1	0.5
Bhaga_1	4367901	4368000	0.5	0.5	0.5	0	0.5	0	0	0.5	0.5	0
Bhaga_1	4368001	4368100	0	0.5	0.5	0.5	0.5	0.5	0	0.5	0.5	0
Bhaga_1	4370801	4370900	0.5	0.5	1	1	0.5	1	1	1	1	0.5
Bhaga_1	4370901	4371000	1	0.5	1	1	0.5	1	1	1	1	0.5
Bhaga_1	4371101	4371200	0.5	1	1	1	1	1	1	1	0.5	1
Bhaga_1	4371401	4371500	0.5	1	1	1	1	1	1	1	0.5	1
Bhaga_1	4371501	4371600	0.5	0.5	1	1	1	1	0.5	1	0.5	1
Bhaga_1	4371901	4372000	0.5	0.5	1	1	0.5	1	1	1	1	1
Bhaga_1	4377601	4377700	1	1	0.5	1	1	0.5	1	1	0.5	1
Bhaga_1	4379001	4379100	0	0	0.5	0	0.5	0.5	0	0	0	0
Bhaga_1	4380601	4380700	1	0.5	0.5	0.5	0.5	0.5	1	0.5	0.5	1
Bhaga_1	4381201	4381300	0	0	0	0	0	0	0	0	0.5	0
Bhaga_1	4385901	4386000	0	0	0.5	0.5	0.5	0	0.5	0.5	0	0
Bhaga_1	4387101	4387200	0.5	0	0	0	0	0	0	0	0.5	0
Bhaga_1	4391601	4391700	1	0.5	1	1	0.5	1	1	1	1	1
Bhaga_1	4394301	4394400	0	0.5	0	0.5	0	0	0.5	0.5	0	0
Bhaga_1	4396801	4396900	1	1	1	1	0.5	1	1	1	0.5	1
Bhaga_1	4407401	4407500	0.5	0.5	0.5	1	0.5	0.5	0.5	0.5	1	0.5
Bhaga_1	4410301	4410400	0.5	0.5	0.5	0.5	1	0.5	0.5	0.5	0.5	1
Bhaga_1	4410501	4410600	0.5	1	0.5	1	1	0.5	1	1	0.5	0.5
Bhaga_1	4410601	4410700	0.5	0.5	0.5	0.5	0	0	0.5	0.5	0.5	0.5
Bhaga_1	4411401	4411500	0.5	0	0.5	0	0.5	0	0	0	0	0
Bhaga_1	4414501	4414600	0.5	0.5	0	0.5	0.5	0.5	0.5	0	0.5	0
Bhaga_1	4420401	4420500	0.5	0.5	1	0.5	0.5	1	1	1	1	1
Bhaga_1	4420801	4420900	0.5	1	1	1	1	0.5	1	1	0.5	1
Bhaga_1	4421101	4421200	0.5	1	1	1	1	0.5	1	1	0.5	1
Bhaga_1	4421201	4421300	0.5	0.5	1	1	0.5	0.5	1	0.5	0.5	0.5
Bhaga_1	4421301	4421400	0.5	1	1	0.5	0.5	0.5	1	0.5	0.5	0.5
Bhaga_1	4425001	4425100	1	0.5	1	1	1	0.5	1	1	0.5	0.5
Bhaga_1	4426201	4426300	0.5	0.5	1	1	1	1	1	0.5	1	1
Bhaga_1	4427201	4427300	1	0.5	0.5	1	1	1	0.5	1	1	1
Bhaga_1	4427301	4427400	1	1	0.5	0.5	0.5	1	1	1	1	0.5
Bhaga_1	4429301	4429400	0.5	0	0.5	0.5	0.5	0	0	0	0.5	0
Bhaga_1	4429601	4429700	1	0.5	1	0.5	1	1	1	1	1	0.5
Bhaga_1	4429801	4429900	1	1	1	0.5	1	1	1	1	0.5	1
Bhaga_1	4440901	4441000	1	0.5	1	1	1	1	0.5	0.5	1	1
Bhaga_1	4447501	4447600	0.5	1	1	1	0.5	1	1	1	1	1
Bhaga_1	4458901	4459000	1	1	1	1	1	1	1	0.5	0.5	0.5
Bhaga_1	4469801	4469900	0.5	0.5	0.5	0.5	0.5	0.5	0.5	0	0	0.5
Bhaga_1	4475001	4475100	0	0.5	0.5	0	0	0	0	0	0.5	0
Bhaga_1	4487901	4488000	1	1	0.5	0.5	1	1	1	0.5	1	0.5
Bhaga_1	4494101	4494200	0.5	0	0	0.5	0.5	0.5	0	0.5	0	0
Bhaga_1	4506101	4506200	0.5	0.5	0	0	0.5	0	0	0.5	0.5	0.5
Bhaga_1	4509201	4509300	0.5	1	0.5	1	1	1	1	1	0.5	1
Bhaga_1	4509901	4510000	0.5	0.5	0	0.5	0.5	0.5	0.5	0	0	0.5
Bhaga_1	4514401	4514500	1	0.5	0.5	0.5	0.5	0.5	0.5	0.5	1	0.5
Bhaga_1	4515201	4515300	0.5	0.5	0.5	1	1	0.5	1	0.5	0.5	0.5
Bhaga_1	4523401	4523500	1	1	1	1	1	1	1	0.5	1	0.5
Bhaga_1	4525601	4525700	1	1	1	1	1	0.5	0.5	1	1	0.5
Bhaga_1	4530501	4530600	0.5	1	1	1	0.5	1	1	0.5	0.5	1
Bhaga_1	4532201	4532300	0.5	0.5	0.5	0	0.5	0.5	0.5	0.5	0.5	0.5
Bhaga_1	4532301	4532400	0.5	0.5	0.5	0	0.5	0.5	0.5	0.5	0.5	0.5
Bhaga_1	4532401	4532500	0.5	0.5	0	0	0	0.5	0.5	0	0	0.5
Bhaga_1	4532501	4532600	0.5	0.5	0	0	0	0.5	0.5	0	0	0.5
Bhaga_1	4534101	4534200	0	0	0	0	0	0.5	0.5	0	0.5	0.5
Bhaga_1	4536701	4536800	1	0.5	0.5	0.5	1	1	1	1	0.5	1
Bhaga_1	4539101	4539200	0.5	0.5	0.5	0.5	0.5	1	0.5	0.5	0.5	0.5
Bhaga_1	4539201	4539300	0.5	1	1	0.5	0.5	1	1	0.5	1	0.5
Bhaga_1	4542501	4542600	0.5	1	1	0.5	1	1	1	1	0.5	0.5
Bhaga_1	4543501	4543600	0	0.5	0.5	0	0.5	0.5	0	0	0.5	0
Bhaga_1	4546901	4547000	0	0.5	0	0.5	0.5	0	0.5	0.5	0.5	0.5
Bhaga_1	4547201	4547300	0	0	0	0.5	0.5	0	0	0.5	0	0
Bhaga_1	4548001	4548100	0	0	0	0	0.5	0.5	0	0.5	0	0
Bhaga_1	4548201	4548300	0.5	0.5	1	1	1	0.5	0.5	0.5	0.5	0.5
Bhaga_1	4548301	4548400	0.5	0.5	1	1	1	0.5	0.5	0.5	0.5	0.5
Bhaga_1	4548701	4548800	0	0	0.5	0.5	0	0	0	0	0	0
Bhaga_1	4548801	4548900	0	0	0.5	0.5	0	0	0	0	0.5	0
Bhaga_1	4550001	4550100	0	0	0	0	0	0.5	0	0	0.5	0.5
Bhaga_1	4552401	4552500	0.5	0.5	1	1	0.5	0.5	0.5	0.5	0.5	1
Bhaga_1	4552901	4553000	0.5	0.5	0.5	1	1	0.5	1	1	0.5	1
Bhaga_1	4554901	4555000	0.5	0.5	0	0	0.5	0	0	0.5	0	0
Bhaga_1	4555001	4555100	0.5	0.5	0	0	0.5	0	0	0.5	0	0
Bhaga_1	4559501	4559600	1	0.5	1	1	1	1	0.5	1	1	0.5
Bhaga_1	4559701	4559800	0	0.5	0	0	0	0	0	0.5	0	0
Bhaga_1	4569301	4569400	0.5	1	1	1	1	1	0.5	0.5	0.5	1
Bhaga_1	4569501	4569600	0	0	0.5	0	0	0.5	0.5	0	0.5	0
Bhaga_1	4572201	4572300	1	1	1	0.5	1	0.5	0.5	1	1	1
Bhaga_1	4573101	4573200	1	1	1	1	0.5	1	0.5	0.5	1	1
Bhaga_1	4573701	4573800	1	1	1	1	0.5	1	1	0.5	1	1
Bhaga_1	4577701	4577800	1	0.5	1	1	1	0.5	1	1	1	1
Bhaga_1	4597901	4598000	1	0.5	0.5	0.5	1	1	1	0.5	0.5	0.5
Bhaga_1	4622401	4622500	0.5	0.5	1	1	1	1	1	1	1	1
Bhaga_1	4624501	4624600	1	1	1	0.5	1	1	1	0.5	0.5	1
Bhaga_1	4624601	4624700	1	1	1	0.5	1	1	1	0.5	0.5	1
Bhaga_1	4636501	4636600	0.5	0.5	0.5	0.5	1	1	1	0.5	1	1
Bhaga_1	4636601	4636700	0.5	0.5	1	0.5	1	1	0.5	0.5	1	1
Bhaga_1	4637301	4637400	0.5	0.5	0.5	1	0.5	1	1	1	1	1
Bhaga_1	4637401	4637500	0.5	0.5	0.5	1	0.5	1	1	1	0.5	1
Bhaga_1	4639001	4639100	0	0	0.5	0	0	0	0.5	0	0	0.5
Bhaga_1	4639101	4639200	0	0	0.5	0	0	0	0.5	0	0	0.5
Bhaga_1	4650201	4650300	0	0	0	0.5	0	0.5	0	0	0	0
Bhaga_1	4656401	4656500	0.5	0.5	0.5	0.5	0.5	1	0.5	0.5	0.5	1
Bhaga_1	4657601	4657700	1	1	1	0.5	0.5	1	1	0.5	1	1
Bhaga_1	4659401	4659500	0.5	1	0.5	0.5	1	1	1	1	0.5	1
Bhaga_1	4662901	4663000	0.5	0.5	1	0.5	0.5	0.5	1	0.5	0.5	1
Bhaga_1	4664001	4664100	0.5	0	0.5	0	0.5	0.5	0	0.5	0.5	0
Bhaga_1	4665101	4665200	0.5	0.5	1	0.5	0.5	1	0.5	1	0.5	0.5
Bhaga_1	4671701	4671800	1	0.5	0.5	1	0.5	0.5	1	1	0.5	0.5
Bhaga_1	4671801	4671900	1	0.5	0.5	1	1	0.5	1	1	0.5	1
Bhaga_1	4676001	4676100	0.5	0.5	1	0.5	1	0.5	1	1	0.5	0.5
Bhaga_1	4680201	4680300	1	1	1	1	1	0.5	0.5	1	1	1
Bhaga_1	4680301	4680400	1	1	1	1	1	0.5	0.5	1	1	1
Bhaga_1	4681201	4681300	0.5	0	0	0	0.5	0	0	0.5	0	0
Bhaga_1	4681801	4681900	0.5	1	0.5	0.5	1	1	0.5	0.5	1	1
Bhaga_1	4682101	4682200	1	0.5	1	1	0.5	1	0.5	0.5	1	0.5
Bhaga_1	4686301	4686400	0.5	0.5	0	0	0.5	0.5	0.5	0.5	0.5	0.5
Bhaga_1	4686401	4686500	0.5	0.5	0	0	0.5	0.5	0.5	0.5	0.5	0.5
Bhaga_1	4686601	4686700	0.5	0.5	0	0	0.5	0.5	0.5	0.5	0.5	0.5
Bhaga_1	4688501	4688600	0.5	0.5	1	1	0.5	1	1	1	0.5	0.5
Bhaga_1	4694201	4694300	1	0.5	1	0.5	1	0.5	0.5	1	0.5	0.5
Bhaga_1	4699801	4699900	0	0	0.5	0.5	0	0.5	0.5	0.5	0.5	0.5
Bhaga_1	4700601	4700700	0.5	0.5	0.5	0.5	0.5	0.5	0.5	0	0.5	0
Bhaga_1	4707401	4707500	0.5	0.5	0.5	0.5	0	0.5	0.5	0.5	0.5	0.5
Bhaga_1	4707501	4707600	0.5	0	0.5	0	0	0	0	0	0.5	0
Bhaga_1	4708101	4708200	1	0.5	1	1	1	0.5	0.5	1	0.5	1
Bhaga_1	4708201	4708300	1	0.5	0.5	1	1	0.5	0.5	1	0.5	1
Bhaga_1	4711501	4711600	1	1	1	1	1	0.5	1	1	1	0.5
Bhaga_1	4711601	4711700	1	1	0.5	1	0.5	0.5	0.5	1	0.5	0.5
Bhaga_1	4713001	4713100	1	1	1	0.5	0.5	1	0.5	1	1	0.5
Bhaga_1	4713601	4713700	0.5	0	0	0.5	0.5	0	0.5	0	0.5	0
Bhaga_1	4713701	4713800	0.5	0.5	0.5	0.5	0.5	0.5	0.5	0	0.5	0
Bhaga_1	4715201	4715300	0.5	0.5	1	1	1	0.5	0.5	1	1	1
Bhaga_1	4715301	4715400	0.5	0.5	1	1	0.5	0.5	0.5	1	1	0.5
Bhaga_1	4717001	4717100	0.5	0.5	1	1	1	1	1	0.5	0.5	0.5
Bhaga_1	4718901	4719000	0	0	0.5	0	0	0.5	0.5	0	0.5	0
Bhaga_1	4730201	4730300	0.5	0.5	1	0.5	1	1	1	1	0.5	1
Bhaga_1	4730301	4730400	0.5	0.5	1	0.5	1	1	1	1	0.5	1
Bhaga_1	4730401	4730500	0.5	0.5	1	0.5	1	1	1	1	0.5	1
Bhaga_1	4735501	4735600	0.5	1	0.5	1	1	0.5	1	1	1	1
Bhaga_1	4735701	4735800	0.5	1	0.5	1	0.5	1	1	1	1	0.5
Bhaga_1	4738101	4738200	0	0.5	0	0	0	0	0	0.5	0	0.5
Bhaga_1	4743101	4743200	1	1	1	1	1	1	1	0.5	0.5	1
Bhaga_1	4743201	4743300	0.5	1	1	0.5	1	1	0.5	0.5	0.5	1
Bhaga_1	4743601	4743700	0.5	1	0.5	1	1	1	1	1	1	1
Bhaga_1	4743701	4743800	0.5	1	1	1	1	0.5	1	1	1	1
Bhaga_1	4750601	4750700	0.5	0.5	1	0.5	1	1	0.5	1	0.5	0.5
Bhaga_1	4752101	4752200	0	0	0	0	0.5	0.5	0	0	0.5	0
Bhaga_1	4756001	4756100	0.5	0	0	0	0.5	0.5	0.5	0.5	0	0
Bhaga_1	4758901	4759000	0.5	0.5	0.5	1	1	0.5	1	1	0.5	0.5
Bhaga_1	4761901	4762000	1	1	1	1	0.5	1	1	0.5	0.5	1
Bhaga_1	4762401	4762500	0.5	1	1	0.5	1	1	1	1	1	1
Bhaga_1	4769401	4769500	0.5	1	0.5	0.5	0.5	1	0.5	1	1	0.5
Bhaga_1	4769501	4769600	0.5	1	0.5	0.5	0.5	1	0.5	1	1	0.5
Bhaga_1	4771201	4771300	0.5	0.5	0	0	0	0	0	0	0.5	0
Bhaga_1	4772101	4772200	0.5	1	0.5	1	0.5	1	1	1	0.5	0.5
Bhaga_1	4773301	4773400	1	0.5	0.5	0.5	0.5	1	0.5	1	0.5	0.5
Bhaga_1	4773701	4773800	0.5	0.5	0	0	0.5	0	0.5	0.5	0	0.5
Bhaga_1	4773801	4773900	0.5	0.5	0	0	0.5	0	0.5	0.5	0	0.5
Bhaga_1	4774001	4774100	0.5	0.5	0	0	0.5	0	0.5	0.5	0	0.5
Bhaga_1	4780201	4780300	0	0.5	0.5	0	0.5	0	0.5	0.5	0	0
Bhaga_1	4780901	4781000	0.5	1	1	1	0.5	1	1	1	0.5	1
Bhaga_1	4781301	4781400	0.5	1	1	1	0.5	0.5	1	1	0.5	1
Bhaga_1	4781501	4781600	0.5	0.5	0	0	0.5	0.5	0.5	0.5	0.5	0.5
Bhaga_1	4784501	4784600	0.5	1	1	0.5	1	1	1	1	1	0.5
Bhaga_1	4784601	4784700	0.5	0.5	1	0.5	1	0.5	1	0.5	1	1
Bhaga_1	4795901	4796000	0.5	0	0	0	0	0	0.5	0	0	0.5
Bhaga_1	4796501	4796600	1	1	1	1	1	1	1	0.5	1	1
Bhaga_1	4804501	4804600	0	0	0.5	0.5	0	0.5	0	0	0	0
Bhaga_1	4804601	4804700	0	0	0.5	0.5	0	0.5	0	0	0	0
Bhaga_1	4804701	4804800	0	0	0.5	0.5	0	0.5	0	0	0	0
Bhaga_1	4816101	4816200	0.5	1	1	1	0.5	0.5	1	0.5	0.5	0.5
Bhaga_1	4819301	4819400	0.5	0.5	0.5	0.5	0	0.5	0	0.5	0	0.5
Bhaga_1	4820801	4820900	0.5	0.5	0.5	0.5	0.5	1	1	0.5	1	1
Bhaga_1	4822101	4822200	0.5	0.5	0	0.5	0.5	0.5	0	0	0.5	0.5
Bhaga_1	4824501	4824600	1	1	1	0.5	1	1	1	1	1	0.5
Bhaga_1	4824601	4824700	1	1	1	0.5	1	1	1	1	1	0.5
Bhaga_1	4825201	4825300	0.5	0.5	0.5	1	1	0.5	0.5	0.5	1	1
Bhaga_1	4826501	4826600	1	1	0.5	1	0.5	1	1	1	1	0.5
Bhaga_1	4826701	4826800	0.5	1	1	1	1	0.5	1	0.5	1	1
Bhaga_1	4827701	4827800	0.5	1	1	0.5	0.5	0.5	0.5	0.5	0.5	0.5
Bhaga_1	4830801	4830900	0.5	1	1	1	1	0.5	1	0.5	1	1
Bhaga_1	4831801	4831900	0.5	0.5	0	0.5	0.5	0.5	0	0.5	0	0.5
Bhaga_1	4832801	4832900	0.5	1	0.5	0.5	1	1	1	0.5	0.5	1
Bhaga_1	4838201	4838300	0.5	0.5	1	1	0.5	1	0.5	1	1	1
Bhaga_1	4838301	4838400	0.5	1	1	1	0.5	1	1	0.5	1	0.5
Bhaga_1	4838401	4838500	0.5	1	1	1	0.5	1	1	0.5	1	0.5
Bhaga_1	4838601	4838700	1	1	0.5	0.5	1	1	0.5	1	0.5	1
Bhaga_1	4847401	4847500	0	0.5	0	0	0	0	0.5	0	0	0
Bhaga_1	4854601	4854700	0.5	1	0.5	0.5	1	1	1	1	1	1
Bhaga_1	4855601	4855700	1	1	1	0.5	1	0.5	1	1	1	1
Bhaga_1	4855701	4855800	1	1	1	0.5	1	0.5	1	1	1	1
Bhaga_1	4859201	4859300	1	1	1	1	1	1	0.5	0.5	1	0.5
Bhaga_1	4859301	4859400	1	1	0.5	1	1	1	0.5	1	1	0.5
Bhaga_1	4859401	4859500	1	1	1	1	1	1	0.5	1	1	0.5
Bhaga_1	4865701	4865800	0.5	0.5	1	0.5	0.5	1	0.5	1	0.5	0.5
Bhaga_1	4895801	4895900	0	0	0	0	0	0	0.5	0	0.5	0
Bhaga_1	4907301	4907400	0	0	0.5	0.5	0.5	0	0	0	0.5	0
Bhaga_1	4907401	4907500	0.5	0.5	0.5	0.5	0.5	0.5	0.5	1	0.5	1
Bhaga_1	4910301	4910400	0.5	1	1	1	0.5	1	1	0.5	0.5	1
Bhaga_1	4910401	4910500	1	1	1	1	0.5	1	1	0.5	0.5	1
Bhaga_1	4912101	4912200	1	0.5	1	1	0.5	1	0.5	1	1	1
Bhaga_1	4918701	4918800	1	1	1	1	0.5	1	1	1	0.5	0.5
Bhaga_1	4918901	4919000	0.5	0.5	1	1	1	1	1	1	1	1
Bhaga_1	4925501	4925600	0.5	0.5	1	1	1	1	1	1	0.5	1
Bhaga_1	4935401	4935500	1	1	0.5	1	1	1	1	0.5	0.5	0.5
Bhaga_1	4939501	4939600	0.5	1	1	1	1	1	1	0.5	1	1
Bhaga_1	4940901	4941000	1	1	0.5	1	1	0.5	0.5	1	1	1
Bhaga_1	4942701	4942800	0	0	0.5	0	0.5	0.5	0.5	0.5	0.5	0.5
Bhaga_1	4945701	4945800	0	0.5	0.5	0.5	0.5	0.5	0	0.5	0.5	0
Bhaga_1	4947501	4947600	1	0.5	0.5	1	0.5	0.5	0.5	1	0.5	0.5
Bhaga_1	4953001	4953100	0	0	0	0.5	0	0.5	0	0	0	0
Bhaga_1	4954801	4954900	1	1	0.5	1	0.5	1	1	0.5	1	1
Bhaga_1	4964201	4964300	1	0.5	1	1	0.5	0.5	1	1	1	1
Bhaga_1	4964301	4964400	1	0.5	1	1	0.5	0.5	1	1	1	1
Bhaga_1	4965001	4965100	0.5	0.5	0.5	0.5	1	1	0.5	1	0.5	0.5
Bhaga_1	4971001	4971100	1	1	1	1	0.5	1	1	0.5	1	1
Bhaga_1	4971101	4971200	1	1	1	0.5	0.5	1	1	0.5	1	1
Bhaga_1	4973901	4974000	0.5	1	1	1	1	0.5	0.5	1	1	0.5
Bhaga_1	4974501	4974600	0.5	0.5	1	1	0.5	0.5	1	1	0.5	0.5
Bhaga_1	4974701	4974800	1	0.5	1	1	1	0.5	1	0.5	1	1
Bhaga_1	4975101	4975200	0.5	0.5	1	0.5	0.5	0.5	1	0.5	1	1
Bhaga_1	4975401	4975500	1	0.5	1	1	1	0.5	1	1	1	1
Bhaga_1	4979101	4979200	1	1	0.5	1	1	0.5	0.5	1	0.5	1
Bhaga_1	4989701	4989800	1	1	0.5	0.5	0.5	0.5	0.5	0.5	1	0.5
Bhaga_1	4992701	4992800	1	0.5	1	0.5	1	0.5	0.5	0.5	1	0.5
Bhaga_1	4992801	4992900	1	1	1	1	1	0.5	0.5	0.5	1	1
Bhaga_1	5006101	5006200	1	1	1	1	0.5	1	0.5	1	1	1
Bhaga_1	5007501	5007600	1	1	1	0.5	1	1	0.5	0.5	1	1
Bhaga_1	5008901	5009000	1	1	1	0.5	1	0.5	0.5	1	1	1
Bhaga_1	5009901	5010000	1	1	0.5	0.5	0.5	0.5	0.5	1	0.5	1
Bhaga_1	5010001	5010100	1	1	1	0.5	1	0.5	1	1	0.5	1
Bhaga_1	5016601	5016700	0	0.5	0.5	0	0.5	0.5	0	0.5	0	0.5
Bhaga_1	5016701	5016800	0	0.5	0.5	0	0.5	0.5	0	0.5	0	0.5
Bhaga_1	5016801	5016900	0	0.5	0.5	0	0.5	0.5	0.5	0.5	0.5	0.5
Bhaga_1	5016901	5017000	0	0.5	0.5	0.5	0.5	0.5	0.5	0.5	0.5	0.5
Bhaga_1	5017801	5017900	0.5	0.5	0.5	0.5	0.5	0.5	0.5	0	0.5	0
Bhaga_1	5020001	5020100	0	0	0	0	0	0.5	0	0	0	0.5
Bhaga_1	5020201	5020300	0	0.5	0.5	0	0	0.5	0	0	0	0
Bhaga_1	5020301	5020400	0	0.5	0	0	0	0	0.5	0	0	0
Bhaga_1	5022701	5022800	1	0.5	1	1	0.5	1	0.5	1	0.5	1
Bhaga_1	5022801	5022900	1	1	1	0.5	1	1	1	1	0.5	1
Bhaga_1	5026701	5026800	1	1	1	0.5	0.5	1	1	1	1	1
Bhaga_1	5027301	5027400	1	0.5	1	1	1	1	0.5	0.5	0.5	0.5
Bhaga_1	5027501	5027600	1	1	1	1	1	1	0.5	0.5	1	0.5
Bhaga_1	5027601	5027700	1	0.5	1	1	1	0.5	0.5	0.5	0.5	0.5
Bhaga_1	5028001	5028100	0.5	0.5	1	0.5	0.5	0.5	0.5	1	0.5	0.5
Bhaga_1	5028101	5028200	0.5	1	1	0.5	1	0.5	0.5	1	0.5	0.5
Bhaga_1	5029601	5029700	0.5	0	0	0	0	0	0	0	0	0.5
Bhaga_1	5035301	5035400	0.5	0.5	1	1	0.5	1	1	1	1	1
Bhaga_1	5035401	5035500	0.5	1	1	1	0.5	1	1	1	1	1
Bhaga_1	5035501	5035600	0.5	1	1	1	0.5	0.5	0.5	0.5	0.5	1
Bhaga_1	5035601	5035700	0.5	1	1	0.5	0.5	0.5	0.5	0.5	1	1
Bhaga_1	5037301	5037400	1	1	0.5	1	1	0.5	1	1	0.5	0.5
Bhaga_1	5037401	5037500	1	1	0.5	1	1	0.5	1	1	1	0.5
Bhaga_1	5037501	5037600	1	1	0.5	1	0.5	0.5	0.5	1	1	0.5
Bhaga_1	5040501	5040600	0.5	0.5	1	0.5	1	0.5	1	1	1	0.5
Bhaga_1	5057601	5057700	1	0.5	1	1	1	1	1	0.5	1	0.5
Bhaga_1	5059701	5059800	1	0.5	1	1	0.5	1	1	1	0.5	1
Bhaga_1	5061301	5061400	1	0.5	0.5	1	0.5	1	0.5	0.5	0.5	0.5
Bhaga_1	5061901	5062000	0.5	0.5	1	1	0.5	1	1	1	0.5	0.5
Bhaga_1	5065401	5065500	0.5	0.5	0	0.5	0	0.5	0	0	0	0
Bhaga_1	5065501	5065600	0	0.5	0	0	0.5	0	0.5	0	0	0.5
Bhaga_1	5076401	5076500	1	0.5	1	0.5	1	1	1	1	0.5	1
Bhaga_1	5091301	5091400	1	0.5	1	0.5	1	1	1	1	1	1
Bhaga_1	5092701	5092800	0.5	1	1	1	1	0.5	1	1	0.5	1
Bhaga_1	5123601	5123700	1	0.5	1	0.5	1	1	1	1	0.5	1
Bhaga_1	5125801	5125900	0.5	1	1	1	0.5	1	1	0.5	1	0.5
Bhaga_1	5126001	5126100	0.5	1	1	0.5	0.5	1	1	1	1	1
Bhaga_1	5126801	5126900	0.5	0.5	0.5	0	0.5	0.5	0	0.5	0.5	0.5
Bhaga_1	5127201	5127300	0.5	0	0	0	0	0	0	0	0	0.5
Bhaga_1	5130201	5130300	0	0	0	0.5	0	0.5	0.5	0	0	0
Bhaga_1	5131101	5131200	0.5	0.5	1	1	1	0.5	0.5	0.5	0.5	0.5
Bhaga_1	5134201	5134300	1	0.5	0.5	1	1	1	0.5	1	0.5	0.5
Bhaga_1	5136801	5136900	0.5	0.5	0.5	0	0.5	0	0.5	0.5	0	0.5
Bhaga_1	5140201	5140300	0.5	0.5	0.5	0.5	0	0.5	0	0.5	0.5	0.5
Bhaga_1	5140501	5140600	0.5	0.5	1	0.5	0.5	0.5	1	1	1	1
Bhaga_1	5140601	5140700	0.5	0.5	1	1	0.5	1	1	1	1	1
Bhaga_1	5140701	5140800	0.5	0.5	1	1	0.5	1	1	1	1	1
Bhaga_1	5141301	5141400	0.5	0.5	1	1	0.5	0.5	1	1	1	0.5
Bhaga_1	5141401	5141500	0.5	1	1	1	1	0.5	1	1	1	1
Bhaga_1	5142801	5142900	0.5	1	1	0.5	0.5	1	0.5	1	1	0.5
Bhaga_1	5142901	5143000	0.5	1	1	0.5	1	0.5	0.5	1	1	0.5
Bhaga_1	5145601	5145700	0	0	0.5	0.5	0.5	0.5	0	0	0.5	0
Bhaga_1	5145701	5145800	0	0	0	0.5	0	0.5	0	0	0	0
Bhaga_1	5145801	5145900	0.5	0	0	0.5	0	0.5	0	0	0	0.5
Bhaga_1	5147701	5147800	0	0.5	0	0.5	0	0.5	0	0	0	0
Bhaga_1	5148201	5148300	0.5	0.5	0.5	0	0.5	0.5	0.5	0.5	0.5	0
Bhaga_1	5148701	5148800	1	0.5	0.5	1	1	0.5	1	1	0.5	1
Bhaga_1	5151201	5151300	1	1	0.5	1	1	0.5	0.5	1	1	1
Bhaga_1	5162601	5162700	0.5	0	0	0	0	0	0.5	0	0	0.5
Bhaga_1	5175101	5175200	1	1	0.5	0.5	0.5	1	0.5	1	0.5	0.5
Bhaga_1	5178201	5178300	0	0	0.5	0	0	0.5	0	0	0	0.5
Bhaga_1	5179601	5179700	0.5	1	1	1	0.5	1	0.5	1	1	1
Bhaga_1	5179701	5179800	0.5	1	1	1	0.5	1	0.5	1	1	1
Bhaga_1	5179801	5179900	0.5	1	1	1	0.5	1	0.5	1	1	1
Bhaga_1	5180501	5180600	1	0.5	0.5	1	0.5	1	0.5	0.5	0.5	0.5
Bhaga_1	5182101	5182200	1	1	0.5	1	1	0.5	0.5	1	0.5	1
Bhaga_1	5188701	5188800	0.5	0.5	0.5	0.5	0.5	0.5	0.5	0	0	0.5
Bhaga_1	5189001	5189100	1	1	0.5	1	1	1	1	0.5	0.5	1
Bhaga_1	5189901	5190000	0.5	1	1	1	0.5	1	1	1	1	1
Bhaga_1	5196801	5196900	0.5	0.5	1	1	1	1	1	0.5	0.5	0.5
Bhaga_1	5199601	5199700	0	0.5	0.5	0.5	0.5	0.5	0	0.5	0	0
Bhaga_1	5201601	5201700	0.5	0.5	1	0.5	0.5	1	1	0.5	0.5	0.5
Bhaga_1	5202001	5202100	0	0	0.5	0	0	0.5	0	0	0.5	0
Bhaga_1	5202301	5202400	0	0	0.5	0	0.5	0.5	0.5	0.5	0	0
Bhaga_1	5204501	5204600	0	0.5	0	0	0	0	0	0	0	0.5
Bhaga_1	5204601	5204700	0	0.5	0	0	0	0	0	0	0	0.5
Bhaga_1	5212701	5212800	0.5	0	0.5	0.5	0.5	0	0.5	0	0	0
Bhaga_1	5217601	5217700	1	1	1	1	0.5	1	0.5	0.5	0.5	0.5
Bhaga_1	5224601	5224700	0.5	0.5	0.5	0	0	0.5	0.5	0	0.5	0
Bhaga_1	5228801	5228900	0.5	0.5	0.5	0.5	0.5	0.5	0	0	0	0.5
Bhaga_1	5233601	5233700	1	1	0.5	0.5	1	1	0.5	1	1	0.5
Bhaga_1	5235301	5235400	0.5	0	0	0.5	0.5	0	0	0	0	0
Bhaga_1	5237301	5237400	1	0.5	0.5	1	1	1	0.5	1	0.5	1
Bhaga_1	5242701	5242800	0.5	0.5	0	0	0.5	0.5	0	0	0.5	0
Bhaga_1	5243001	5243100	1	1	1	0.5	0.5	1	1	1	1	0.5
Bhaga_1	5245401	5245500	0.5	0.5	0.5	0.5	0.5	0.5	0.5	0.5	1	1
Bhaga_1	5245601	5245700	0.5	0.5	1	1	1	0.5	0.5	1	0.5	1
Bhaga_1	5245801	5245900	1	1	1	0.5	1	1	1	1	1	1
Bhaga_1	5245901	5246000	1	1	1	0.5	1	1	1	1	1	1
Bhaga_1	5246101	5246200	1	1	1	0.5	0.5	0.5	0.5	1	0.5	1
Bhaga_1	5246201	5246300	1	1	1	0.5	0.5	0.5	0.5	1	0.5	1
Bhaga_1	5246301	5246400	1	1	1	1	0.5	1	0.5	1	0.5	1
Bhaga_1	5246401	5246500	1	1	1	1	0.5	1	0.5	1	0.5	1
Bhaga_1	5246501	5246600	0.5	1	1	1	0.5	1	0.5	0.5	0.5	0.5
Bhaga_1	5246601	5246700	0.5	1	1	1	0.5	1	0.5	0.5	0.5	0.5
Bhaga_1	5246901	5247000	0	0	0	0.5	0	0	0.5	0	0	0
Bhaga_1	5247101	5247200	0	0	0	0.5	0	0	0.5	0	0	0
Bhaga_1	5252401	5252500	0	0.5	0	0.5	0.5	0	0	0.5	0.5	0.5
Bhaga_1	5255101	5255200	0.5	0	0.5	0.5	0.5	0.5	0	0.5	0.5	0.5
Bhaga_1	5255201	5255300	1	0.5	1	0.5	1	1	1	1	0.5	1
Bhaga_1	5258101	5258200	0.5	0.5	0	0.5	0	0	0.5	0.5	0.5	0
Bhaga_1	5258301	5258400	0.5	0.5	0	0	0	0	0.5	0.5	0.5	0.5
Bhaga_1	5258401	5258500	0.5	0.5	0	0	0.5	0	0.5	0.5	0.5	0
Bhaga_1	5258501	5258600	0.5	0.5	0.5	0	0.5	0	0.5	0.5	0.5	0.5
Bhaga_1	5266601	5266700	0.5	1	0.5	0.5	0.5	1	1	0.5	1	0.5
Bhaga_1	5266701	5266800	0.5	1	0.5	1	1	1	1	1	1	1
Bhaga_1	5269901	5270000	0	0.5	0	0	0	0	0	0	0	0
Bhaga_1	5286501	5286600	1	1	1	0.5	1	1	1	1	0.5	1
Bhaga_1	5286601	5286700	0.5	1	1	1	1	1	1	1	0.5	0.5
Bhaga_1	5306201	5306300	0.5	1	1	1	0.5	0.5	1	1	0.5	0.5
Bhaga_1	5306301	5306400	0.5	1	1	1	0.5	0.5	1	1	0.5	0.5
Bhaga_1	5309201	5309300	0.5	1	0.5	1	1	0.5	1	0.5	0.5	1
Bhaga_1	5309601	5309700	1	1	1	0.5	1	1	0.5	1	1	0.5
Bhaga_1	5309701	5309800	1	1	1	0.5	1	1	0.5	1	1	0.5
Bhaga_1	5310001	5310100	0.5	0	0.5	0	0.5	0.5	0	0	0	0.5
Bhaga_1	5314501	5314600	0.5	0.5	0	0.5	0.5	0.5	0	0.5	0.5	0.5
Bhaga_1	5317901	5318000	0	0	0.5	0	0.5	0	0	0	0.5	0
Bhaga_1	5320601	5320700	0	0.5	0.5	0	0	0	0	0.5	0	0
Bhaga_1	5325801	5325900	0.5	0	0.5	0.5	0	0	0	0.5	0	0.5
Bhaga_1	5330201	5330300	0.5	0.5	0.5	1	1	1	0.5	0.5	1	0.5
Bhaga_1	5337301	5337400	0.5	0.5	0.5	0.5	0	0.5	0.5	0.5	0	0.5
Bhaga_1	5337901	5338000	0.5	0.5	0.5	0.5	1	1	0.5	0.5	1	1
Bhaga_1	5338001	5338100	0.5	0.5	0.5	0.5	1	1	0.5	0.5	0.5	0.5
Bhaga_1	5338101	5338200	0.5	1	1	0.5	0.5	0.5	0.5	0.5	0.5	0.5
Bhaga_1	5338901	5339000	1	1	1	1	1	0.5	0.5	1	0.5	1
Bhaga_1	5339101	5339200	0	0	0	0	0	0	0	0.5	0.5	0
Bhaga_1	5339201	5339300	0.5	0.5	0.5	0.5	0.5	0	0	0.5	0.5	0.5
Bhaga_1	5342401	5342500	1	1	0.5	1	1	0.5	1	1	0.5	0.5
Bhaga_1	5349001	5349100	0	0.5	0.5	0.5	0.5	0	0.5	0.5	0.5	0.5
Bhaga_1	5351601	5351700	1	0.5	0.5	0.5	0.5	1	0.5	1	0.5	0.5
Bhaga_1	5351701	5351800	1	0.5	0.5	0.5	0.5	1	0.5	1	0.5	0.5
Bhaga_1	5352601	5352700	0	0	0.5	0.5	0	0.5	0.5	0	0	0
Bhaga_1	5353801	5353900	0.5	0.5	1	1	1	1	1	0.5	1	1
Bhaga_1	5356101	5356200	0.5	0.5	0	0.5	0.5	0	0	0	0	0.5
Bhaga_1	5356401	5356500	0.5	0.5	1	0.5	0.5	0.5	1	0.5	1	0.5
Bhaga_1	5357001	5357100	0.5	0.5	1	1	1	0.5	0.5	1	0.5	0.5
Bhaga_1	5362001	5362100	1	1	0.5	0.5	1	1	0.5	0.5	1	1
Bhaga_1	5372501	5372600	0	0.5	0	0	0	0.5	0	0	0	0
Bhaga_1	5373301	5373400	0.5	1	1	0.5	1	0.5	1	1	1	1
Bhaga_1	5373401	5373500	0.5	1	1	0.5	1	0.5	1	1	1	1
Bhaga_1	5375001	5375100	1	1	0.5	1	0.5	1	1	1	1	1
Bhaga_1	5378401	5378500	0.5	0.5	0.5	1	0.5	0.5	0.5	0.5	0.5	0.5
Bhaga_1	5378601	5378700	0.5	0	0.5	0	0.5	0	0.5	0	0.5	0
Bhaga_1	5383601	5383700	0	0	0.5	0	0	0	0	0.5	0.5	0.5
Bhaga_1	5385701	5385800	1	1	1	1	1	1	1	1	0.5	0.5
Bhaga_1	5388901	5389000	0.5	0	0	0.5	0	0	0	0.5	0	0.5
Bhaga_1	5390501	5390600	0.5	1	0.5	0.5	1	1	0.5	1	1	1
Bhaga_1	5390901	5391000	0.5	0.5	1	1	0.5	1	0.5	1	0.5	0.5
Bhaga_1	5398601	5398700	0.5	1	0.5	0.5	0.5	0.5	1	1	0.5	0.5
Bhaga_1	5399401	5399500	0.5	1	1	1	1	1	0.5	0.5	0.5	0.5
Bhaga_1	5400901	5401000	0.5	1	1	1	1	0.5	1	1	0.5	0.5
Bhaga_1	5401801	5401900	1	1	0.5	1	1	1	0.5	0.5	1	1
Bhaga_1	5405201	5405300	0	0	0	0	0.5	0	0	0.5	0.5	0.5
Bhaga_1	5406501	5406600	0.5	1	1	0.5	1	1	1	1	1	1
Bhaga_1	5410401	5410500	1	0.5	1	1	0.5	0.5	1	0.5	0.5	1
Bhaga_1	5411501	5411600	0.5	0.5	1	1	1	1	1	1	1	1
Bhaga_1	5423101	5423200	0.5	1	0.5	1	1	1	1	1	1	1
Bhaga_1	5433401	5433500	0.5	1	0.5	1	1	0.5	1	1	0.5	0.5
Bhaga_1	5454601	5454700	0.5	0.5	0.5	1	1	1	0.5	0.5	0.5	0.5
Bhaga_1	5463201	5463300	1	0.5	0.5	0.5	0.5	1	0.5	0.5	0.5	1
Bhaga_1	5470001	5470100	0	0	0.5	0	0.5	0	0	0	0.5	0
Bhaga_1	5470101	5470200	0.5	0	0.5	0	0.5	0	0	0.5	0.5	0
Bhaga_1	5470201	5470300	0	0	0.5	0	0.5	0	0	0.5	0.5	0
Bhaga_1	5470301	5470400	0	0	0.5	0	0.5	0	0	0.5	0.5	0
Bhaga_1	5476501	5476600	1	1	0.5	0.5	1	0.5	0.5	0.5	1	1
Bhaga_1	5480501	5480600	0.5	0	0.5	0	0	0.5	0	0	0	0
Bhaga_1	5480601	5480700	1	1	0.5	1	0.5	1	1	1	0.5	1
Bhaga_1	5480701	5480800	1	1	0.5	1	0.5	0.5	1	1	1	1
Bhaga_1	5480801	5480900	1	1	0.5	0.5	0.5	0.5	0.5	0.5	1	0.5
Bhaga_1	5481301	5481400	1	0.5	0.5	1	1	1	1	1	0.5	1
Bhaga_1	5483201	5483300	0.5	0.5	1	0.5	0.5	1	1	1	1	1
Bhaga_1	5483301	5483400	1	1	1	0.5	0.5	1	1	1	1	1
Bhaga_1	5486001	5486100	0.5	0	0.5	0	0	0.5	0	0	0	0
Bhaga_1	5488601	5488700	0.5	0.5	0.5	1	1	0.5	1	0.5	0.5	0.5
Bhaga_1	5488701	5488800	0.5	0.5	0.5	1	1	0.5	1	0.5	0.5	0.5
Bhaga_1	5489201	5489300	1	1	1	1	0.5	1	1	0.5	0.5	1
Bhaga_1	5489701	5489800	0.5	0.5	1	1	0.5	0.5	0.5	0.5	0.5	0.5
Bhaga_1	5493301	5493400	0	0.5	0.5	0.5	0	0.5	0.5	0.5	0	0.5
Bhaga_1	5518901	5519000	0.5	0	0.5	0	0	0.5	0	0	0.5	0
Bhaga_1	5523801	5523900	0.5	0.5	0	0	0	0	0	0	0	0
Bhaga_1	5530901	5531000	0.5	1	0.5	1	1	0.5	1	1	1	1
Bhaga_1	5532401	5532500	1	0.5	1	0.5	0.5	1	1	0.5	1	0.5
Bhaga_1	5532501	5532600	1	0.5	1	0.5	0.5	1	1	0.5	0.5	0.5
Bhaga_1	5532701	5532800	1	1	1	1	0.5	0.5	1	0.5	1	1
Bhaga_1	5539001	5539100	0	0.5	0.5	0.5	0.5	0.5	0	0.5	0.5	0.5
Bhaga_1	5539201	5539300	0	0	0.5	0	0	0	0	0	0	0.5
Bhaga_1	5540101	5540200	0.5	0.5	0.5	0.5	0.5	0	0	0.5	0.5	0.5
Bhaga_1	5540301	5540400	0.5	0.5	0.5	0.5	0	0	0.5	0.5	0.5	0
Bhaga_1	5541301	5541400	1	1	1	1	1	1	1	1	0.5	0.5
Bhaga_1	5541601	5541700	0.5	1	1	1	1	1	0.5	0.5	1	0.5
Bhaga_1	5542701	5542800	1	0.5	0.5	1	1	1	1	0.5	1	1
Bhaga_1	5542801	5542900	1	0.5	0.5	1	1	1	1	0.5	1	1
Bhaga_1	5549601	5549700	0.5	1	1	1	0.5	0.5	0.5	1	0.5	0.5
Bhaga_1	5550101	5550200	1	1	1	1	1	0.5	1	0.5	0.5	1
Bhaga_1	5550701	5550800	1	1	1	1	0.5	1	1	0.5	1	1
Bhaga_1	5551101	5551200	0.5	1	0.5	1	0.5	1	0.5	0.5	1	1
Bhaga_1	5552101	5552200	0.5	1	1	0.5	1	1	1	0.5	1	1
Bhaga_1	5553801	5553900	1	0.5	0.5	0.5	1	0.5	1	1	0.5	1
Bhaga_1	5555101	5555200	0.5	1	1	0.5	1	1	1	1	0.5	0.5
Bhaga_1	5555201	5555300	0.5	1	0.5	0.5	0.5	0.5	0.5	1	0.5	1
Bhaga_1	5555501	5555600	0.5	0.5	0.5	1	1	0.5	0.5	0.5	0.5	1
Bhaga_1	5555601	5555700	1	1	0.5	1	1	0.5	1	0.5	1	1
Bhaga_1	5555901	5556000	1	0.5	0.5	1	0.5	0.5	1	0.5	0.5	0.5
Bhaga_1	5557001	5557100	1	1	0.5	1	0.5	0.5	1	1	0.5	1
Bhaga_1	5557101	5557200	1	1	0.5	1	0.5	0.5	1	1	0.5	1
Bhaga_1	5557301	5557400	0.5	0	0	0	0.5	0.5	0	0.5	0	0.5
Bhaga_1	5559401	5559500	1	0.5	0.5	1	1	1	0.5	1	0.5	1
Bhaga_1	5559501	5559600	1	0.5	0.5	1	1	1	0.5	1	0.5	1
Bhaga_1	5569201	5569300	0.5	0.5	1	0.5	1	1	1	0.5	1	0.5
Bhaga_1	5572601	5572700	0	0	0	0.5	0	0.5	0	0	0	0
Bhaga_1	5573601	5573700	0.5	1	1	0.5	0.5	0.5	1	1	1	0.5
Bhaga_1	5580901	5581000	1	0.5	0.5	1	1	1	1	1	1	1
Bhaga_1	5581401	5581500	0.5	1	1	1	1	1	1	1	0.5	1
Bhaga_1	5581501	5581600	0.5	0.5	1	0.5	1	0.5	0.5	0.5	0.5	1
Bhaga_1	5581601	5581700	0.5	1	1	0.5	0.5	0.5	1	0.5	0.5	1
Bhaga_1	5585201	5585300	1	1	1	0.5	1	1	0.5	1	1	1
Bhaga_1	5585601	5585700	0.5	1	1	1	1	0.5	1	1	0.5	1
Bhaga_1	5586501	5586600	0.5	0.5	0	0.5	0.5	0.5	0.5	0.5	0	0
Bhaga_1	5586601	5586700	0.5	0.5	0	0.5	0	0.5	0.5	0.5	0.5	0
Bhaga_1	5591101	5591200	0	0	0	0	0	0.5	0	0.5	0	0
Bhaga_1	5593501	5593600	1	0.5	1	0.5	0.5	1	0.5	0.5	0.5	0.5
Bhaga_1	5596001	5596100	0.5	0.5	1	0.5	0.5	1	0.5	0.5	0.5	0.5
Bhaga_1	5596101	5596200	0.5	0.5	1	0.5	0.5	1	0.5	0.5	0.5	0.5
Bhaga_1	5598601	5598700	0.5	1	1	0.5	1	1	1	0.5	1	1
Bhaga_1	5600601	5600700	0	0	0	0	0	0	0.5	0.5	0.5	0
Bhaga_1	5603601	5603700	0.5	0.5	1	0.5	0.5	1	1	0.5	1	1
Bhaga_1	5603701	5603800	0.5	0.5	1	1	1	1	1	0.5	1	1
Bhaga_1	5614701	5614800	0.5	0.5	0.5	0.5	0.5	0	0.5	0.5	0	0
Bhaga_1	5616701	5616800	0.5	0.5	1	1	1	0.5	1	1	0.5	0.5
Bhaga_1	5616801	5616900	0.5	0.5	1	1	1	0.5	0.5	1	0.5	0.5
Bhaga_1	5619601	5619700	1	1	1	1	1	0.5	0.5	0.5	1	0.5
Bhaga_1	5627501	5627600	0.5	0.5	0.5	1	1	0.5	0.5	0.5	1	1
Bhaga_1	5627601	5627700	0.5	0.5	0.5	1	1	1	0.5	0.5	1	1
Bhaga_1	5628501	5628600	1	1	0.5	1	1	1	1	1	0.5	1
Bhaga_1	5629501	5629600	0.5	1	1	0.5	1	1	1	1	0.5	1
Bhaga_1	5629601	5629700	0.5	1	1	0.5	1	1	1	1	1	1
Bhaga_1	5629801	5629900	0.5	1	1	1	1	1	1	1	1	1
Bhaga_1	5630001	5630100	0.5	1	1	1	0.5	1	1	0.5	1	1
Bhaga_1	5630101	5630200	0.5	1	0.5	1	0.5	1	1	0.5	1	1
Bhaga_1	5630201	5630300	0.5	0.5	0.5	0.5	0.5	0.5	1	0.5	0.5	1
Bhaga_1	5630301	5630400	0.5	0.5	0.5	0.5	0.5	0.5	1	0.5	0.5	0.5
Bhaga_1	5631401	5631500	1	1	1	0.5	1	1	1	1	0.5	0.5
Bhaga_1	5631901	5632000	0	0	0.5	0	0	0.5	0.5	0.5	0.5	0.5
Bhaga_1	5634501	5634600	0	0	0	0.5	0	0	0	0.5	0	0
Bhaga_1	5635901	5636000	1	1	1	0.5	0.5	1	0.5	0.5	0.5	1
Bhaga_1	5636201	5636300	0.5	1	1	0.5	0.5	1	1	1	1	0.5
Bhaga_1	5636301	5636400	0.5	1	1	0.5	0.5	1	1	1	1	0.5
Bhaga_1	5636401	5636500	0.5	1	1	0.5	0.5	1	1	1	1	0.5
Bhaga_1	5637001	5637100	1	1	1	1	1	0.5	0.5	0.5	1	1
Bhaga_1	5640401	5640500	0.5	0.5	0	0	0.5	0	0.5	0.5	0.5	0
Bhaga_1	5640501	5640600	0.5	0.5	0	0	0.5	0	0.5	0.5	0.5	0
Bhaga_1	5642601	5642700	1	0.5	1	0.5	1	1	1	1	1	0.5
Bhaga_1	5644401	5644500	0.5	1	1	1	1	1	1	1	0.5	0.5
Bhaga_1	5644601	5644700	0.5	1	1	1	1	0.5	1	1	1	1
Bhaga_1	5644701	5644800	0.5	1	1	0.5	1	1	1	1	1	1
Bhaga_1	5645901	5646000	0.5	0.5	0.5	1	0.5	1	1	0.5	0.5	0.5
Bhaga_1	5646001	5646100	1	0.5	0.5	1	0.5	1	1	0.5	0.5	0.5
Bhaga_1	5646401	5646500	0.5	1	1	0.5	1	0.5	0.5	1	0.5	0.5
Bhaga_1	5646601	5646700	1	1	0.5	1	0.5	0.5	1	1	0.5	0.5
Bhaga_1	5646901	5647000	0.5	0.5	1	1	0.5	0.5	0.5	1	0.5	0.5
Bhaga_1	5647001	5647100	0.5	0.5	1	1	0.5	0.5	0.5	1	0.5	0.5
Bhaga_1	5648801	5648900	0.5	0.5	1	0.5	1	0.5	0.5	0.5	0.5	0.5
Bhaga_1	5652001	5652100	0.5	1	1	1	0.5	0.5	1	1	0.5	1
Bhaga_1	5652101	5652200	0.5	0.5	1	1	0.5	0.5	0.5	1	0.5	1
Bhaga_1	5652301	5652400	0.5	0.5	1	0.5	1	1	1	1	0.5	0.5
Bhaga_1	5652401	5652500	0.5	0.5	1	0.5	1	1	1	1	1	1
Bhaga_1	5660901	5661000	1	1	1	0.5	0.5	0.5	0.5	0.5	0.5	0.5
Bhaga_1	5662601	5662700	1	1	1	1	1	0.5	0.5	0.5	1	1
Bhaga_1	5663801	5663900	1	1	0.5	1	0.5	0.5	0.5	0.5	1	1
Bhaga_1	5663901	5664000	1	1	0.5	1	0.5	0.5	0.5	0.5	1	1
Bhaga_1	5665301	5665400	0.5	0.5	1	1	1	0.5	1	0.5	1	1
Bhaga_1	5665401	5665500	0.5	0.5	1	1	0.5	0.5	1	0.5	1	1
Bhaga_1	5665501	5665600	0.5	0.5	1	1	0.5	0.5	1	0.5	1	1
Bhaga_1	5671801	5671900	0.5	1	0.5	0.5	0.5	0.5	1	0.5	0.5	0.5
Bhaga_1	5677201	5677300	0.5	0	0.5	0.5	0	0	0	0.5	0.5	0
Bhaga_1	5677301	5677400	0.5	0.5	1	1	0.5	0.5	0.5	1	1	0.5
Bhaga_1	5678201	5678300	0.5	0.5	0.5	1	1	0.5	0.5	1	1	0.5
Bhaga_1	5678701	5678800	0.5	0.5	1	0.5	1	0.5	0.5	0.5	0.5	1
Bhaga_1	5679801	5679900	0.5	0	0.5	0	0.5	0.5	0.5	0.5	0.5	0.5
Bhaga_1	5681401	5681500	0.5	1	0.5	1	1	1	1	0.5	1	1
Bhaga_1	5682801	5682900	0.5	1	1	1	0.5	0.5	1	1	0.5	1
Bhaga_1	5683401	5683500	1	1	0.5	1	1	0.5	1	0.5	0.5	1
Bhaga_1	5683601	5683700	0	0	0	0.5	0.5	0	0.5	0.5	0.5	0.5
Bhaga_1	5684701	5684800	1	1	0.5	0.5	1	0.5	1	0.5	0.5	1
Bhaga_1	5684801	5684900	1	1	0.5	0.5	1	0.5	1	0.5	0.5	1
Bhaga_1	5685201	5685300	1	0.5	0.5	0.5	0.5	1	0.5	0.5	1	1
Bhaga_1	5685601	5685700	1	1	1	1	1	1	0.5	0.5	1	1
Bhaga_1	5686001	5686100	0.5	0.5	1	1	0.5	1	0.5	1	1	1
Bhaga_1	5686901	5687000	1	0.5	1	0.5	1	1	1	1	1	1
Bhaga_1	5687701	5687800	0.5	1	1	1	1	1	0.5	1	1	0.5
Bhaga_1	5687801	5687900	1	1	0.5	1	1	0.5	1	1	1	1
Bhaga_1	5691601	5691700	0.5	0.5	1	1	1	0.5	0.5	1	1	1
Bhaga_1	5692101	5692200	0	0.5	0.5	0	0	0.5	0.5	0	0.5	0.5
Bhaga_1	5694201	5694300	0	0	0	0	0	0.5	0.5	0.5	0.5	0
Bhaga_1	5694301	5694400	0.5	1	0.5	1	0.5	0.5	0.5	1	0.5	1
Bhaga_1	5694401	5694500	0.5	1	0.5	1	0.5	0.5	0.5	1	0.5	1
Bhaga_1	5694601	5694700	1	1	0.5	1	1	0.5	0.5	1	0.5	1
Bhaga_1	5694801	5694900	1	0.5	0.5	1	1	0.5	1	1	1	1
Bhaga_1	5695001	5695100	1	1	1	0.5	1	0.5	1	1	0.5	1
Bhaga_1	5697501	5697600	0.5	1	0.5	0.5	0.5	1	0.5	1	0.5	0.5
Bhaga_1	5698101	5698200	1	0.5	0.5	0.5	0.5	1	0.5	0.5	1	0.5
Bhaga_1	5699001	5699100	0	0.5	0.5	0	0	0.5	0.5	0.5	0	0
Bhaga_1	5702101	5702200	0.5	0	0	0	0.5	0	0	0	0	0.5
Bhaga_1	5702301	5702400	1	0.5	1	0.5	1	0.5	1	1	0.5	0.5
Bhaga_1	5703801	5703900	0.5	0.5	0.5	0.5	0.5	0.5	0	0.5	0	0
Bhaga_1	5703901	5704000	0	0	0.5	0.5	0	0	0	0	0	0
Bhaga_1	5710001	5710100	0.5	0.5	0.5	0.5	0	0	0	0.5	0.5	0
Bhaga_1	5720801	5720900	1	1	1	1	1	0.5	0.5	1	0.5	1
Bhaga_1	5721101	5721200	0	0	0.5	0.5	0	0	0.5	0.5	0	0.5
Bhaga_1	5728801	5728900	0.5	0.5	1	0.5	0.5	1	1	1	1	0.5
Bhaga_1	5740101	5740200	1	1	1	0.5	1	1	1	0.5	0.5	1
Bhaga_1	5741801	5741900	0.5	0.5	1	1	0.5	0.5	0.5	1	1	0.5
Bhaga_1	5747601	5747700	1	1	1	0.5	1	0.5	1	0.5	1	1
Bhaga_1	5747701	5747800	1	0.5	0.5	1	1	1	1	1	1	0.5
Bhaga_1	5748101	5748200	0.5	1	1	0.5	0.5	1	1	0.5	1	1
Bhaga_1	5748201	5748300	0.5	1	0.5	1	0.5	1	1	1	1	1
Bhaga_1	5750101	5750200	1	0.5	1	1	1	1	1	0.5	1	0.5
Bhaga_1	5751401	5751500	1	1	0.5	0.5	1	1	0.5	1	1	1
Bhaga_1	5765601	5765700	1	1	1	0.5	1	1	0.5	0.5	1	1
Bhaga_1	5767001	5767100	1	0.5	0.5	1	1	0.5	0.5	0.5	1	0.5
Bhaga_1	5767501	5767600	0.5	1	1	1	0.5	1	1	1	1	1
Bhaga_1	5769601	5769700	1	0.5	0.5	1	0.5	0.5	0.5	0.5	0.5	0.5
Bhaga_1	5770101	5770200	0.5	0.5	1	0.5	1	0.5	0.5	1	0.5	1
Bhaga_1	5770201	5770300	0.5	0.5	0.5	0.5	1	1	1	0.5	0.5	0.5
Bhaga_1	5770301	5770400	0.5	1	1	1	1	1	1	0.5	1	1
Bhaga_1	5770701	5770800	0.5	0.5	0.5	0.5	0.5	0	0	0.5	0.5	0.5
Bhaga_1	5773701	5773800	0.5	0.5	0.5	1	1	1	1	0.5	0.5	0.5
Bhaga_1	5773801	5773900	0.5	0.5	1	1	1	1	1	0.5	1	0.5
Bhaga_1	5773901	5774000	0.5	0.5	1	0.5	0.5	0.5	1	0.5	1	0.5
Bhaga_1	5779701	5779800	0.5	1	0.5	1	1	1	0.5	1	1	1
Bhaga_1	5779801	5779900	1	1	1	0.5	0.5	1	1	1	1	0.5
Bhaga_1	5781301	5781400	1	1	0.5	1	1	0.5	1	1	1	1
Bhaga_1	5781501	5781600	0.5	0.5	1	1	0.5	0.5	1	1	1	1
Bhaga_1	5794701	5794800	1	1	0.5	1	0.5	1	1	1	1	0.5
Bhaga_1	5800701	5800800	0.5	0.5	0.5	0	0	0.5	0.5	0	0.5	0
Bhaga_1	5803201	5803300	0	0	0.5	0	0	0	0.5	0	0	0.5
Bhaga_1	5804301	5804400	0.5	0.5	0.5	0.5	0.5	0.5	1	1	1	0.5
Bhaga_1	5809901	5810000	0.5	0.5	0	0	0.5	0.5	0.5	0	0	0.5
Bhaga_1	5810001	5810100	0.5	0.5	0	0	0.5	0.5	0.5	0.5	0.5	0.5
Bhaga_1	5810401	5810500	1	1	0.5	0.5	1	1	1	1	0.5	1
Bhaga_1	5811201	5811300	1	1	1	0.5	1	1	1	1	1	1
Bhaga_1	5811501	5811600	0.5	1	1	1	1	1	1	0.5	1	0.5
Bhaga_1	5811701	5811800	1	0.5	1	1	1	1	1	0.5	1	0.5
[truncated: 252,301+ more rows]

## Sheet: DMR_matrix_tree109
seqnames	start	end	N1-36.6	N22-33A	N21-35.3A	S-31.8-A	N21-32A	S35.6-A1	S35.7-A21
Bhaga_1	3401	3500	0.5	1	0.5	1	1	1	0.5
Bhaga_1	6101	6200	1	1	0.5	0.5	1	0.5	1
Bhaga_1	19601	19700	0.5	1	0.5	1	1	0.5	0.5
Bhaga_1	30301	30400	0.5	0	0.5	0	0	0.5	0
Bhaga_1	41001	41100	0.5	0.5	1	0.5	1	1	1
Bhaga_1	48601	48700	1	0.5	0.5	1	1	0.5	1
Bhaga_1	62501	62600	0.5	1	0.5	1	1	0.5	0.5
Bhaga_1	71701	71800	0	0	0.5	0	0.5	0	0.5
Bhaga_1	75001	75100	0.5	1	1	1	1	0.5	0.5
Bhaga_1	86401	86500	0.5	1	1	0.5	1	1	0.5
Bhaga_1	86501	86600	0.5	1	1	0.5	1	1	0.5
Bhaga_1	102901	103000	1	1	1	0.5	0.5	1	0.5
Bhaga_1	103001	103100	1	1	1	0.5	0.5	1	0.5
Bhaga_1	111601	111700	0	0.5	0	0	0	0.5	0.5
Bhaga_1	128701	128800	1	1	0.5	0.5	1	1	0.5
Bhaga_1	154501	154600	0	0.5	0	0	0.5	0.5	0.5
Bhaga_1	154701	154800	0.5	0.5	0.5	0	0.5	0	0
Bhaga_1	164101	164200	0.5	1	1	0.5	1	0.5	1
Bhaga_1	168801	168900	0.5	1	0.5	1	0.5	1	1
Bhaga_1	169201	169300	0	0	0.5	0	0.5	0	0.5
Bhaga_1	169301	169400	0	0	0.5	0	0.5	0	0.5
Bhaga_1	173401	173500	0.5	0.5	0.5	0.5	1	1	1
Bhaga_1	182001	182100	0.5	0.5	1	1	1	0.5	1
Bhaga_1	182101	182200	0.5	0.5	1	1	1	1	0.5
Bhaga_1	184901	185000	1	0.5	1	1	0.5	0.5	1
Bhaga_1	187901	188000	1	0.5	0.5	0.5	1	1	1
Bhaga_1	199501	199600	0	0.5	0	0	0.5	0	0.5
Bhaga_1	202101	202200	1	1	0.5	0.5	0.5	1	1
Bhaga_1	205701	205800	1	0.5	1	0.5	0.5	1	1
Bhaga_1	213301	213400	1	0.5	0.5	0.5	1	1	0.5
Bhaga_1	214801	214900	1	1	1	0.5	0.5	1	0.5
Bhaga_1	215301	215400	1	0.5	0.5	1	0.5	0.5	1
Bhaga_1	216301	216400	1	0.5	1	1	1	0.5	0.5
Bhaga_1	216401	216500	1	0.5	1	1	1	0.5	0.5
Bhaga_1	219301	219400	0.5	0.5	1	1	1	1	0.5
Bhaga_1	219801	219900	0.5	0.5	1	1	1	1	0.5
Bhaga_1	223201	223300	0	0.5	0.5	0	0.5	0	0.5
Bhaga_1	233301	233400	0.5	1	0.5	1	1	1	0.5
Bhaga_1	239601	239700	1	1	1	1	0.5	0.5	0.5
Bhaga_1	240001	240100	0.5	1	0.5	1	0.5	1	1
Bhaga_1	245801	245900	1	0.5	1	0.5	1	1	0.5
Bhaga_1	250701	250800	1	0.5	1	0.5	0.5	1	1
Bhaga_1	254901	255000	1	1	1	1	0.5	0.5	0.5
Bhaga_1	272201	272300	1	0.5	1	0.5	1	0.5	1
Bhaga_1	279101	279200	0.5	0.5	0.5	0	0	0.5	0
Bhaga_1	282901	283000	0.5	0.5	1	0.5	1	1	1
Bhaga_1	284001	284100	0.5	1	1	0.5	1	1	0.5
Bhaga_1	286701	286800	0.5	0.5	1	1	1	1	0.5
Bhaga_1	286801	286900	1	0.5	1	0.5	1	0.5	0.5
Bhaga_1	287001	287100	0.5	1	1	0.5	0.5	1	0.5
Bhaga_1	293301	293400	0.5	1	1	1	1	0.5	0.5
Bhaga_1	293501	293600	0.5	0.5	1	1	0.5	0.5	1
Bhaga_1	297201	297300	0	0.5	0	0	0.5	0	0.5
Bhaga_1	329001	329100	0.5	0.5	0.5	1	1	0.5	1
Bhaga_1	329101	329200	0.5	0.5	0.5	1	1	0.5	1
Bhaga_1	331601	331700	0.5	1	1	0.5	0.5	1	1
Bhaga_1	331801	331900	0.5	1	0.5	1	0.5	1	0.5
Bhaga_1	335501	335600	1	0.5	1	1	0.5	1	0.5
Bhaga_1	335701	335800	1	0.5	1	0.5	1	0.5	0.5
Bhaga_1	335801	335900	1	0.5	1	0.5	1	0.5	1
Bhaga_1	335901	336000	0.5	0.5	1	0.5	0.5	1	1
Bhaga_1	341501	341600	0.5	1	0.5	0.5	0.5	1	1
Bhaga_1	345401	345500	0.5	1	1	0.5	0.5	0.5	1
Bhaga_1	345501	345600	0.5	0.5	1	1	0.5	0.5	1
Bhaga_1	346401	346500	0.5	1	0.5	1	0.5	0.5	1
Bhaga_1	347101	347200	0.5	1	1	1	1	0.5	0.5
Bhaga_1	349401	349500	0.5	1	1	1	0.5	0.5	1
Bhaga_1	351301	351400	1	1	0.5	0.5	1	0.5	0.5
Bhaga_1	353901	354000	1	0.5	0.5	0.5	1	1	0.5
Bhaga_1	355101	355200	0.5	0	0	0	0.5	0.5	0
Bhaga_1	367401	367500	0.5	0.5	0.5	1	1	0.5	1
Bhaga_1	384401	384500	0.5	0.5	1	0.5	1	1	1
Bhaga_1	421301	421400	0.5	0	0.5	0.5	0.5	0	0
Bhaga_1	424301	424400	0	0	0.5	0.5	0	0.5	0
Bhaga_1	426501	426600	0.5	1	1	0.5	1	0.5	1
Bhaga_1	428801	428900	1	0.5	1	1	0.5	0.5	1
Bhaga_1	434101	434200	0.5	1	1	0.5	0.5	1	1
Bhaga_1	450901	451000	0.5	1	1	0.5	0.5	1	1
Bhaga_1	452601	452700	0	0.5	0	0.5	0	0.5	0.5
Bhaga_1	458901	459000	0.5	0	0.5	0	0.5	0	0.5
Bhaga_1	466201	466300	1	0.5	0.5	1	0.5	1	1
Bhaga_1	466401	466500	1	0.5	1	0.5	0.5	1	1
Bhaga_1	490601	490700	0.5	1	0.5	1	0.5	0.5	1
Bhaga_1	496101	496200	0.5	0	0	0.5	0.5	0	0
Bhaga_1	501201	501300	1	0.5	1	0.5	0.5	1	0.5
Bhaga_1	519301	519400	1	0.5	0.5	1	0.5	1	1
Bhaga_1	534901	535000	1	1	0.5	1	1	0.5	0.5
Bhaga_1	535101	535200	0.5	1	1	1	0.5	1	0.5
Bhaga_1	543601	543700	0.5	1	1	1	0.5	0.5	1
Bhaga_1	549201	549300	1	1	1	0.5	0.5	0.5	0.5
Bhaga_1	550001	550100	0.5	0.5	0	0.5	0.5	0	0
Bhaga_1	554401	554500	0	0.5	0.5	0	0.5	0	0
Bhaga_1	569501	569600	0.5	0.5	0	0	0	0.5	0.5
Bhaga_1	570001	570100	1	1	0.5	1	0.5	0.5	1
Bhaga_1	573201	573300	0.5	0.5	1	0.5	1	1	0.5
Bhaga_1	578201	578300	0.5	0.5	0.5	1	0.5	1	1
Bhaga_1	584401	584500	0.5	0	0.5	0.5	0	0	0.5
Bhaga_1	588101	588200	1	0.5	1	0.5	1	1	0.5
Bhaga_1	588401	588500	1	1	0.5	0.5	1	1	0.5
Bhaga_1	588601	588700	0.5	1	1	0.5	1	1	0.5
Bhaga_1	592101	592200	0.5	1	0.5	1	1	1	0.5
Bhaga_1	593501	593600	0.5	1	1	0.5	1	0.5	0.5
Bhaga_1	594101	594200	0.5	1	0.5	1	0.5	0.5	1
Bhaga_1	594201	594300	0.5	1	0.5	1	0.5	0.5	1
Bhaga_1	594701	594800	1	1	0.5	0.5	1	0.5	0.5
Bhaga_1	595101	595200	1	0.5	1	1	1	0.5	0.5
Bhaga_1	601401	601500	0.5	0.5	1	1	0.5	0.5	1
Bhaga_1	612101	612200	1	0.5	1	1	1	0.5	0.5
Bhaga_1	614001	614100	0.5	0.5	0.5	0	0	0	0.5
Bhaga_1	618901	619000	0.5	0	0.5	0	0.5	0	0.5
Bhaga_1	619201	619300	1	1	1	0.5	0.5	1	0.5
Bhaga_1	630101	630200	0	0.5	0	0.5	0.5	0	0
Bhaga_1	630301	630400	0.5	0.5	0	0.5	0	0	0.5
Bhaga_1	651401	651500	0.5	0.5	1	1	1	1	0.5
Bhaga_1	670601	670700	0	0.5	0.5	0	0	0	0.5
Bhaga_1	670701	670800	0	0.5	0.5	0	0	0	0.5
Bhaga_1	682501	682600	1	0.5	1	1	0.5	0.5	0.5
Bhaga_1	683101	683200	0	0.5	0.5	0	0	0	0.5
Bhaga_1	685301	685400	0.5	1	0.5	0.5	1	1	0.5
Bhaga_1	693901	694000	1	1	0.5	1	0.5	1	0.5
Bhaga_1	700201	700300	1	1	1	0.5	0.5	0.5	0.5
Bhaga_1	700301	700400	1	1	1	0.5	1	0.5	0.5
Bhaga_1	705801	705900	0.5	0	0.5	0.5	0	0.5	0
Bhaga_1	705901	706000	0.5	0	0.5	0.5	0	0.5	0
Bhaga_1	706001	706100	0.5	0.5	0	0.5	0	0.5	0
Bhaga_1	707201	707300	0.5	0	0	0.5	0	0.5	0.5
Bhaga_1	707601	707700	0	0.5	0	0.5	0	0.5	0.5
Bhaga_1	721701	721800	1	1	0.5	0.5	1	0.5	1
Bhaga_1	725601	725700	1	1	0.5	0.5	0.5	1	1
Bhaga_1	730801	730900	0.5	1	1	1	0.5	0.5	0.5
Bhaga_1	730901	731000	0.5	1	1	1	0.5	0.5	1
Bhaga_1	731801	731900	0.5	1	0.5	0.5	1	1	1
Bhaga_1	741001	741100	0.5	0.5	1	0.5	1	1	0.5
Bhaga_1	741101	741200	0.5	0.5	1	0.5	1	1	1
Bhaga_1	742101	742200	0.5	1	0.5	0.5	1	0.5	1
Bhaga_1	748401	748500	1	1	0.5	0.5	1	0.5	0.5
Bhaga_1	750701	750800	1	0.5	1	0.5	1	1	0.5
Bhaga_1	752901	753000	1	1	1	1	0.5	0.5	0.5
Bhaga_1	754101	754200	0.5	0.5	1	1	0.5	1	0.5
Bhaga_1	764101	764200	0.5	0.5	0	0.5	0	0	0
Bhaga_1	766101	766200	0.5	0.5	0	0	0.5	0.5	0
Bhaga_1	766401	766500	1	0.5	1	1	0.5	0.5	0.5
Bhaga_1	768401	768500	0.5	0.5	1	0.5	1	1	0.5
Bhaga_1	768501	768600	0.5	0.5	1	0.5	1	1	1
Bhaga_1	768601	768700	0.5	0.5	1	0.5	1	1	1
Bhaga_1	769201	769300	1	1	0.5	1	0.5	0.5	0.5
Bhaga_1	769901	770000	1	0.5	0.5	1	1	1	0.5
Bhaga_1	771301	771400	0	0	0.5	0.5	0	0.5	0.5
Bhaga_1	772101	772200	0	0.5	0	0	0.5	0.5	0.5
Bhaga_1	774101	774200	1	0.5	1	1	0.5	0.5	1
Bhaga_1	774201	774300	1	0.5	1	1	0.5	0.5	1
Bhaga_1	774301	774400	1	0.5	1	1	0.5	0.5	1
Bhaga_1	776401	776500	1	1	0.5	0.5	1	1	0.5
Bhaga_1	780601	780700	1	1	1	0.5	0.5	1	0.5
Bhaga_1	782101	782200	0.5	1	1	0.5	1	1	0.5
Bhaga_1	784801	784900	0.5	1	0.5	1	0.5	0.5	1
Bhaga_1	784901	785000	1	1	0.5	1	0.5	0.5	1
Bhaga_1	785001	785100	1	1	0.5	1	0.5	0.5	1
Bhaga_1	787801	787900	0	0.5	0.5	0	0	0.5	0.5
Bhaga_1	789301	789400	1	1	1	1	0.5	0.5	0.5
Bhaga_1	790101	790200	0.5	1	1	0.5	1	0.5	0.5
Bhaga_1	797501	797600	0.5	1	1	0.5	1	0.5	0.5
Bhaga_1	802301	802400	0	0.5	0	0	0	0.5	0.5
Bhaga_1	803501	803600	0.5	0.5	0.5	1	1	1	1
Bhaga_1	810201	810300	1	1	1	0.5	0.5	0.5	1
Bhaga_1	816901	817000	0	0.5	0	0.5	0	0.5	0.5
Bhaga_1	818501	818600	1	1	1	0.5	0.5	0.5	1
Bhaga_1	818601	818700	1	1	1	0.5	0.5	0.5	0.5
Bhaga_1	818801	818900	0.5	0.5	0	0	0.5	0	0
Bhaga_1	836301	836400	0.5	0.5	1	0.5	1	0.5	1
Bhaga_1	849801	849900	0	0.5	0.5	0.5	0	0	0
Bhaga_1	855601	855700	0	0	0	0.5	0	0.5	0.5
Bhaga_1	869501	869600	0.5	0.5	1	1	1	0.5	1
Bhaga_1	873701	873800	1	1	1	0.5	0.5	0.5	1
Bhaga_1	873801	873900	1	1	0.5	0.5	0.5	0.5	1
Bhaga_1	876001	876100	0.5	1	1	0.5	1	1	0.5
Bhaga_1	879001	879100	1	0.5	1	0.5	0.5	1	0.5
Bhaga_1	882901	883000	0.5	0.5	0.5	1	1	1	0.5
Bhaga_1	883001	883100	0.5	0.5	1	1	1	0.5	0.5
Bhaga_1	889201	889300	0	0	0.5	0.5	0.5	0	0
Bhaga_1	895401	895500	0.5	1	0.5	1	1	0.5	1
Bhaga_1	900201	900300	0.5	0	0	0	0.5	0	0.5
Bhaga_1	911401	911500	0	0.5	0.5	0.5	0	0	0
Bhaga_1	918501	918600	0.5	0.5	0	0	0	0.5	0
Bhaga_1	918601	918700	0.5	0.5	0	0	0	0.5	0.5
Bhaga_1	918701	918800	0	0.5	0	0.5	0	0.5	0.5
Bhaga_1	919601	919700	0	0.5	0.5	0	0.5	0	0
Bhaga_1	923801	923900	0.5	1	0.5	0.5	0.5	1	1
Bhaga_1	930701	930800	0	0	0	0.5	0	0.5	0.5
Bhaga_1	932401	932500	0	0	0	0.5	0	0.5	0.5
Bhaga_1	933201	933300	0.5	0	0.5	0	0.5	0	0.5
Bhaga_1	937801	937900	1	0.5	1	0.5	0.5	1	0.5
Bhaga_1	940001	940100	0.5	0.5	1	1	1	1	0.5
Bhaga_1	956801	956900	1	1	0.5	0.5	0.5	1	1
Bhaga_1	957001	957100	1	0.5	1	0.5	1	0.5	1
Bhaga_1	958801	958900	0.5	0.5	0.5	0.5	1	1	1
Bhaga_1	959301	959400	0	0.5	0.5	0.5	0	0.5	0
Bhaga_1	959401	959500	0	0	0.5	0.5	0	0.5	0
Bhaga_1	960201	960300	1	0.5	0.5	1	0.5	0.5	1
Bhaga_1	961801	961900	1	1	0.5	1	0.5	1	0.5
Bhaga_1	970401	970500	1	1	0.5	0.5	0.5	1	1
Bhaga_1	975701	975800	0.5	1	0.5	0.5	1	1	1
Bhaga_1	980801	980900	0.5	0.5	0.5	0	0	0	0
Bhaga_1	980901	981000	0.5	1	0.5	1	1	0.5	1
Bhaga_1	982601	982700	0.5	1	1	1	1	0.5	0.5
Bhaga_1	985101	985200	1	1	0.5	0.5	0.5	1	0.5
Bhaga_1	987101	987200	0	0	0	0.5	0.5	0.5	0
Bhaga_1	1012101	1012200	1	0.5	0.5	1	0.5	1	0.5
Bhaga_1	1015801	1015900	0.5	0	0.5	0	0	0	0.5
Bhaga_1	1016801	1016900	0.5	1	0.5	0.5	1	1	1
Bhaga_1	1016901	1017000	0.5	1	0.5	0.5	1	1	1
Bhaga_1	1040801	1040900	1	0.5	1	0.5	1	1	0.5
Bhaga_1	1051801	1051900	0.5	1	1	0.5	1	0.5	1
Bhaga_1	1052001	1052100	0.5	1	1	1	0.5	0.5	1
Bhaga_1	1054901	1055000	1	0.5	1	0.5	1	0.5	0.5
Bhaga_1	1056201	1056300	0	0.5	0.5	0	0.5	0	0
Bhaga_1	1056301	1056400	0	0.5	0.5	0	0.5	0.5	0
Bhaga_1	1056401	1056500	0	0.5	0.5	0	0.5	0.5	0
Bhaga_1	1067401	1067500	0	0.5	0	0.5	0	0.5	0.5
Bhaga_1	1069701	1069800	0	0.5	0	0.5	0.5	0	0.5
Bhaga_1	1073401	1073500	0.5	0.5	0.5	0.5	1	1	1
Bhaga_1	1089901	1090000	0.5	1	1	0.5	0.5	0.5	1
Bhaga_1	1090001	1090100	1	1	1	0.5	0.5	0.5	1
Bhaga_1	1090201	1090300	1	0.5	1	1	1	0.5	0.5
Bhaga_1	1097201	1097300	0.5	1	0.5	1	1	0.5	0.5
Bhaga_1	1099901	1100000	0	0.5	0	0.5	0.5	0.5	0
Bhaga_1	1127201	1127300	0.5	0.5	1	1	1	0.5	0.5
Bhaga_1	1127301	1127400	0.5	0.5	1	1	1	0.5	0.5
Bhaga_1	1129901	1130000	0	0.5	0.5	0.5	0.5	0	0
Bhaga_1	1133501	1133600	0	0.5	0.5	0.5	0	0	0
Bhaga_1	1133601	1133700	0.5	1	0.5	0.5	0.5	1	1
Bhaga_1	1133701	1133800	0.5	1	0.5	0.5	1	1	1
Bhaga_1	1140501	1140600	0.5	0.5	0.5	0	0	0.5	0
Bhaga_1	1140701	1140800	0.5	1	1	0.5	0.5	1	0.5
Bhaga_1	1141101	1141200	0.5	0.5	1	1	1	0.5	0.5
Bhaga_1	1144501	1144600	0.5	0.5	0.5	0	0	0.5	0
Bhaga_1	1144801	1144900	0.5	1	1	0.5	1	0.5	0.5
Bhaga_1	1145101	1145200	1	0.5	1	1	0.5	1	0.5
Bhaga_1	1146901	1147000	1	1	0.5	1	0.5	0.5	0.5
Bhaga_1	1151201	1151300	1	1	0.5	1	1	0.5	0.5
Bhaga_1	1154201	1154300	0	0.5	0.5	0	0.5	0.5	0
Bhaga_1	1155201	1155300	0.5	0.5	0	0.5	0	0	0.5
Bhaga_1	1156501	1156600	0	0	0.5	0.5	0.5	0	0.5
Bhaga_1	1157401	1157500	0.5	1	0.5	1	0.5	0.5	1
Bhaga_1	1157801	1157900	0	0.5	0	0	0.5	0	0.5
Bhaga_1	1160701	1160800	0.5	0.5	1	0.5	1	1	1
Bhaga_1	1160901	1161000	1	0.5	0.5	1	1	0.5	1
Bhaga_1	1177501	1177600	1	1	0.5	1	0.5	0.5	0.5
Bhaga_1	1178401	1178500	0.5	0.5	1	1	1	0.5	1
Bhaga_1	1182601	1182700	0.5	1	0.5	0.5	1	1	1
Bhaga_1	1191301	1191400	0.5	0.5	1	1	1	0.5	1
Bhaga_1	1191401	1191500	0.5	0.5	1	1	1	0.5	1
Bhaga_1	1191601	1191700	0.5	0.5	0.5	1	1	1	1
Bhaga_1	1194901	1195000	0.5	1	1	0.5	0.5	1	1
Bhaga_1	1225101	1225200	0.5	0.5	0.5	1	0.5	1	1
Bhaga_1	1231901	1232000	1	0.5	1	0.5	0.5	0.5	1
Bhaga_1	1232501	1232600	0.5	0.5	0.5	0	0	0.5	0
Bhaga_1	1233501	1233600	0.5	1	0.5	1	1	0.5	1
Bhaga_1	1233601	1233700	1	1	0.5	1	1	0.5	0.5
Bhaga_1	1240901	1241000	0.5	0.5	1	1	1	0.5	0.5
Bhaga_1	1241901	1242000	0	0	0	0.5	0	0.5	0.5
Bhaga_1	1256701	1256800	0.5	1	0.5	0.5	1	1	1
Bhaga_1	1257401	1257500	0.5	1	1	0.5	1	1	0.5
Bhaga_1	1260101	1260200	1	0.5	1	0.5	1	0.5	1
Bhaga_1	1260201	1260300	1	1	1	0.5	0.5	0.5	1
Bhaga_1	1262101	1262200	0.5	0.5	0.5	0.5	0	0	0
Bhaga_1	1262201	1262300	0.5	0.5	1	1	0.5	1	0.5
Bhaga_1	1262401	1262500	0.5	0.5	0.5	0	0	0	0.5
Bhaga_1	1262501	1262600	0.5	0.5	0.5	0	0	0	0.5
Bhaga_1	1262601	1262700	0.5	0.5	0.5	0	0	0	0.5
Bhaga_1	1263601	1263700	0	0	0.5	0.5	0.5	0.5	0
Bhaga_1	1268901	1269000	1	0.5	0.5	1	0.5	1	1
Bhaga_1	1276801	1276900	0	0	0.5	0.5	0.5	0.5	0
Bhaga_1	1292401	1292500	0.5	1	1	1	0.5	1	0.5
Bhaga_1	1292601	1292700	0.5	1	0.5	1	0.5	1	0.5
Bhaga_1	1294601	1294700	0.5	1	1	1	1	0.5	0.5
Bhaga_1	1294901	1295000	0.5	1	0.5	0.5	1	1	0.5
Bhaga_1	1298901	1299000	0.5	0.5	0.5	0	0	0	0.5
Bhaga_1	1299001	1299100	0	0.5	0.5	0	0	0	0.5
Bhaga_1	1301101	1301200	0.5	1	1	0.5	1	0.5	0.5
Bhaga_1	1302501	1302600	0.5	1	0.5	1	1	1	0.5
Bhaga_1	1311901	1312000	0.5	0.5	0.5	0	0	0	0.5
Bhaga_1	1312001	1312100	0.5	0.5	0.5	0	0	0	0.5
Bhaga_1	1315401	1315500	0.5	0	0	0.5	0.5	0	0.5
Bhaga_1	1334901	1335000	0.5	1	0.5	1	0.5	1	1
Bhaga_1	1343801	1343900	0	0.5	0.5	0.5	0	0.5	0
Bhaga_1	1361301	1361400	0.5	0.5	1	1	0.5	0.5	1
Bhaga_1	1361401	1361500	0.5	0.5	1	1	0.5	0.5	1
Bhaga_1	1366301	1366400	0.5	0	0	0	0.5	0.5	0
Bhaga_1	1367701	1367800	0.5	0.5	0.5	0.5	1	1	1
Bhaga_1	1368001	1368100	0	0.5	0	0.5	0	0.5	0
Bhaga_1	1378401	1378500	0.5	0.5	0.5	0	0	0.5	0
Bhaga_1	1382601	1382700	1	0.5	0.5	1	1	0.5	0.5
Bhaga_1	1383301	1383400	0.5	1	0.5	1	1	0.5	0.5
Bhaga_1	1388101	1388200	0	0.5	0	0.5	0.5	0	0
Bhaga_1	1428001	1428100	0.5	0.5	0.5	0	0	0	0.5
Bhaga_1	1428601	1428700	0.5	0	0.5	0	0.5	0.5	0
Bhaga_1	1435301	1435400	1	0.5	0.5	1	1	1	0.5
Bhaga_1	1437401	1437500	1	1	0.5	1	1	0.5	0.5
Bhaga_1	1440001	1440100	1	0.5	0.5	1	0.5	1	0.5
Bhaga_1	1449701	1449800	1	0.5	0.5	0.5	1	1	1
Bhaga_1	1465901	1466000	0.5	1	0.5	1	0.5	0.5	1
Bhaga_1	1467601	1467700	0.5	0	0	0	0.5	0	0.5
Bhaga_1	1478001	1478100	0.5	0	0.5	0	0	0.5	0
Bhaga_1	1496801	1496900	0.5	1	0.5	1	0.5	1	0.5
Bhaga_1	1502101	1502200	0.5	1	0.5	0.5	1	1	0.5
Bhaga_1	1509801	1509900	1	0.5	0.5	1	0.5	1	0.5
Bhaga_1	1511501	1511600	0.5	1	1	0.5	0.5	1	1
Bhaga_1	1511901	1512000	1	1	0.5	0.5	0.5	0.5	1
Bhaga_1	1515801	1515900	1	1	0.5	0.5	0.5	0.5	1
Bhaga_1	1516401	1516500	0.5	1	1	0.5	0.5	1	0.5
Bhaga_1	1516701	1516800	0.5	0	0	0.5	0	0.5	0
Bhaga_1	1519501	1519600	0.5	0.5	1	0.5	1	0.5	1
Bhaga_1	1530001	1530100	0.5	0.5	1	1	0.5	1	0.5
Bhaga_1	1531901	1532000	1	0.5	0.5	1	0.5	1	0.5
Bhaga_1	1532401	1532500	0.5	0.5	1	0.5	1	1	1
Bhaga_1	1539801	1539900	0.5	0	0	0	0	0.5	0.5
Bhaga_1	1542401	1542500	0.5	1	0.5	0.5	1	0.5	1
Bhaga_1	1542601	1542700	0.5	1	0.5	0.5	1	1	1
Bhaga_1	1544101	1544200	1	0.5	0.5	1	1	0.5	1
Bhaga_1	1545001	1545100	1	1	0.5	1	0.5	0.5	0.5
Bhaga_1	1545701	1545800	1	1	0.5	0.5	0.5	1	0.5
Bhaga_1	1545801	1545900	1	1	0.5	0.5	0.5	1	0.5
Bhaga_1	1549501	1549600	0	0	0.5	0.5	0	0	0.5
Bhaga_1	1565201	1565300	0.5	0.5	1	1	0.5	1	1
Bhaga_1	1571101	1571200	1	0.5	0.5	0.5	1	1	0.5
Bhaga_1	1584601	1584700	0.5	0.5	0.5	1	1	1	0.5
Bhaga_1	1588801	1588900	0.5	0.5	0.5	0.5	0	0	0
Bhaga_1	1597601	1597700	0	0.5	0	0.5	0.5	0	0
Bhaga_1	1605901	1606000	1	1	1	0.5	0.5	0.5	1
Bhaga_1	1607301	1607400	1	1	1	1	0.5	0.5	0.5
Bhaga_1	1608301	1608400	0.5	1	1	1	0.5	0.5	1
Bhaga_1	1608601	1608700	0.5	1	1	0.5	0.5	1	0.5
Bhaga_1	1608801	1608900	0.5	0.5	0	0	0	0	0.5
Bhaga_1	1615601	1615700	0.5	1	0.5	0.5	1	0.5	1
Bhaga_1	1620801	1620900	1	0.5	0.5	1	0.5	1	1
Bhaga_1	1622201	1622300	0.5	0.5	1	0.5	1	1	0.5
Bhaga_1	1627701	1627800	0	0	0.5	0.5	0	0	0.5
Bhaga_1	1635601	1635700	1	0.5	0.5	0.5	1	0.5	1
Bhaga_1	1638101	1638200	0	0	0	0.5	0	0.5	0.5
Bhaga_1	1641501	1641600	0	0	0.5	0	0	0.5	0.5
Bhaga_1	1643301	1643400	0.5	0	0.5	0	0	0.5	0
Bhaga_1	1646101	1646200	0.5	1	0.5	1	0.5	0.5	1
Bhaga_1	1646201	1646300	0.5	1	0.5	1	0.5	0.5	1
Bhaga_1	1646301	1646400	0.5	1	0.5	1	0.5	0.5	1
Bhaga_1	1669601	1669700	0.5	1	1	0.5	0.5	1	1
Bhaga_1	1670001	1670100	1	1	0.5	1	0.5	1	0.5
Bhaga_1	1670201	1670300	0.5	1	0.5	1	0.5	1	1
Bhaga_1	1678101	1678200	0.5	1	0.5	1	0.5	1	1
Bhaga_1	1683101	1683200	0	0	0	0	0.5	0.5	0.5
Bhaga_1	1691101	1691200	1	1	0.5	0.5	1	0.5	0.5
Bhaga_1	1696401	1696500	0.5	0.5	0	0.5	0	0	0
Bhaga_1	1697201	1697300	0.5	0.5	0.5	0.5	0	0	0
Bhaga_1	1697301	1697400	0.5	0.5	0.5	0.5	0	0	0
Bhaga_1	1706001	1706100	0.5	1	1	1	0.5	0.5	0.5
Bhaga_1	1706101	1706200	0.5	1	1	1	1	0.5	0.5
Bhaga_1	1706901	1707000	0.5	0.5	0.5	0	0	0	0.5
Bhaga_1	1707101	1707200	0.5	0.5	0.5	0	0	0	0.5
Bhaga_1	1714601	1714700	1	1	0.5	1	0.5	0.5	0.5
Bhaga_1	1714701	1714800	1	1	0.5	1	1	0.5	0.5
Bhaga_1	1718901	1719000	1	1	0.5	0.5	0.5	1	0.5
Bhaga_1	1720401	1720500	0.5	1	1	0.5	1	0.5	1
Bhaga_1	1725501	1725600	0.5	0.5	1	1	1	0.5	1
Bhaga_1	1731701	1731800	0	0	0.5	0.5	0	0	0.5
Bhaga_1	1731801	1731900	0	0	0.5	0.5	0	0	0.5
Bhaga_1	1733901	1734000	0.5	1	0.5	0.5	1	1	1
Bhaga_1	1745001	1745100	0.5	1	1	1	0.5	1	0.5
Bhaga_1	1746001	1746100	0.5	1	0.5	1	0.5	1	0.5
Bhaga_1	1747601	1747700	0.5	1	0.5	0.5	0.5	1	1
Bhaga_1	1747901	1748000	0.5	0.5	0	0	0.5	0	0.5
Bhaga_1	1756801	1756900	0.5	1	1	1	1	0.5	0.5
Bhaga_1	1768801	1768900	0	0	0.5	0	0.5	0.5	0
Bhaga_1	1777901	1778000	0	0.5	0	0	0.5	0	0.5
Bhaga_1	1778101	1778200	0.5	0	0.5	0	0.5	0	0
Bhaga_1	1783501	1783600	1	1	0.5	0.5	1	1	0.5
Bhaga_1	1789501	1789600	0.5	0.5	0.5	0.5	1	1	1
Bhaga_1	1796501	1796600	0.5	1	0.5	1	1	0.5	1
Bhaga_1	1796601	1796700	0.5	1	0.5	1	1	0.5	1
Bhaga_1	1797901	1798000	0.5	1	0.5	1	1	0.5	0.5
Bhaga_1	1799901	1800000	0.5	1	1	1	0.5	1	0.5
Bhaga_1	1800001	1800100	0.5	0.5	1	1	0.5	1	1
Bhaga_1	1802101	1802200	0.5	0	0	0.5	0.5	0	0
Bhaga_1	1808401	1808500	1	0.5	0.5	1	1	0.5	0.5
Bhaga_1	1812101	1812200	1	1	0.5	0.5	1	1	0.5
Bhaga_1	1813201	1813300	0.5	1	0.5	0.5	1	1	1
Bhaga_1	1823501	1823600	1	0.5	0.5	1	0.5	1	0.5
Bhaga_1	1826701	1826800	0.5	0.5	0	0	0	0	0.5
Bhaga_1	1845501	1845600	1	0.5	0.5	1	1	0.5	1
Bhaga_1	1845601	1845700	1	0.5	0.5	1	1	0.5	1
Bhaga_1	1851801	1851900	0.5	1	0.5	0.5	1	1	0.5
Bhaga_1	1853601	1853700	1	0.5	1	0.5	0.5	1	0.5
Bhaga_1	1853701	1853800	1	0.5	1	0.5	0.5	1	0.5
Bhaga_1	1856301	1856400	0.5	1	0.5	1	0.5	1	0.5
Bhaga_1	1868101	1868200	0.5	0	0	0.5	0.5	0.5	0
Bhaga_1	1868201	1868300	0.5	0.5	0	0.5	0	0	0
Bhaga_1	1875901	1876000	0.5	1	0.5	1	0.5	0.5	1
Bhaga_1	1877601	1877700	1	0.5	1	1	1	0.5	0.5
Bhaga_1	1878501	1878600	0.5	0.5	0.5	0.5	1	1	1
Bhaga_1	1879401	1879500	1	0.5	1	0.5	0.5	0.5	1
Bhaga_1	1885001	1885100	1	0.5	1	1	1	0.5	0.5
Bhaga_1	1885601	1885700	1	0.5	0.5	1	1	0.5	1
Bhaga_1	1890801	1890900	0.5	0	0	0.5	0.5	0.5	0
Bhaga_1	1900301	1900400	0.5	0.5	0	0	0.5	0	0.5
Bhaga_1	1919501	1919600	1	1	0.5	0.5	1	1	0.5
Bhaga_1	1922601	1922700	1	1	1	0.5	0.5	0.5	1
Bhaga_1	1922801	1922900	1	1	0.5	1	0.5	1	0.5
Bhaga_1	1946901	1947000	0.5	1	0.5	1	1	1	0.5
Bhaga_1	1968601	1968700	0.5	0	0.5	0.5	0.5	0	0
Bhaga_1	1969601	1969700	1	1	1	1	0.5	0.5	0.5
Bhaga_1	1976201	1976300	0.5	0.5	0.5	1	1	1	0.5
Bhaga_1	1976301	1976400	0.5	0.5	0.5	1	1	1	0.5
Bhaga_1	1976401	1976500	0.5	0.5	0.5	1	1	1	0.5
Bhaga_1	1977401	1977500	0	0	0.5	0.5	0.5	0	0
Bhaga_1	1985501	1985600	0.5	1	0.5	1	1	0.5	1
Bhaga_1	1998801	1998900	1	1	0.5	1	1	0.5	0.5
Bhaga_1	1998901	1999000	1	0.5	0.5	1	1	0.5	0.5
Bhaga_1	2004101	2004200	1	1	0.5	1	0.5	1	0.5
Bhaga_1	2014801	2014900	1	0.5	1	1	1	0.5	0.5
Bhaga_1	2015501	2015600	0.5	0.5	1	0.5	1	0.5	1
Bhaga_1	2016501	2016600	1	0.5	1	1	1	0.5	0.5
Bhaga_1	2030601	2030700	1	0.5	1	0.5	0.5	1	0.5
Bhaga_1	2030701	2030800	0.5	1	0.5	0.5	0.5	1	1
Bhaga_1	2031901	2032000	0.5	1	0.5	1	0.5	1	1
Bhaga_1	2040301	2040400	1	1	0.5	0.5	1	0.5	0.5
Bhaga_1	2044301	2044400	0	0.5	0	0	0.5	0.5	0.5
Bhaga_1	2056301	2056400	1	1	0.5	0.5	1	0.5	0.5
Bhaga_1	2057701	2057800	0.5	0.5	1	1	0.5	1	1
Bhaga_1	2059901	2060000	0.5	1	1	1	0.5	0.5	1
Bhaga_1	2060701	2060800	1	0.5	0.5	0.5	0.5	1	1
Bhaga_1	2061401	2061500	1	1	0.5	1	0.5	0.5	1
Bhaga_1	2064201	2064300	1	0.5	1	1	0.5	0.5	1
Bhaga_1	2067001	2067100	0.5	1	0.5	1	1	0.5	0.5
Bhaga_1	2067201	2067300	0.5	0.5	1	1	1	0.5	1
Bhaga_1	2077401	2077500	0.5	0.5	1	0.5	1	1	1
Bhaga_1	2080901	2081000	0.5	0.5	1	0.5	1	1	1
Bhaga_1	2081001	2081100	0.5	0.5	1	0.5	1	1	1
Bhaga_1	2088501	2088600	1	0.5	0.5	1	1	0.5	0.5
Bhaga_1	2088901	2089000	0.5	0	0	0.5	0	0.5	0
Bhaga_1	2091001	2091100	0.5	0.5	0	0.5	0.5	0	0
Bhaga_1	2091901	2092000	0.5	1	1	1	1	0.5	0.5
Bhaga_1	2097601	2097700	1	0.5	0.5	0.5	1	0.5	1
Bhaga_1	2113701	2113800	1	1	0.5	0.5	1	0.5	1
Bhaga_1	2115301	2115400	1	1	0.5	0.5	0.5	1	0.5
Bhaga_1	2115601	2115700	0	0	0.5	0	0	0.5	0.5
Bhaga_1	2120101	2120200	0	0	0.5	0	0.5	0	0.5
Bhaga_1	2123401	2123500	1	1	0.5	0.5	0.5	1	0.5
Bhaga_1	2123501	2123600	1	1	0.5	0.5	0.5	1	0.5
Bhaga_1	2125201	2125300	1	0.5	0.5	1	0.5	0.5	1
Bhaga_1	2129701	2129800	0.5	0	0	0	0.5	0.5	0.5
Bhaga_1	2131401	2131500	0.5	0.5	0.5	0	0.5	0	0
Bhaga_1	2149201	2149300	0.5	1	1	0.5	0.5	1	0.5
Bhaga_1	2151001	2151100	0.5	0.5	0	0.5	0	0	0
Bhaga_1	2153701	2153800	0	0.5	0.5	0	0	0.5	0.5
Bhaga_1	2157101	2157200	0.5	0	0.5	0.5	0	0.5	0
Bhaga_1	2158601	2158700	1	0.5	1	0.5	0.5	1	1
Bhaga_1	2174601	2174700	1	0.5	0.5	1	0.5	1	1
Bhaga_1	2178601	2178700	0.5	0.5	1	1	1	0.5	0.5
Bhaga_1	2179001	2179100	0.5	0.5	0.5	1	0.5	1	1
Bhaga_1	2179301	2179400	1	0.5	1	1	1	0.5	0.5
Bhaga_1	2185201	2185300	0.5	1	1	0.5	0.5	0.5	1
Bhaga_1	2188901	2189000	1	0.5	0.5	1	0.5	0.5	1
Bhaga_1	2189301	2189400	0.5	0	0	0.5	0	0.5	0.5
Bhaga_1	2189901	2190000	1	0.5	1	1	1	0.5	0.5
Bhaga_1	2190001	2190100	1	0.5	1	1	1	0.5	0.5
Bhaga_1	2190601	2190700	0	0.5	0	0	0	0.5	0.5
Bhaga_1	2191801	2191900	1	0.5	1	1	0.5	0.5	0.5
Bhaga_1	2191901	2192000	1	0.5	1	1	1	0.5	0.5
Bhaga_1	2192601	2192700	1	1	0.5	1	0.5	0.5	0.5
Bhaga_1	2192701	2192800	1	1	0.5	1	0.5	1	0.5
Bhaga_1	2192801	2192900	1	1	0.5	1	0.5	0.5	0.5
Bhaga_1	2196901	2197000	0.5	0	0.5	0	0	0	0.5
Bhaga_1	2200701	2200800	1	0.5	1	0.5	1	0.5	1
Bhaga_1	2212401	2212500	0.5	1	1	0.5	1	1	0.5
Bhaga_1	2212501	2212600	0.5	1	1	0.5	1	1	0.5
Bhaga_1	2244001	2244100	0.5	0	0	0	0	0.5	0.5
Bhaga_1	2262501	2262600	1	1	0.5	0.5	1	0.5	0.5
Bhaga_1	2265301	2265400	0.5	0.5	0	0.5	0	0	0
Bhaga_1	2275301	2275400	0.5	1	1	1	0.5	0.5	1
Bhaga_1	2287201	2287300	0	0	0.5	0.5	0.5	0	0.5
Bhaga_1	2288001	2288100	1	0.5	0.5	0.5	1	1	0.5
Bhaga_1	2299301	2299400	0.5	1	1	1	0.5	1	0.5
Bhaga_1	2305601	2305700	0	0	0	0.5	0.5	0	0.5
Bhaga_1	2308801	2308900	0.5	0.5	1	1	0.5	1	1
Bhaga_1	2312101	2312200	1	0.5	0.5	1	1	0.5	0.5
Bhaga_1	2315501	2315600	0.5	0	0.5	0.5	0.5	0	0
Bhaga_1	2326601	2326700	0.5	0.5	0	0	0	0.5	0
Bhaga_1	2326701	2326800	0.5	0.5	0	0	0	0.5	0
Bhaga_1	2329301	2329400	0.5	0	0	0	0.5	0.5	0.5
Bhaga_1	2329401	2329500	0.5	0	0	0	0.5	0.5	0.5
Bhaga_1	2329501	2329600	0.5	0.5	0	0	0	0.5	0
Bhaga_1	2332001	2332100	0	0	0.5	0	0.5	0	0.5
Bhaga_1	2351601	2351700	0	0	0	0.5	0	0.5	0.5
Bhaga_1	2355501	2355600	1	0.5	1	1	0.5	0.5	1
Bhaga_1	2356701	2356800	0.5	0.5	1	0.5	0.5	1	1
Bhaga_1	2358701	2358800	1	1	1	0.5	0.5	0.5	0.5
Bhaga_1	2359401	2359500	0.5	0.5	1	1	0.5	0.5	1
Bhaga_1	2360101	2360200	0.5	0.5	1	1	0.5	1	0.5
Bhaga_1	2367901	2368000	0	0.5	0.5	0	0.5	0	0
Bhaga_1	2368901	2369000	0	0.5	0	0.5	0	0.5	0.5
Bhaga_1	2389101	2389200	0.5	1	0.5	1	0.5	1	0.5
Bhaga_1	2389301	2389400	0	0	0	0.5	0	0.5	0.5
Bhaga_1	2390901	2391000	1	1	1	0.5	0.5	0.5	1
Bhaga_1	2395301	2395400	0.5	0.5	0.5	1	1	1	0.5
Bhaga_1	2395601	2395700	0.5	1	1	0.5	0.5	1	1
Bhaga_1	2395801	2395900	0	0	0	0.5	0	0.5	0.5
Bhaga_1	2397501	2397600	1	1	1	0.5	0.5	0.5	0.5
Bhaga_1	2400501	2400600	0	0	0.5	0.5	0.5	0	0
Bhaga_1	2400801	2400900	0.5	1	1	0.5	0.5	1	0.5
Bhaga_1	2426301	2426400	0.5	0.5	0	0	0	0.5	0.5
Bhaga_1	2436001	2436100	1	0.5	1	1	1	0.5	0.5
Bhaga_1	2436301	2436400	1	0.5	0.5	1	0.5	1	0.5
Bhaga_1	2436701	2436800	0.5	0.5	0.5	1	1	1	0.5
Bhaga_1	2466401	2466500	0.5	1	1	0.5	1	0.5	1
Bhaga_1	2470101	2470200	0	0	0	0.5	0	0.5	0.5
Bhaga_1	2473701	2473800	0.5	1	1	1	0.5	0.5	0.5
Bhaga_1	2477801	2477900	0.5	0.5	1	1	1	0.5	0.5
Bhaga_1	2477901	2478000	0.5	0.5	1	1	1	0.5	0.5
Bhaga_1	2490901	2491000	1	1	0.5	0.5	1	0.5	1
Bhaga_1	2494101	2494200	1	1	1	1	0.5	0.5	0.5
Bhaga_1	2494201	2494300	1	0.5	1	1	0.5	0.5	0.5
Bhaga_1	2495701	2495800	1	1	0.5	0.5	1	0.5	0.5
Bhaga_1	2498501	2498600	0.5	0.5	0.5	0	0	0	0
Bhaga_1	2498601	2498700	0.5	0.5	0.5	0	0.5	0	0
Bhaga_1	2500801	2500900	0.5	1	0.5	1	1	1	0.5
Bhaga_1	2509001	2509100	1	0.5	0.5	1	1	0.5	0.5
Bhaga_1	2509301	2509400	1	0.5	0.5	1	1	1	0.5
Bhaga_1	2530001	2530100	0.5	1	0.5	0.5	1	1	0.5
Bhaga_1	2531301	2531400	1	0.5	1	0.5	1	0.5	1
Bhaga_1	2535701	2535800	1	1	0.5	0.5	1	0.5	1
Bhaga_1	2535801	2535900	1	1	0.5	0.5	0.5	1	1
Bhaga_1	2537701	2537800	1	0.5	0.5	0.5	1	1	1
Bhaga_1	2547801	2547900	0	0	0.5	0.5	0.5	0	0
Bhaga_1	2548301	2548400	0.5	1	1	0.5	1	1	0.5
Bhaga_1	2549701	2549800	1	0.5	0.5	1	1	0.5	1
Bhaga_1	2550101	2550200	0.5	0.5	0.5	1	1	1	1
Bhaga_1	2550401	2550500	1	1	0.5	0.5	0.5	1	1
Bhaga_1	2557501	2557600	0.5	1	1	0.5	0.5	0.5	1
Bhaga_1	2570701	2570800	0.5	0.5	0	0	0	0.5	0
Bhaga_1	2583601	2583700	0	0.5	0	0.5	0	0.5	0
Bhaga_1	2605701	2605800	0.5	0	0	0	0.5	0	0.5
Bhaga_1	2607301	2607400	1	0.5	1	0.5	1	1	0.5
Bhaga_1	2607701	2607800	1	1	0.5	0.5	1	0.5	1
Bhaga_1	2612101	2612200	0.5	0	0.5	0.5	0	0	0
Bhaga_1	2614101	2614200	0.5	1	0.5	1	1	0.5	1
Bhaga_1	2614401	2614500	1	0.5	0.5	0.5	1	1	0.5
Bhaga_1	2621401	2621500	0.5	0.5	1	0.5	1	0.5	1
Bhaga_1	2630901	2631000	0	0.5	0	0.5	0	0.5	0
Bhaga_1	2639001	2639100	0.5	1	0.5	1	1	0.5	0.5
Bhaga_1	2639101	2639200	0.5	1	0.5	1	1	0.5	0.5
Bhaga_1	2642901	2643000	0.5	1	1	1	0.5	1	0.5
Bhaga_1	2651101	2651200	0.5	0	0	0	0.5	0.5	0.5
Bhaga_1	2659401	2659500	1	0.5	0.5	1	1	0.5	0.5
Bhaga_1	2659501	2659600	1	0.5	0.5	0.5	1	0.5	1
Bhaga_1	2660101	2660200	1	0.5	0.5	1	1	1	0.5
Bhaga_1	2660601	2660700	1	1	0.5	0.5	1	0.5	1
Bhaga_1	2668001	2668100	0.5	1	0.5	1	0.5	0.5	1
Bhaga_1	2692101	2692200	0.5	1	1	0.5	0.5	0.5	1
Bhaga_1	2698701	2698800	1	1	1	0.5	1	0.5	0.5
Bhaga_1	2699401	2699500	1	1	0.5	1	1	0.5	0.5
Bhaga_1	2710101	2710200	0.5	0.5	1	1	1	0.5	0.5
Bhaga_1	2710201	2710300	0.5	0.5	1	1	1	0.5	0.5
Bhaga_1	2719601	2719700	1	1	1	0.5	0.5	0.5	0.5
Bhaga_1	2722001	2722100	1	1	1	0.5	0.5	1	0.5
Bhaga_1	2726201	2726300	0.5	0.5	1	1	1	1	0.5
Bhaga_1	2727201	2727300	1	1	0.5	1	0.5	0.5	0.5
Bhaga_1	2727301	2727400	0.5	1	0.5	1	0.5	0.5	1
Bhaga_1	2728301	2728400	1	0.5	1	1	1	0.5	0.5
Bhaga_1	2729601	2729700	1	1	0.5	0.5	1	0.5	0.5
Bhaga_1	2738601	2738700	0.5	1	0.5	0.5	1	0.5	1
Bhaga_1	2740401	2740500	0.5	0	0.5	0	0.5	0.5	0
Bhaga_1	2744801	2744900	1	1	0.5	0.5	0.5	1	1
Bhaga_1	2745901	2746000	0.5	0	0.5	0	0	0.5	0
Bhaga_1	2749601	2749700	1	1	0.5	1	1	0.5	0.5
Bhaga_1	2754501	2754600	1	1	1	1	0.5	0.5	0.5
Bhaga_1	2756301	2756400	0	0	0.5	0	0.5	0.5	0.5
Bhaga_1	2759601	2759700	0.5	0.5	1	0.5	1	0.5	1
Bhaga_1	2761001	2761100	1	1	0.5	1	0.5	1	0.5
Bhaga_1	2762801	2762900	1	0.5	1	0.5	1	1	0.5
Bhaga_1	2765201	2765300	0.5	0.5	0.5	1	1	1	0.5
Bhaga_1	2767401	2767500	1	1	1	0.5	0.5	0.5	1
Bhaga_1	2779701	2779800	0.5	0.5	0.5	1	1	1	0.5
Bhaga_1	2781201	2781300	1	0.5	1	1	0.5	0.5	1
Bhaga_1	2783301	2783400	1	0.5	1	1	0.5	0.5	0.5
Bhaga_1	2783601	2783700	0.5	0	0.5	0.5	0	0	0
Bhaga_1	2784901	2785000	0.5	0.5	1	1	0.5	0.5	1
Bhaga_1	2785501	2785600	0.5	1	0.5	0.5	0.5	1	1
Bhaga_1	2786001	2786100	1	0.5	1	1	0.5	0.5	1
Bhaga_1	2796601	2796700	0.5	1	0.5	0.5	1	0.5	1
Bhaga_1	2799801	2799900	1	0.5	1	1	1	0.5	0.5
Bhaga_1	2802901	2803000	1	1	0.5	1	0.5	0.5	1
Bhaga_1	2808201	2808300	1	0.5	1	0.5	0.5	1	0.5
Bhaga_1	2811301	2811400	1	0.5	1	0.5	1	1	0.5
Bhaga_1	2811401	2811500	1	0.5	1	0.5	1	1	0.5
Bhaga_1	2811701	2811800	1	0.5	1	1	0.5	0.5	0.5
Bhaga_1	2839401	2839500	0.5	0.5	0.5	1	0.5	1	1
Bhaga_1	2839501	2839600	0.5	0.5	1	1	0.5	1	1
Bhaga_1	2839601	2839700	0.5	0.5	1	1	0.5	1	1
Bhaga_1	2850201	2850300	0.5	0.5	1	1	0.5	0.5	1
Bhaga_1	2852701	2852800	0.5	0	0.5	0.5	0	0	0
Bhaga_1	2854401	2854500	0.5	0.5	1	0.5	0.5	1	1
Bhaga_1	2856701	2856800	0.5	0.5	1	1	1	0.5	1
Bhaga_1	2862301	2862400	0.5	0	0	0.5	0	0.5	0
Bhaga_1	2864401	2864500	0.5	1	0.5	1	1	0.5	1
Bhaga_1	2864701	2864800	0.5	0.5	0.5	0.5	1	1	1
Bhaga_1	2882001	2882100	0.5	0.5	0.5	0	0	0	0
Bhaga_1	2883901	2884000	0.5	1	0.5	0.5	1	1	1
Bhaga_1	2884101	2884200	0.5	0.5	0.5	1	0.5	1	1
Bhaga_1	2892101	2892200	1	1	1	1	0.5	0.5	0.5
Bhaga_1	2905901	2906000	0	0.5	0	0.5	0	0.5	0.5
Bhaga_1	2912701	2912800	0.5	1	0.5	1	0.5	1	1
Bhaga_1	2913501	2913600	1	0.5	0.5	1	0.5	0.5	1
Bhaga_1	2913601	2913700	1	0.5	0.5	1	0.5	1	1
Bhaga_1	2918101	2918200	0.5	0.5	0.5	1	1	0.5	1
Bhaga_1	2920401	2920500	0.5	0.5	0.5	1	1	1	1
Bhaga_1	2920501	2920600	0.5	0.5	1	0.5	1	1	1
Bhaga_1	2925801	2925900	0.5	0	0	0.5	0	0.5	0.5
Bhaga_1	2932401	2932500	1	1	0.5	0.5	1	0.5	0.5
Bhaga_1	2935101	2935200	0.5	0.5	0.5	1	1	1	1
Bhaga_1	2935201	2935300	0.5	0.5	0.5	1	0.5	1	1
Bhaga_1	2935801	2935900	1	1	0.5	0.5	1	0.5	1
Bhaga_1	2939301	2939400	0.5	0	0	0.5	0.5	0	0
Bhaga_1	2943601	2943700	1	1	0.5	1	0.5	1	0.5
Bhaga_1	2943901	2944000	0.5	1	0.5	1	0.5	0.5	1
Bhaga_1	2967301	2967400	0.5	1	0.5	1	0.5	1	0.5
Bhaga_1	2988701	2988800	0.5	0	0.5	0.5	0	0.5	0
Bhaga_1	2997001	2997100	0	0.5	0.5	0.5	0	0.5	0
Bhaga_1	3005701	3005800	0.5	1	0.5	1	1	0.5	0.5
Bhaga_1	3006001	3006100	0	0.5	0	0.5	0	0.5	0
Bhaga_1	3013201	3013300	0	0	0	0	0.5	0.5	0.5
Bhaga_1	3013301	3013400	0	0	0	0	0.5	0.5	0.5
Bhaga_1	3017401	3017500	0.5	1	0.5	0.5	1	1	1
Bhaga_1	3028501	3028600	0.5	1	1	1	1	0.5	0.5
Bhaga_1	3033501	3033600	0	0	0.5	0	0.5	0	0.5
Bhaga_1	3034901	3035000	1	0.5	1	0.5	1	0.5	1
Bhaga_1	3040101	3040200	1	0.5	1	1	1	0.5	0.5
Bhaga_1	3089901	3090000	1	1	1	0.5	0.5	0.5	1
Bhaga_1	3102201	3102300	1	0.5	0.5	1	0.5	1	1
Bhaga_1	3116801	3116900	1	1	0.5	1	1	0.5	0.5
Bhaga_1	3118301	3118400	0.5	0.5	0	0	0	0.5	0.5
Bhaga_1	3119601	3119700	1	0.5	0.5	1	0.5	1	0.5
Bhaga_1	3131801	3131900	1	0.5	0.5	0.5	0.5	1	1
Bhaga_1	3137201	3137300	1	1	0.5	1	0.5	0.5	1
Bhaga_1	3161001	3161100	0.5	0.5	0	0	0.5	0	0
Bhaga_1	3163101	3163200	0.5	0.5	1	1	1	0.5	0.5
Bhaga_1	3177701	3177800	1	0.5	1	1	0.5	1	0.5
Bhaga_1	3179201	3179300	0.5	1	0.5	1	1	0.5	1
Bhaga_1	3189201	3189300	1	1	0.5	0.5	1	0.5	1
Bhaga_1	3189801	3189900	0.5	0.5	0	0.5	0	0.5	0
Bhaga_1	3192501	3192600	0.5	1	0.5	1	1	0.5	1
Bhaga_1	3193401	3193500	1	0.5	0.5	1	1	0.5	0.5
Bhaga_1	3196901	3197000	0	0	0	0.5	0	0.5	0.5
Bhaga_1	3200501	3200600	0.5	0	0.5	0	0.5	0.5	0
Bhaga_1	3210601	3210700	0.5	0.5	1	1	0.5	0.5	1
Bhaga_1	3214601	3214700	1	0.5	1	1	1	0.5	0.5
Bhaga_1	3214701	3214800	1	0.5	0.5	1	0.5	0.5	1
Bhaga_1	3216601	3216700	0	0	0.5	0.5	0	0	0.5
Bhaga_1	3224001	3224100	0	0.5	0	0.5	0.5	0.5	0
Bhaga_1	3228101	3228200	1	1	1	0.5	1	0.5	0.5
Bhaga_1	3239501	3239600	0.5	1	0.5	1	1	0.5	1
Bhaga_1	3239801	3239900	1	0.5	0.5	1	1	0.5	1
Bhaga_1	3242101	3242200	0.5	1	1	0.5	0.5	1	1
Bhaga_1	3242801	3242900	0.5	1	0.5	1	0.5	1	1
Bhaga_1	3242901	3243000	1	0.5	1	1	1	0.5	0.5
Bhaga_1	3284001	3284100	1	0.5	1	1	1	0.5	0.5
Bhaga_1	3284301	3284400	0.5	1	1	0.5	1	1	0.5
Bhaga_1	3298201	3298300	0.5	0	0.5	0.5	0	0.5	0
Bhaga_1	3304501	3304600	0	0.5	0	0.5	0.5	0	0.5
Bhaga_1	3328101	3328200	0	0.5	0.5	0	0.5	0	0.5
Bhaga_1	3329601	3329700	1	0.5	1	1	1	0.5	0.5
Bhaga_1	3342201	3342300	0.5	0.5	0.5	1	0.5	1	1
Bhaga_1	3344401	3344500	0.5	1	1	0.5	1	0.5	0.5
Bhaga_1	3346401	3346500	0.5	1	0.5	0.5	1	1	1
Bhaga_1	3359001	3359100	0	0.5	0.5	0	0.5	0	0
Bhaga_1	3365301	3365400	1	0.5	0.5	1	1	0.5	1
Bhaga_1	3365401	3365500	1	1	0.5	1	0.5	0.5	1
Bhaga_1	3365501	3365600	1	1	0.5	1	0.5	0.5	1
Bhaga_1	3375201	3375300	0.5	0.5	0.5	1	1	1	0.5
Bhaga_1	3387501	3387600	0	0.5	0.5	0	0	0.5	0
Bhaga_1	3401801	3401900	1	1	0.5	0.5	0.5	0.5	1
Bhaga_1	3401901	3402000	0.5	1	1	1	0.5	0.5	1
Bhaga_1	3402001	3402100	0.5	1	1	1	0.5	0.5	0.5
Bhaga_1	3402201	3402300	1	0.5	0.5	0.5	1	0.5	1
Bhaga_1	3408701	3408800	1	1	0.5	0.5	0.5	1	1
Bhaga_1	3426001	3426100	0.5	0	0	0	0.5	0.5	0
Bhaga_1	3451101	3451200	1	1	0.5	1	1	0.5	0.5
Bhaga_1	3451201	3451300	1	0.5	0.5	1	0.5	1	0.5
Bhaga_1	3471101	3471200	0	0	0.5	0.5	0	0	0.5
Bhaga_1	3498701	3498800	0.5	0.5	1	1	1	1	0.5
Bhaga_1	3520101	3520200	0.5	0.5	1	1	0.5	1	0.5
Bhaga_1	3522701	3522800	1	1	0.5	0.5	1	0.5	0.5
Bhaga_1	3532401	3532500	0.5	0.5	1	1	1	1	0.5
Bhaga_1	3534201	3534300	1	1	0.5	1	0.5	0.5	0.5
Bhaga_1	3534701	3534800	0.5	0.5	0.5	0.5	1	1	1
Bhaga_1	3566401	3566500	0.5	0.5	0	0.5	0	0	0.5
Bhaga_1	3571501	3571600	0.5	1	1	1	0.5	1	0.5
Bhaga_1	3572401	3572500	1	1	1	0.5	0.5	0.5	1
Bhaga_1	3572601	3572700	0.5	1	1	0.5	1	0.5	1
Bhaga_1	3578201	3578300	1	1	1	1	0.5	0.5	0.5
Bhaga_1	3585501	3585600	1	0.5	1	0.5	1	1	0.5
Bhaga_1	3606601	3606700	0.5	1	1	1	0.5	0.5	0.5
Bhaga_1	3606901	3607000	0.5	0.5	0	0	0.5	0	0.5
Bhaga_1	3621501	3621600	1	1	0.5	1	0.5	0.5	1
Bhaga_1	3626501	3626600	1	0.5	0.5	0.5	1	0.5	1
Bhaga_1	3626601	3626700	1	0.5	0.5	0.5	1	0.5	1
Bhaga_1	3626701	3626800	1	0.5	0.5	0.5	1	0.5	1
Bhaga_1	3626901	3627000	0.5	1	0.5	1	1	0.5	0.5
Bhaga_1	3627001	3627100	0.5	1	0.5	1	1	0.5	0.5
Bhaga_1	3627101	3627200	0.5	1	0.5	1	1	0.5	0.5
Bhaga_1	3627201	3627300	0.5	1	0.5	1	1	0.5	1
Bhaga_1	3628501	3628600	0.5	0.5	0	0	0	0.5	0.5
Bhaga_1	3628601	3628700	0.5	0.5	1	1	0.5	0.5	1
Bhaga_1	3634601	3634700	1	0.5	1	0.5	1	0.5	1
Bhaga_1	3647601	3647700	1	0.5	0.5	0.5	0.5	1	1
Bhaga_1	3652501	3652600	1	1	1	1	0.5	0.5	0.5
Bhaga_1	3653301	3653400	1	1	0.5	0.5	1	0.5	1
Bhaga_1	3658701	3658800	0.5	0	0	0	0.5	0	0.5
Bhaga_1	3661801	3661900	0.5	0.5	1	1	1	0.5	1
Bhaga_1	3675801	3675900	0	0.5	0	0.5	0	0.5	0.5
Bhaga_1	3691601	3691700	1	0.5	1	0.5	1	0.5	0.5
Bhaga_1	3692501	3692600	1	0.5	1	1	0.5	0.5	0.5
Bhaga_1	3704001	3704100	0.5	0.5	0.5	0	0.5	0	0
Bhaga_1	3710601	3710700	0	0	0	0.5	0	0.5	0.5
Bhaga_1	3718701	3718800	0.5	1	0.5	0.5	1	0.5	1
Bhaga_1	3723801	3723900	0.5	1	0.5	1	0.5	1	1
Bhaga_1	3724201	3724300	1	1	0.5	0.5	1	0.5	0.5
Bhaga_1	3725501	3725600	1	1	0.5	1	0.5	0.5	0.5
Bhaga_1	3725601	3725700	1	1	0.5	1	0.5	0.5	1
Bhaga_1	3740801	3740900	0.5	1	1	0.5	1	0.5	0.5
Bhaga_1	3741301	3741400	1	0.5	1	0.5	0.5	0.5	1
Bhaga_1	3751701	3751800	1	1	0.5	0.5	1	1	0.5
Bhaga_1	3752801	3752900	1	0.5	1	1	1	0.5	0.5
Bhaga_1	3754301	3754400	0.5	1	1	0.5	0.5	0.5	1
Bhaga_1	3754401	3754500	0.5	1	1	0.5	0.5	1	1
Bhaga_1	3760001	3760100	0.5	0.5	0.5	1	1	1	0.5
Bhaga_1	3760101	3760200	0.5	0.5	0.5	1	1	1	0.5
Bhaga_1	3760201	3760300	0.5	0.5	0.5	1	1	1	0.5
Bhaga_1	3772201	3772300	0	0	0	0.5	0.5	0	0.5
Bhaga_1	3777701	3777800	1	1	1	0.5	0.5	0.5	1
Bhaga_1	3792901	3793000	0.5	1	0.5	0.5	1	0.5	1
Bhaga_1	3793001	3793100	1	1	0.5	0.5	1	0.5	1
Bhaga_1	3793101	3793200	0.5	1	1	0.5	0.5	1	1
Bhaga_1	3793801	3793900	0	0	0	0.5	0	0.5	0.5
Bhaga_1	3800901	3801000	1	0.5	0.5	1	1	0.5	0.5
Bhaga_1	3821601	3821700	0.5	1	0.5	1	0.5	0.5	1
Bhaga_1	3843901	3844000	0.5	0.5	0.5	1	1	1	0.5
Bhaga_1	3850801	3850900	0	0.5	0.5	0.5	0	0.5	0
Bhaga_1	3850901	3851000	0	0.5	0.5	0.5	0	0	0
Bhaga_1	3854401	3854500	0.5	1	0.5	0.5	0.5	1	1
Bhaga_1	3854501	3854600	0.5	1	0.5	0.5	0.5	1	1
Bhaga_1	3855501	3855600	0.5	0.5	0	0	0.5	0.5	0
Bhaga_1	3857801	3857900	0.5	0.5	0.5	0	0	0.5	0
Bhaga_1	3859101	3859200	0	0.5	0	0.5	0.5	0.5	0
Bhaga_1	3862201	3862300	0.5	1	1	1	0.5	1	0.5
Bhaga_1	3867401	3867500	0.5	0	0	0.5	0	0	0.5
Bhaga_1	3867601	3867700	0.5	1	0.5	1	1	0.5	0.5
Bhaga_1	3870801	3870900	0	0.5	0.5	0.5	0.5	0	0
Bhaga_1	3870901	3871000	0	0	0.5	0.5	0.5	0	0
Bhaga_1	3871001	3871100	0	0.5	0.5	0.5	0.5	0	0
Bhaga_1	3872101	3872200	0.5	0.5	0	0	0	0.5	0.5
Bhaga_1	3872701	3872800	0.5	1	1	0.5	0.5	1	1
Bhaga_1	3880401	3880500	0.5	1	0.5	0.5	1	1	0.5
Bhaga_1	3913801	3913900	0.5	0.5	0.5	0	0	0.5	0
Bhaga_1	3921301	3921400	0.5	0.5	1	1	1	0.5	0.5
Bhaga_1	3922001	3922100	1	0.5	0.5	1	1	1	0.5
Bhaga_1	3923601	3923700	1	0.5	1	0.5	1	1	0.5
Bhaga_1	3936101	3936200	0.5	1	0.5	0.5	1	1	0.5
Bhaga_1	3936901	3937000	0.5	0.5	0.5	1	1	1	0.5
Bhaga_1	3939601	3939700	0	0	0	0.5	0	0.5	0.5
Bhaga_1	3941201	3941300	1	1	1	0.5	1	0.5	0.5
Bhaga_1	3943701	3943800	1	0.5	1	0.5	1	0.5	0.5
Bhaga_1	3951701	3951800	0.5	0.5	0.5	1	1	1	1
Bhaga_1	3951801	3951900	0.5	0.5	0.5	1	1	1	1
Bhaga_1	3966101	3966200	0.5	0	0	0.5	0.5	0	0
Bhaga_1	3967101	3967200	0.5	0	0	0.5	0	0.5	0
Bhaga_1	3968001	3968100	0	0.5	0	0.5	0.5	0	0
Bhaga_1	3968901	3969000	1	1	1	0.5	1	0.5	0.5
Bhaga_1	3969001	3969100	0.5	1	1	0.5	1	0.5	1
Bhaga_1	3972101	3972200	0.5	1	1	1	0.5	1	0.5
Bhaga_1	3973401	3973500	1	0.5	1	0.5	1	0.5	0.5
Bhaga_1	3997401	3997500	0.5	0	0.5	0	0	0.5	0.5
Bhaga_1	4004801	4004900	0.5	0	0.5	0.5	0	0	0.5
Bhaga_1	4005501	4005600	0.5	0.5	0	0	0.5	0.5	0
Bhaga_1	4011701	4011800	0.5	0.5	1	1	0.5	0.5	1
Bhaga_1	4011801	4011900	0.5	0.5	1	1	0.5	0.5	1
Bhaga_1	4013001	4013100	1	1	1	0.5	0.5	1	0.5
Bhaga_1	4013301	4013400	1	1	0.5	1	0.5	1	0.5
Bhaga_1	4018801	4018900	1	1	0.5	1	0.5	0.5	1
Bhaga_1	4019401	4019500	1	0.5	1	1	0.5	0.5	0.5
Bhaga_1	4020001	4020100	0	0	0	0.5	0.5	0	0.5
Bhaga_1	4024201	4024300	0.5	0.5	0	0	0.5	0	0.5
Bhaga_1	4028701	4028800	0.5	0.5	1	1	1	0.5	0.5
Bhaga_1	4032001	4032100	1	0.5	0.5	1	0.5	0.5	1
Bhaga_1	4033101	4033200	0.5	0	0	0	0.5	0	0.5
Bhaga_1	4044101	4044200	0.5	1	1	0.5	1	1	0.5
Bhaga_1	4046701	4046800	0.5	0	0	0.5	0	0	0.5
Bhaga_1	4048601	4048700	0.5	0.5	1	0.5	0.5	1	1
Bhaga_1	4048701	4048800	0.5	1	0.5	0.5	1	1	1
Bhaga_1	4052201	4052300	0.5	0.5	0.5	1	0.5	1	1
Bhaga_1	4052401	4052500	1	0.5	0.5	1	0.5	0.5	1
Bhaga_1	4054401	4054500	0.5	1	1	0.5	1	0.5	0.5
Bhaga_1	4069701	4069800	0	0.5	0.5	0.5	0.5	0	0
Bhaga_1	4075101	4075200	1	1	0.5	1	0.5	1	0.5
Bhaga_1	4080701	4080800	1	0.5	0.5	1	0.5	1	0.5
Bhaga_1	4080801	4080900	1	0.5	0.5	1	0.5	1	0.5
Bhaga_1	4084501	4084600	1	0.5	0.5	1	1	0.5	1
Bhaga_1	4087901	4088000	1	0.5	0.5	1	0.5	1	1
Bhaga_1	4103401	4103500	0.5	1	1	0.5	0.5	1	0.5
Bhaga_1	4103601	4103700	0	0.5	0	0	0.5	0.5	0
Bhaga_1	4103701	4103800	0	0	0	0.5	0	0.5	0.5
Bhaga_1	4113401	4113500	0	0	0.5	0	0	0.5	0.5
Bhaga_1	4113501	4113600	0	0.5	0	0.5	0	0.5	0
Bhaga_1	4132701	4132800	1	0.5	1	1	0.5	0.5	0.5
Bhaga_1	4136601	4136700	0.5	0	0.5	0.5	0	0	0.5
Bhaga_1	4168301	4168400	0.5	1	1	1	1	0.5	0.5
Bhaga_1	4168401	4168500	0.5	1	1	1	1	0.5	0.5
Bhaga_1	4168901	4169000	1	0.5	1	0.5	1	0.5	1
Bhaga_1	4173601	4173700	0.5	1	1	0.5	0.5	1	0.5
Bhaga_1	4175701	4175800	0.5	0.5	1	0.5	1	0.5	1
Bhaga_1	4193301	4193400	0.5	0.5	0.5	0.5	1	1	1
Bhaga_1	4193601	4193700	0.5	1	0.5	1	0.5	1	0.5
Bhaga_1	4198601	4198700	0.5	0.5	1	0.5	0.5	1	1
Bhaga_1	4207101	4207200	1	1	0.5	1	1	0.5	0.5
Bhaga_1	4208601	4208700	1	1	0.5	1	1	0.5	0.5
Bhaga_1	4229101	4229200	0.5	1	1	1	0.5	0.5	1
Bhaga_1	4242301	4242400	1	0.5	0.5	1	1	1	0.5
Bhaga_1	4243701	4243800	0.5	1	0.5	1	1	1	0.5
Bhaga_1	4243901	4244000	1	0.5	0.5	1	0.5	0.5	1
Bhaga_1	4252601	4252700	0	0	0	0.5	0	0.5	0.5
Bhaga_1	4253801	4253900	0	0.5	0.5	0.5	0	0	0.5
Bhaga_1	4258201	4258300	0.5	0.5	1	1	0.5	0.5	1
Bhaga_1	4269801	4269900	0.5	0	0	0.5	0	0	0.5
Bhaga_1	4270301	4270400	0.5	0	0	0	0.5	0.5	0.5
Bhaga_1	4271601	4271700	0.5	0	0.5	0	0	0.5	0
Bhaga_1	4307901	4308000	1	1	0.5	1	0.5	1	0.5
Bhaga_1	4308101	4308200	1	0.5	1	0.5	0.5	0.5	1
Bhaga_1	4318801	4318900	0.5	0.5	0	0	0	0	0.5
Bhaga_1	4321901	4322000	0.5	0	0.5	0	0	0.5	0
Bhaga_1	4332801	4332900	0	0.5	0	0.5	0	0	0.5
Bhaga_1	4338501	4338600	0.5	0.5	0	0	0	0.5	0.5
Bhaga_1	4339001	4339100	1	1	1	0.5	0.5	1	0.5
Bhaga_1	4339101	4339200	1	1	1	0.5	0.5	0.5	0.5
Bhaga_1	4339201	4339300	1	1	1	0.5	0.5	0.5	0.5
Bhaga_1	4353601	4353700	0.5	1	0.5	0.5	1	1	0.5
Bhaga_1	4354601	4354700	0.5	0.5	0.5	0	0.5	0	0
Bhaga_1	4356401	4356500	0.5	1	0.5	1	0.5	1	1
Bhaga_1	4365001	4365100	1	1	1	1	0.5	0.5	0.5
Bhaga_1	4365101	4365200	1	1	1	1	0.5	0.5	0.5
Bhaga_1	4367901	4368000	0	0.5	0	0.5	0	0	0.5
Bhaga_1	4371101	4371200	0.5	1	1	0.5	0.5	1	0.5
Bhaga_1	4373301	4373400	0.5	1	1	1	1	0.5	0.5
Bhaga_1	4377501	4377600	0.5	1	0.5	1	1	0.5	0.5
Bhaga_1	4380601	4380700	0.5	0.5	0	0	0	0	0.5
Bhaga_1	4384201	4384300	1	0.5	1	0.5	0.5	1	0.5
Bhaga_1	4385001	4385100	1	0.5	0.5	1	0.5	1	0.5
Bhaga_1	4388501	4388600	0.5	1	1	0.5	0.5	1	1
Bhaga_1	4391501	4391600	1	1	0.5	1	0.5	0.5	1
Bhaga_1	4391601	4391700	1	1	0.5	1	0.5	0.5	1
Bhaga_1	4400201	4400300	1	1	0.5	0.5	1	0.5	1
Bhaga_1	4400301	4400400	0.5	1	0.5	0.5	1	0.5	1
Bhaga_1	4407401	4407500	1	0.5	0.5	1	0.5	1	0.5
Bhaga_1	4409701	4409800	0.5	1	0.5	1	1	1	0.5
Bhaga_1	4421301	4421400	0.5	0.5	0.5	0.5	1	1	1
Bhaga_1	4421401	4421500	0.5	0.5	0.5	0.5	1	1	1
Bhaga_1	4421601	4421700	0.5	0.5	1	1	1	0.5	0.5
Bhaga_1	4425101	4425200	1	0.5	0.5	1	1	1	0.5
Bhaga_1	4425501	4425600	1	1	0.5	0.5	0.5	0.5	1
Bhaga_1	4438701	4438800	1	0.5	1	0.5	1	1	0.5
Bhaga_1	4457401	4457500	1	0.5	1	0.5	1	1	0.5
Bhaga_1	4457501	4457600	1	1	0.5	1	1	0.5	0.5
Bhaga_1	4458901	4459000	0	0	0	0.5	0	0.5	0.5
Bhaga_1	4460601	4460700	0.5	0	0.5	0.5	0	0	0.5
Bhaga_1	4471801	4471900	1	1	0.5	0.5	0.5	1	0.5
Bhaga_1	4486101	4486200	0	0	0	0.5	0.5	0.5	0
Bhaga_1	4492301	4492400	0	0.5	0.5	0.5	0	0.5	0
Bhaga_1	4513601	4513700	1	0.5	1	0.5	1	0.5	0.5
Bhaga_1	4515401	4515500	0.5	1	0.5	0.5	1	1	1
Bhaga_1	4515601	4515700	0.5	1	0.5	0.5	1	1	1
Bhaga_1	4547001	4547100	1	0.5	0.5	0.5	0.5	1	1
Bhaga_1	4561301	4561400	0.5	0.5	1	1	1	1	0.5
Bhaga_1	4572201	4572300	1	1	1	1	0.5	0.5	0.5
Bhaga_1	4573101	4573200	0.5	0.5	1	0.5	1	1	1
Bhaga_1	4573201	4573300	1	0.5	0.5	0.5	1	0.5	1
Bhaga_1	4580401	4580500	1	0.5	0.5	1	1	0.5	1
Bhaga_1	4585801	4585900	0.5	0.5	1	0.5	1	1	0.5
Bhaga_1	4597801	4597900	0.5	1	0.5	0.5	1	0.5	1
Bhaga_1	4602101	4602200	0.5	1	0.5	1	1	0.5	1
Bhaga_1	4606101	4606200	1	0.5	0.5	1	1	0.5	1
Bhaga_1	4612201	4612300	0.5	0.5	1	0.5	1	1	1
Bhaga_1	4613101	4613200	0	0	0.5	0	0.5	0	0.5
Bhaga_1	4614101	4614200	0	0.5	0	0.5	0	0	0.5
Bhaga_1	4622201	4622300	1	1	0.5	0.5	1	0.5	1
Bhaga_1	4625601	4625700	0.5	0	0	0.5	0	0.5	0.5
Bhaga_1	4628501	4628600	0.5	1	0.5	1	1	1	0.5
Bhaga_1	4631901	4632000	0.5	1	0.5	0.5	1	1	0.5
Bhaga_1	4632001	4632100	0.5	1	0.5	0.5	1	1	0.5
Bhaga_1	4632701	4632800	1	1	1	0.5	0.5	0.5	1
Bhaga_1	4633101	4633200	1	1	0.5	1	1	0.5	0.5
Bhaga_1	4637701	4637800	0.5	1	1	1	1	0.5	0.5
Bhaga_1	4638801	4638900	0.5	0.5	1	1	0.5	1	1
Bhaga_1	4648701	4648800	0.5	0	0	0.5	0	0.5	0
Bhaga_1	4650201	4650300	0.5	0	0.5	0	0	0.5	0
Bhaga_1	4654001	4654100	0.5	1	1	0.5	0.5	1	0.5
Bhaga_1	4654101	4654200	0.5	1	1	1	0.5	1	0.5
Bhaga_1	4654301	4654400	0.5	1	1	1	0.5	1	0.5
Bhaga_1	4656201	4656300	0	0	0	0.5	0	0.5	0.5
Bhaga_1	4656301	4656400	0	0	0	0.5	0	0.5	0.5
Bhaga_1	4665901	4666000	0.5	1	0.5	1	0.5	1	0.5
Bhaga_1	4666101	4666200	1	1	1	0.5	0.5	0.5	1
Bhaga_1	4666501	4666600	0.5	0.5	1	0.5	1	1	0.5
Bhaga_1	4670301	4670400	0.5	0.5	1	0.5	0.5	1	1
Bhaga_1	4670401	4670500	0.5	0.5	1	0.5	0.5	1	1
Bhaga_1	4670501	4670600	0.5	0.5	1	0.5	0.5	1	1
Bhaga_1	4672501	4672600	1	0.5	0.5	1	1	1	0.5
Bhaga_1	4698401	4698500	0	0.5	0.5	0	0	0.5	0
Bhaga_1	4701001	4701100	0.5	0.5	1	0.5	0.5	1	1
Bhaga_1	4703901	4704000	0.5	1	0.5	0.5	1	0.5	1
Bhaga_1	4704001	4704100	0.5	1	0.5	0.5	1	0.5	1
Bhaga_1	4704401	4704500	1	0.5	1	0.5	1	1	0.5
Bhaga_1	4707601	4707700	0.5	1	1	0.5	1	1	0.5
Bhaga_1	4707701	4707800	0.5	1	1	0.5	1	1	0.5
Bhaga_1	4708301	4708400	0.5	1	1	1	0.5	1	0.5
Bhaga_1	4710201	4710300	0.5	0.5	1	0.5	0.5	1	1
Bhaga_1	4711401	4711500	1	1	0.5	1	1	0.5	0.5
Bhaga_1	4711801	4711900	1	0.5	0.5	0.5	1	1	0.5
Bhaga_1	4712501	4712600	0.5	1	1	0.5	0.5	1	0.5
Bhaga_1	4713601	4713700	0.5	0.5	0	0.5	0	0.5	0
Bhaga_1	4718101	4718200	0	0.5	0.5	0	0.5	0.5	0
Bhaga_1	4724601	4724700	0.5	1	0.5	1	0.5	1	1
Bhaga_1	4724901	4725000	0	0	0	0.5	0.5	0.5	0.5
Bhaga_1	4726301	4726400	0	0.5	0	0	0.5	0.5	0.5
Bhaga_1	4726401	4726500	0	0.5	0	0	0.5	0.5	0.5
Bhaga_1	4726601	4726700	0.5	0.5	0.5	0	0	0.5	0
Bhaga_1	4728701	4728800	1	0.5	0.5	1	0.5	0.5	1
Bhaga_1	4731001	4731100	1	1	0.5	1	0.5	0.5	0.5
Bhaga_1	4733601	4733700	0	0	0.5	0.5	0	0.5	0
Bhaga_1	4739801	4739900	0.5	0	0	0	0.5	0	0.5
Bhaga_1	4742601	4742700	0.5	0.5	0.5	1	1	1	0.5
Bhaga_1	4743701	4743800	0.5	1	1	1	0.5	0.5	1
Bhaga_1	4745001	4745100	0.5	1	1	1	0.5	1	0.5
Bhaga_1	4745601	4745700	0	0.5	0	0.5	0	0	0.5
Bhaga_1	4749201	4749300	1	1	0.5	0.5	1	0.5	1
Bhaga_1	4755101	4755200	0.5	0.5	1	1	1	0.5	0.5
Bhaga_1	4768301	4768400	0.5	1	1	0.5	0.5	1	0.5
Bhaga_1	4772901	4773000	0.5	1	1	0.5	1	0.5	1
Bhaga_1	4773601	4773700	0.5	0.5	1	0.5	1	1	1
Bhaga_1	4781501	4781600	0.5	0.5	1	1	0.5	1	0.5
Bhaga_1	4788901	4789000	0	0.5	0	0	0	0.5	0.5
Bhaga_1	4795901	4796000	1	0.5	1	0.5	0.5	1	0.5
Bhaga_1	4796601	4796700	1	0.5	1	1	1	0.5	0.5
Bhaga_1	4797801	4797900	1	1	0.5	1	0.5	0.5	0.5
Bhaga_1	4811701	4811800	1	0.5	0.5	1	0.5	1	0.5
Bhaga_1	4825201	4825300	1	0.5	0.5	1	0.5	1	0.5
Bhaga_1	4826201	4826300	0.5	1	0.5	1	0.5	1	1
Bhaga_1	4829001	4829100	1	0.5	0.5	0.5	1	1	0.5
Bhaga_1	4830501	4830600	1	1	0.5	1	0.5	0.5	0.5
Bhaga_1	4840501	4840600	0.5	0.5	0	0	0.5	0	0.5
Bhaga_1	4841501	4841600	0.5	1	1	0.5	0.5	0.5	1
Bhaga_1	4843601	4843700	1	0.5	0.5	0.5	1	1	1
Bhaga_1	4844001	4844100	1	1	0.5	1	0.5	1	0.5
Bhaga_1	4844601	4844700	0.5	1	0.5	1	1	1	0.5
Bhaga_1	4846001	4846100	0.5	1	1	1	0.5	0.5	0.5
Bhaga_1	4846401	4846500	1	0.5	1	0.5	0.5	1	1
Bhaga_1	4848601	4848700	0.5	1	1	1	0.5	0.5	0.5
Bhaga_1	4848701	4848800	0.5	1	1	0.5	1	0.5	0.5
Bhaga_1	4849001	4849100	1	0.5	0.5	0.5	1	1	0.5
Bhaga_1	4849101	4849200	1	0.5	0.5	0.5	1	1	0.5
Bhaga_1	4849301	4849400	1	0.5	0.5	0.5	1	1	0.5
Bhaga_1	4852101	4852200	0.5	1	1	1	0.5	1	0.5
Bhaga_1	4852201	4852300	0.5	0.5	0.5	1	1	1	1
Bhaga_1	4854101	4854200	0.5	0.5	0	0	0	0.5	0.5
Bhaga_1	4855701	4855800	0.5	0.5	1	0.5	1	1	0.5
Bhaga_1	4859501	4859600	0.5	1	1	0.5	1	0.5	0.5
Bhaga_1	4859701	4859800	0.5	0.5	0.5	1	1	0.5	1
Bhaga_1	4863401	4863500	0.5	1	0.5	1	1	0.5	0.5
Bhaga_1	4866201	4866300	1	0.5	1	0.5	0.5	1	1
Bhaga_1	4871401	4871500	1	1	1	0.5	1	0.5	0.5
Bhaga_1	4875001	4875100	0.5	0	0	0.5	0.5	0	0
Bhaga_1	4875601	4875700	1	0.5	0.5	1	1	1	0.5
Bhaga_1	4876101	4876200	0.5	0.5	0.5	1	1	1	0.5
Bhaga_1	4877801	4877900	1	0.5	0.5	0.5	0.5	1	1
Bhaga_1	4877901	4878000	1	0.5	0.5	0.5	0.5	1	1
Bhaga_1	4878001	4878100	1	0.5	0.5	0.5	0.5	1	1
Bhaga_1	4878601	4878700	0.5	0.5	0	0.5	0	0	0.5
Bhaga_1	4881501	4881600	0.5	1	0.5	0.5	0.5	1	1
Bhaga_1	4884701	4884800	1	0.5	0.5	0.5	1	1	1
Bhaga_1	4885001	4885100	0	0	0.5	0.5	0.5	0.5	0
Bhaga_1	4887301	4887400	0	0	0	0.5	0.5	0	0.5
Bhaga_1	4888101	4888200	0.5	0.5	0.5	0.5	1	1	1
Bhaga_1	4889301	4889400	0	0	0	0.5	0.5	0.5	0.5
Bhaga_1	4890901	4891000	0.5	1	0.5	1	0.5	0.5	1
Bhaga_1	4894101	4894200	1	0.5	0.5	0.5	1	1	0.5
Bhaga_1	4896001	4896100	1	1	0.5	0.5	0.5	1	1
Bhaga_1	4903001	4903100	1	0.5	0.5	1	1	0.5	0.5
Bhaga_1	4903301	4903400	0.5	1	0.5	1	0.5	0.5	1
Bhaga_1	4912101	4912200	1	0.5	0.5	1	1	1	0.5
Bhaga_1	4925201	4925300	1	1	0.5	1	0.5	1	0.5
Bhaga_1	4925301	4925400	1	1	0.5	1	0.5	1	0.5
Bhaga_1	4925701	4925800	0.5	0.5	1	0.5	1	1	1
Bhaga_1	4936001	4936100	0	0.5	0.5	0.5	0	0	0.5
Bhaga_1	4936201	4936300	0.5	0	0	0.5	0.5	0.5	0
Bhaga_1	4936301	4936400	0.5	0	0	0.5	0.5	0.5	0
Bhaga_1	4941001	4941100	0.5	0.5	0	0	0.5	0.5	0
Bhaga_1	4948001	4948100	0.5	1	0.5	1	0.5	1	1
Bhaga_1	4955201	4955300	0.5	0	0.5	0.5	0	0.5	0
Bhaga_1	4960901	4961000	0.5	1	1	0.5	0.5	1	0.5
Bhaga_1	4968501	4968600	0.5	1	1	1	0.5	0.5	1
Bhaga_1	4969001	4969100	0.5	1	1	1	0.5	1	0.5
Bhaga_1	4974501	4974600	0.5	0.5	0.5	1	1	0.5	1
Bhaga_1	4976901	4977000	0.5	1	0.5	1	1	1	0.5
Bhaga_1	4977001	4977100	0.5	0.5	0.5	1	1	0.5	1
Bhaga_1	4977401	4977500	1	1	0.5	1	0.5	0.5	1
Bhaga_1	4979001	4979100	0.5	1	0.5	1	1	0.5	0.5
Bhaga_1	4979201	4979300	1	1	0.5	1	0.5	1	0.5
Bhaga_1	4979301	4979400	1	1	0.5	1	0.5	1	0.5
Bhaga_1	4980001	4980100	0.5	1	1	0.5	1	0.5	1
Bhaga_1	4981401	4981500	1	1	0.5	0.5	1	0.5	0.5
Bhaga_1	4981701	4981800	0.5	1	0.5	0.5	1	0.5	1
Bhaga_1	4982401	4982500	0.5	0	0.5	0.5	0.5	0	0
Bhaga_1	4986401	4986500	0.5	0.5	0.5	1	1	1	1
Bhaga_1	4991901	4992000	1	0.5	0.5	1	1	1	0.5
Bhaga_1	4994101	4994200	0	0	0.5	0	0.5	0	0.5
Bhaga_1	4995101	4995200	0.5	0.5	0.5	0	0	0	0.5
Bhaga_1	4995401	4995500	1	1	0.5	1	1	0.5	0.5
Bhaga_1	4997501	4997600	0.5	1	0.5	0.5	1	1	1
Bhaga_1	4998301	4998400	1	0.5	1	0.5	0.5	1	0.5
Bhaga_1	4998401	4998500	0.5	1	0.5	0.5	0.5	1	1
Bhaga_1	4999101	4999200	1	0.5	0.5	1	1	0.5	0.5
Bhaga_1	5001201	5001300	0.5	0	0.5	0.5	0	0	0.5
Bhaga_1	5003501	5003600	0.5	1	1	0.5	1	0.5	0.5
Bhaga_1	5005301	5005400	1	0.5	1	1	0.5	1	0.5
Bhaga_1	5006501	5006600	1	1	0.5	1	0.5	0.5	0.5
Bhaga_1	5006601	5006700	1	0.5	1	0.5	1	0.5	0.5
Bhaga_1	5006801	5006900	1	0.5	1	1	0.5	0.5	1
Bhaga_1	5006901	5007000	1	0.5	1	1	0.5	0.5	1
Bhaga_1	5012001	5012100	0.5	0	0	0	0.5	0.5	0
Bhaga_1	5012101	5012200	0.5	0	0	0	0.5	0.5	0
Bhaga_1	5012201	5012300	0.5	0	0	0	0.5	0.5	0
Bhaga_1	5012301	5012400	0.5	0	0.5	0	0.5	0.5	0
Bhaga_1	5012401	5012500	0.5	0	0.5	0	0.5	0.5	0
Bhaga_1	5013101	5013200	0.5	0.5	1	1	0.5	1	0.5
Bhaga_1	5016901	5017000	0.5	1	0.5	1	0.5	1	1
Bhaga_1	5017001	5017100	0.5	1	0.5	1	0.5	0.5	1
Bhaga_1	5017801	5017900	0.5	1	0.5	0.5	1	1	0.5
Bhaga_1	5021501	5021600	0.5	0.5	0	0	0	0.5	0
Bhaga_1	5022601	5022700	1	1	0.5	0.5	1	1	0.5
Bhaga_1	5022801	5022900	0.5	1	0.5	0.5	0.5	1	1
Bhaga_1	5029601	5029700	0	0.5	0	0	0	0.5	0.5
Bhaga_1	5029701	5029800	0	0.5	0	0	0	0.5	0.5
Bhaga_1	5032101	5032200	1	0.5	1	1	0.5	1	0.5
Bhaga_1	5034301	5034400	0.5	1	1	0.5	1	0.5	0.5
Bhaga_1	5039301	5039400	1	1	0.5	0.5	1	0.5	1
Bhaga_1	5040001	5040100	0.5	0.5	0	0	0.5	0	0.5
Bhaga_1	5042301	5042400	0	0	0	0.5	0	0.5	0.5
Bhaga_1	5059501	5059600	1	1	1	0.5	1	0.5	0.5
Bhaga_1	5059601	5059700	1	0.5	1	0.5	1	0.5	0.5
Bhaga_1	5061301	5061400	0.5	0.5	0.5	1	1	0.5	1
Bhaga_1	5061401	5061500	0.5	1	1	1	0.5	0.5	0.5
Bhaga_1	5061901	5062000	0.5	0	0	0	0.5	0	0.5
Bhaga_1	5065201	5065300	0.5	0.5	0.5	1	1	1	1
Bhaga_1	5065601	5065700	1	0.5	0.5	1	0.5	1	1
Bhaga_1	5067301	5067400	0.5	0.5	0.5	0	0.5	0	0
Bhaga_1	5068401	5068500	0.5	1	1	0.5	1	0.5	1
Bhaga_1	5068701	5068800	1	0.5	0.5	0.5	1	0.5	1
Bhaga_1	5131001	5131100	0.5	1	0.5	1	0.5	1	0.5
Bhaga_1	5131101	5131200	1	0.5	0.5	0.5	0.5	1	1
Bhaga_1	5135401	5135500	0.5	0	0.5	0	0	0.5	0.5
Bhaga_1	5136501	5136600	0.5	0	0	0	0	0.5	0.5
Bhaga_1	5136701	5136800	0.5	0	0	0.5	0	0.5	0.5
Bhaga_1	5140301	5140400	0.5	0.5	0	0.5	0	0	0
Bhaga_1	5145101	5145200	1	0.5	1	0.5	1	1	0.5
Bhaga_1	5152501	5152600	1	1	0.5	1	1	0.5	0.5
Bhaga_1	5163901	5164000	1	0.5	0.5	1	1	0.5	0.5
Bhaga_1	5170001	5170100	0.5	0.5	0.5	0	0.5	0	0
Bhaga_1	5173401	5173500	1	0.5	1	1	0.5	0.5	0.5
Bhaga_1	5174901	5175000	1	0.5	1	0.5	1	0.5	1
Bhaga_1	5175101	5175200	1	0.5	1	0.5	0.5	1	1
Bhaga_1	5178501	5178600	0	0.5	0	0	0	0.5	0.5
Bhaga_1	5179301	5179400	1	0.5	0.5	0.5	1	1	0.5
Bhaga_1	5188701	5188800	0.5	0	0.5	0.5	0	0	0.5
Bhaga_1	5191101	5191200	0.5	1	0.5	0.5	0.5	1	1
Bhaga_1	5197901	5198000	0	0.5	0.5	0.5	0	0	0.5
Bhaga_1	5202301	5202400	0	0.5	0.5	0.5	0.5	0	0
Bhaga_1	5214801	5214900	1	0.5	1	0.5	0.5	1	0.5
Bhaga_1	5215401	5215500	1	0.5	0.5	1	0.5	1	1
Bhaga_1	5221901	5222000	0	0	0.5	0.5	0	0.5	0
Bhaga_1	5223801	5223900	0.5	1	0.5	1	0.5	0.5	1
Bhaga_1	5225401	5225500	0.5	1	0.5	0.5	1	0.5	1
Bhaga_1	5242701	5242800	0.5	1	1	1	0.5	0.5	1
Bhaga_1	5245801	5245900	1	0.5	0.5	0.5	1	0.5	1
Bhaga_1	5248301	5248400	0.5	0.5	1	1	1	1	0.5
Bhaga_1	5249801	5249900	1	0.5	1	1	0.5	0.5	1
Bhaga_1	5272401	5272500	0.5	1	1	0.5	1	0.5	1
Bhaga_1	5277801	5277900	0	0	0.5	0	0.5	0	0.5
Bhaga_1	5277901	5278000	0	0	0.5	0.5	0.5	0	0.5
Bhaga_1	5298101	5298200	0.5	0.5	0.5	1	1	0.5	1
Bhaga_1	5308401	5308500	1	1	0.5	0.5	1	0.5	0.5
Bhaga_1	5309401	5309500	1	1	0.5	0.5	1	0.5	0.5
Bhaga_1	5309701	5309800	0.5	1	1	0.5	1	0.5	1
Bhaga_1	5313501	5313600	0.5	0	0	0	0	0.5	0.5
Bhaga_1	5316001	5316100	1	0.5	1	1	1	0.5	0.5
Bhaga_1	5320901	5321000	1	0.5	0.5	1	0.5	0.5	1
Bhaga_1	5327601	5327700	0.5	1	0.5	1	1	1	0.5
Bhaga_1	5327701	5327800	0.5	1	0.5	1	0.5	1	0.5
Bhaga_1	5337901	5338000	0.5	0.5	1	1	1	0.5	1
Bhaga_1	5338801	5338900	0.5	0.5	1	1	0.5	1	0.5
Bhaga_1	5339101	5339200	0	0.5	0.5	0.5	0.5	0	0
Bhaga_1	5342401	5342500	0.5	1	1	0.5	1	1	0.5
Bhaga_1	5344301	5344400	0	0.5	0	0	0	0.5	0.5
Bhaga_1	5357401	5357500	1	0.5	1	0.5	1	0.5	0.5
Bhaga_1	5360601	5360700	1	1	0.5	0.5	0.5	0.5	1
Bhaga_1	5360801	5360900	1	1	1	1	0.5	0.5	0.5
Bhaga_1	5369101	5369200	0.5	1	0.5	0.5	0.5	1	1
Bhaga_1	5373501	5373600	1	1	0.5	0.5	0.5	0.5	1
Bhaga_1	5378401	5378500	1	1	0.5	0.5	0.5	0.5	1
Bhaga_1	5378801	5378900	1	0.5	0.5	1	0.5	1	1
Bhaga_1	5386801	5386900	0.5	0	0	0	0.5	0.5	0
Bhaga_1	5397801	5397900	1	1	0.5	1	0.5	1	0.5
Bhaga_1	5398001	5398100	1	1	0.5	1	0.5	0.5	0.5
Bhaga_1	5399801	5399900	0.5	0.5	1	0.5	1	0.5	1
Bhaga_1	5405201	5405300	0.5	0.5	1	1	1	1	0.5
Bhaga_1	5410601	5410700	0.5	1	0.5	1	1	0.5	0.5
Bhaga_1	5410701	5410800	1	1	0.5	1	1	0.5	0.5
Bhaga_1	5410801	5410900	1	1	0.5	1	1	0.5	0.5
Bhaga_1	5410901	5411000	1	1	0.5	1	0.5	0.5	0.5
Bhaga_1	5412001	5412100	0.5	0.5	0.5	1	1	0.5	1
Bhaga_1	5428001	5428100	0.5	0.5	1	1	0.5	1	1
Bhaga_1	5430201	5430300	1	0.5	1	1	0.5	0.5	1
Bhaga_1	5445001	5445100	0.5	0.5	0.5	0	0.5	0	0
Bhaga_1	5448201	5448300	1	1	0.5	1	0.5	0.5	1
Bhaga_1	5451601	5451700	1	0.5	0.5	0.5	1	1	1
Bhaga_1	5451801	5451900	0	0.5	0	0.5	0	0.5	0.5
Bhaga_1	5476501	5476600	0.5	1	1	1	0.5	0.5	1
Bhaga_1	5476601	5476700	0.5	0.5	1	1	1	0.5	1
Bhaga_1	5477301	5477400	0.5	0	0	0.5	0	0.5	0
Bhaga_1	5495201	5495300	0.5	1	0.5	1	1	1	0.5
Bhaga_1	5523801	5523900	0.5	1	1	0.5	1	0.5	1
Bhaga_1	5541201	5541300	0.5	1	0.5	1	0.5	1	1
Bhaga_1	5542701	5542800	0.5	1	0.5	1	1	0.5	1
Bhaga_1	5542801	5542900	0.5	1	0.5	1	1	0.5	1
Bhaga_1	5548201	5548300	0.5	1	1	1	1	0.5	0.5
Bhaga_1	5548401	5548500	0.5	1	1	1	0.5	0.5	1
Bhaga_1	5548701	5548800	0.5	1	1	1	0.5	0.5	1
Bhaga_1	5551101	5551200	0.5	0.5	0	0.5	0	0.5	0
Bhaga_1	5551301	5551400	0.5	0.5	0	0	0.5	0	0.5
Bhaga_1	5551401	5551500	0.5	0.5	0	0	0.5	0	0
Bhaga_1	5559601	5559700	1	0.5	0.5	1	0.5	1	1
Bhaga_1	5569201	5569300	1	0.5	1	1	1	0.5	0.5
Bhaga_1	5593501	5593600	0.5	0.5	0.5	1	0.5	1	1
Bhaga_1	5599001	5599100	1	0.5	0.5	1	0.5	1	1
Bhaga_1	5603201	5603300	0.5	0.5	1	1	0.5	1	0.5
Bhaga_1	5604301	5604400	1	0.5	0.5	1	0.5	0.5	1
Bhaga_1	5615101	5615200	0.5	0.5	0.5	1	1	1	0.5
Bhaga_1	5620001	5620100	0.5	1	0.5	0.5	1	1	0.5
Bhaga_1	5630301	5630400	0	0	0	0.5	0.5	0	0.5
Bhaga_1	5630601	5630700	0.5	0	0.5	0	0	0.5	0.5
Bhaga_1	5632501	5632600	1	0.5	1	0.5	0.5	1	0.5
Bhaga_1	5633901	5634000	0	0	0.5	0.5	0.5	0	0
Bhaga_1	5640401	5640500	0.5	0.5	0	0	0.5	0.5	0
Bhaga_1	5640501	5640600	0.5	0.5	0	0	0.5	0.5	0
Bhaga_1	5643901	5644000	1	1	1	0.5	1	0.5	0.5
Bhaga_1	5644701	5644800	0.5	0.5	1	1	0.5	1	0.5
Bhaga_1	5659401	5659500	0.5	1	1	1	0.5	1	0.5
Bhaga_1	5660901	5661000	0.5	1	0.5	1	0.5	1	0.5
Bhaga_1	5665601	5665700	0.5	1	1	1	1	0.5	0.5
Bhaga_1	5666501	5666600	1	0.5	0.5	1	0.5	1	1
Bhaga_1	5671901	5672000	0.5	0.5	0	0	0	0.5	0
Bhaga_1	5674501	5674600	1	0.5	1	0.5	1	1	0.5
Bhaga_1	5676001	5676100	1	0.5	1	0.5	1	1	0.5
Bhaga_1	5682801	5682900	0.5	1	0.5	1	1	1	0.5
Bhaga_1	5697401	5697500	1	1	1	0.5	0.5	0.5	0.5
Bhaga_1	5698201	5698300	0.5	1	1	1	1	0.5	0.5
Bhaga_1	5699801	5699900	1	0.5	0.5	1	0.5	1	0.5
Bhaga_1	5699901	5700000	0.5	1	0.5	0.5	0.5	1	1
Bhaga_1	5701601	5701700	1	0.5	1	0.5	0.5	1	1
Bhaga_1	5706401	5706500	0	0.5	0.5	0	0.5	0.5	0
Bhaga_1	5713301	5713400	0	0.5	0.5	0.5	0	0	0
Bhaga_1	5713401	5713500	0.5	0.5	0.5	0.5	0	0	0
Bhaga_1	5732501	5732600	1	1	1	0.5	0.5	1	0.5
Bhaga_1	5733701	5733800	1	0.5	1	1	0.5	0.5	1
Bhaga_1	5735401	5735500	0	0.5	0.5	0.5	0.5	0	0
Bhaga_1	5741201	5741300	0.5	0.5	0.5	1	1	1	1
Bhaga_1	5747001	5747100	0.5	0.5	1	0.5	1	1	0.5
Bhaga_1	5747101	5747200	0.5	0.5	0	0	0.5	0	0
Bhaga_1	5748101	5748200	1	0.5	0.5	1	0.5	1	0.5
Bhaga_1	5748201	5748300	1	0.5	1	1	0.5	0.5	1
Bhaga_1	5766501	5766600	0.5	0	0	0.5	0	0	0.5
Bhaga_1	5766601	5766700	0.5	0	0.5	0.5	0	0	0.5
Bhaga_1	5767001	5767100	1	0.5	0.5	1	1	0.5	1
Bhaga_1	5767701	5767800	1	1	1	0.5	0.5	0.5	0.5
Bhaga_1	5768301	5768400	0.5	0.5	1	0.5	1	1	0.5
Bhaga_1	5769201	5769300	1	0.5	1	1	1	0.5	0.5
Bhaga_1	5770201	5770300	1	0.5	0.5	1	1	0.5	1
Bhaga_1	5772801	5772900	0	0	0.5	0.5	0	0.5	0.5
Bhaga_1	5774101	5774200	0.5	0	0	0.5	0.5	0	0.5
Bhaga_1	5779501	5779600	0.5	0.5	0.5	1	0.5	1	1
Bhaga_1	5781201	5781300	1	1	1	0.5	0.5	0.5	0.5
Bhaga_1	5785601	5785700	1	0.5	0.5	0.5	1	1	1
Bhaga_1	5791401	5791500	1	0.5	0.5	1	1	0.5	1
Bhaga_1	5797701	5797800	0.5	1	0.5	0.5	1	0.5	1
Bhaga_1	5799301	5799400	0.5	1	1	0.5	1	0.5	0.5
Bhaga_1	5805701	5805800	1	0.5	0.5	0.5	1	0.5	1
Bhaga_1	5806001	5806100	1	1	1	0.5	0.5	1	0.5
Bhaga_1	5806601	5806700	0.5	0.5	0.5	0.5	1	1	1
Bhaga_1	5806701	5806800	0.5	0.5	0.5	0.5	1	1	1
Bhaga_1	5810701	5810800	0.5	1	1	0.5	1	0.5	0.5
Bhaga_1	5813401	5813500	1	1	0.5	1	1	0.5	0.5
Bhaga_1	5813501	5813600	1	1	0.5	1	1	0.5	0.5
Bhaga_1	5815001	5815100	1	0.5	1	1	0.5	1	0.5
Bhaga_1	5831601	5831700	0	0	0.5	0.5	0.5	0	0
Bhaga_1	5832201	5832300	0.5	0.5	0	0	0	0	0.5
Bhaga_1	5832401	5832500	0.5	1	0.5	1	1	1	0.5
Bhaga_1	5844901	5845000	0	0.5	0.5	0	0.5	0	0
Bhaga_1	5847401	5847500	1	1	1	0.5	0.5	0.5	1
Bhaga_1	5847501	5847600	0.5	1	1	1	0.5	0.5	1
Bhaga_1	5847601	5847700	0.5	1	1	0.5	0.5	0.5	1
Bhaga_1	5850201	5850300	0.5	0.5	1	1	1	0.5	1
Bhaga_1	5850501	5850600	0.5	0.5	1	1	1	0.5	1
Bhaga_1	5850601	5850700	0.5	0.5	1	1	1	0.5	1
Bhaga_1	5851301	5851400	0.5	1	1	1	0.5	1	0.5
Bhaga_1	5851801	5851900	1	0.5	0.5	0.5	0.5	1	1
Bhaga_1	5860601	5860700	1	0.5	0.5	1	0.5	0.5	1
Bhaga_1	5869301	5869400	0	0	0	0.5	0	0.5	0.5
Bhaga_1	5869701	5869800	1	0.5	1	0.5	0.5	0.5	1
Bhaga_1	5873201	5873300	0.5	0.5	1	1	0.5	0.5	1
Bhaga_1	5873801	5873900	1	0.5	1	1	0.5	1	0.5
Bhaga_1	5877801	5877900	0	0	0	0.5	0.5	0.5	0
Bhaga_1	5885001	5885100	0.5	1	0.5	0.5	1	1	0.5
Bhaga_1	5885901	5886000	0.5	1	0.5	0.5	1	1	1
Bhaga_1	5888401	5888500	0	0.5	0	0.5	0	0.5	0.5
Bhaga_1	5888601	5888700	1	0.5	1	1	0.5	1	0.5
Bhaga_1	5890701	5890800	0.5	1	0.5	0.5	1	1	1
Bhaga_1	5893401	5893500	1	0.5	1	1	1	0.5	0.5
Bhaga_1	5897601	5897700	1	0.5	1	0.5	1	0.5	1
Bhaga_1	5915801	5915900	0.5	0.5	1	1	0.5	1	0.5
Bhaga_1	5915901	5916000	0.5	1	1	1	1	0.5	0.5
Bhaga_1	5918101	5918200	0.5	0	0	0.5	0	0	0.5
Bhaga_1	5925101	5925200	1	1	0.5	1	0.5	1	0.5
Bhaga_1	5926801	5926900	0.5	0	0	0.5	0	0.5	0.5
Bhaga_1	5929701	5929800	1	1	1	0.5	0.5	0.5	0.5
Bhaga_1	5934401	5934500	0.5	0.5	0.5	0	0.5	0	0
Bhaga_1	5944201	5944300	0.5	0.5	1	1	0.5	1	1
Bhaga_1	5944501	5944600	0.5	1	0.5	1	0.5	1	0.5
Bhaga_1	5945801	5945900	0.5	0.5	0.5	1	1	1	0.5
Bhaga_1	5945901	5946000	0.5	0	0.5	0.5	0.5	0	0
Bhaga_1	5946201	5946300	1	0.5	0.5	1	1	0.5	0.5
Bhaga_1	5948701	5948800	0.5	1	1	0.5	1	0.5	1
Bhaga_1	5949901	5950000	0.5	1	0.5	0.5	0.5	1	1
Bhaga_1	5951301	5951400	0.5	1	1	0.5	1	0.5	0.5
Bhaga_1	5958401	5958500	1	0.5	1	0.5	1	0.5	0.5
Bhaga_1	5960301	5960400	0.5	0.5	0	0	0.5	0.5	0
Bhaga_1	5964501	5964600	0.5	0.5	0.5	0	0	0	0.5
Bhaga_1	5964801	5964900	0.5	0.5	0.5	0	0	0	0.5
Bhaga_1	5964901	5965000	0.5	0.5	0.5	0	0	0	0.5
Bhaga_1	5965001	5965100	0.5	0.5	0.5	0	0	0	0.5
Bhaga_1	5965801	5965900	0	0.5	0.5	0	0.5	0	0.5
Bhaga_1	5968401	5968500	1	0.5	1	0.5	0.5	1	1
Bhaga_1	5970101	5970200	0.5	1	0.5	1	1	1	0.5
Bhaga_1	5972701	5972800	0	0.5	0.5	0	0.5	0.5	0
Bhaga_1	5972801	5972900	0	0.5	0.5	0	0	0.5	0
Bhaga_1	5972901	5973000	0	0.5	0.5	0	0	0.5	0
Bhaga_1	5975201	5975300	0	0.5	0	0	0	0.5	0.5
Bhaga_1	5978901	5979000	0.5	0.5	0.5	0	0	0	0
Bhaga_1	5979701	5979800	0.5	0.5	0	0	0.5	0	0.5
Bhaga_1	5981501	5981600	0.5	0	0	0	0	0.5	0.5
Bhaga_1	5993201	5993300	0.5	0	0	0	0	0.5	0.5
Bhaga_1	6018101	6018200	1	0.5	0.5	1	0.5	0.5	1
Bhaga_1	6030201	6030300	0.5	1	1	1	0.5	0.5	0.5
Bhaga_1	6046101	6046200	0.5	0.5	0.5	0	0	0	0
Bhaga_1	6046201	6046300	1	0.5	0.5	0.5	1	1	0.5
Bhaga_1	6053001	6053100	0.5	0.5	1	0.5	1	1	0.5
Bhaga_1	6055201	6055300	0	0.5	0	0.5	0.5	0	0
Bhaga_1	6055701	6055800	0.5	1	1	0.5	1	0.5	1
Bhaga_1	6060001	6060100	0.5	0	0	0.5	0	0.5	0
Bhaga_1	6064501	6064600	0.5	0.5	1	1	0.5	1	0.5
Bhaga_1	6065401	6065500	0.5	1	0.5	1	1	1	0.5
Bhaga_1	6067601	6067700	0	0	0	0	0.5	0.5	0.5
Bhaga_1	6069701	6069800	0.5	0.5	0	0	0.5	0.5	0
Bhaga_1	6069801	6069900	0.5	0.5	0.5	0	0.5	0	0
Bhaga_1	6087301	6087400	0	0	0	0.5	0	0.5	0.5
Bhaga_1	6104601	6104700	0.5	0.5	0.5	0.5	1	1	1
Bhaga_1	6107001	6107100	1	0.5	1	1	0.5	0.5	0.5
Bhaga_1	6107601	6107700	1	1	1	0.5	1	0.5	0.5
Bhaga_1	6120501	6120600	0.5	0.5	0.5	1	0.5	1	1
Bhaga_1	6129701	6129800	0.5	0.5	0.5	0	0	0	0
Bhaga_1	6134701	6134800	0.5	0.5	1	0.5	1	0.5	1
Bhaga_1	6135201	6135300	1	1	1	0.5	1	0.5	0.5
Bhaga_1	6140101	6140200	1	0.5	1	1	1	0.5	0.5
Bhaga_1	6140701	6140800	1	0.5	0.5	1	0.5	1	0.5
Bhaga_1	6141301	6141400	0.5	0.5	1	1	0.5	0.5	1
Bhaga_1	6144901	6145000	1	1	1	0.5	0.5	0.5	1
Bhaga_1	6145401	6145500	0.5	0.5	0.5	0	0	0.5	0
Bhaga_1	6159201	6159300	1	1	1	0.5	0.5	1	0.5
Bhaga_1	6191001	6191100	0	0	0	0.5	0	0.5	0.5
Bhaga_1	6204701	6204800	0.5	1	0.5	1	0.5	0.5	1
Bhaga_1	6207201	6207300	1	0.5	1	0.5	0.5	1	1
Bhaga_1	6226701	6226800	0.5	1	1	0.5	1	1	0.5
Bhaga_1	6227901	6228000	0.5	1	0.5	1	1	0.5	1
Bhaga_1	6250801	6250900	0.5	0.5	1	1	1	1	0.5
Bhaga_1	6263001	6263100	0.5	0.5	1	1	1	0.5	0.5
Bhaga_1	6263101	6263200	0.5	0.5	1	0.5	1	1	0.5
Bhaga_1	6273901	6274000	1	0.5	1	0.5	0.5	1	0.5
Bhaga_1	6278001	6278100	0.5	0.5	0.5	1	1	0.5	1
Bhaga_1	6293601	6293700	1	0.5	1	1	0.5	0.5	0.5
Bhaga_1	6293701	6293800	1	0.5	0.5	1	1	0.5	0.5
Bhaga_1	6293801	6293900	1	0.5	0.5	1	1	0.5	0.5
Bhaga_1	6305201	6305300	1	1	1	0.5	0.5	0.5	0.5
Bhaga_1	6305301	6305400	1	1	1	0.5	0.5	0.5	0.5
Bhaga_1	6307501	6307600	1	0.5	0.5	1	0.5	1	0.5
Bhaga_1	6309401	6309500	1	0.5	0.5	1	0.5	1	1
Bhaga_1	6309501	6309600	1	0.5	0.5	1	0.5	1	1
Bhaga_1	6315501	6315600	1	1	1	0.5	0.5	1	0.5
Bhaga_1	6323301	6323400	0.5	1	1	0.5	1	0.5	1
Bhaga_1	6325601	6325700	0.5	0.5	0.5	1	1	0.5	1
Bhaga_1	6326501	6326600	0	0	0.5	0.5	0	0	0.5
Bhaga_1	6344801	6344900	0.5	0	0.5	0.5	0	0	0
Bhaga_1	6347901	6348000	1	0.5	1	0.5	0.5	0.5	1
Bhaga_1	6361401	6361500	1	1	0.5	0.5	1	0.5	0.5
Bhaga_1	6362401	6362500	1	0.5	1	0.5	0.5	1	0.5
Bhaga_1	6376201	6376300	0.5	1	0.5	1	0.5	1	1
Bhaga_1	6376301	6376400	0.5	1	0.5	1	0.5	1	1
Bhaga_1	6377501	6377600	0.5	0.5	1	1	1	0.5	0.5
Bhaga_1	6377601	6377700	1	0.5	1	0.5	1	0.5	0.5
Bhaga_1	6388001	6388100	0.5	0	0	0.5	0	0.5	0
Bhaga_1	6412101	6412200	0.5	0.5	1	0.5	1	1	1
Bhaga_1	6417301	6417400	0.5	0.5	0	0	0.5	0	0.5
Bhaga_1	6418601	6418700	0.5	1	0.5	0.5	1	1	0.5
Bhaga_1	6422501	6422600	0	0	0.5	0.5	0	0.5	0.5
Bhaga_1	6423801	6423900	1	0.5	1	0.5	0.5	1	1
Bhaga_1	6429401	6429500	0.5	1	1	1	1	0.5	0.5
Bhaga_1	6429501	6429600	0.5	1	0.5	1	1	0.5	0.5
Bhaga_1	6436001	6436100	0.5	0.5	1	0.5	1	1	0.5
Bhaga_1	6436101	6436200	0.5	0.5	1	0.5	1	1	0.5
Bhaga_1	6455201	6455300	0	0.5	0.5	0.5	0.5	0	0
Bhaga_1	6458801	6458900	0.5	0.5	0	0	0.5	0.5	0
Bhaga_1	6462501	6462600	0.5	1	0.5	0.5	1	1	1
Bhaga_1	6463501	6463600	0.5	1	1	0.5	1	0.5	0.5
Bhaga_1	6464301	6464400	1	0.5	1	1	0.5	1	0.5
Bhaga_1	6464901	6465000	0.5	0.5	0	0	0.5	0	0.5
Bhaga_1	6466701	6466800	0.5	0.5	1	0.5	1	0.5	1
Bhaga_1	6473401	6473500	1	1	0.5	1	0.5	0.5	1
Bhaga_1	6473601	6473700	0.5	1	1	0.5	0.5	1	0.5
Bhaga_1	6473701	6473800	0.5	1	0.5	1	0.5	1	0.5
Bhaga_1	6475201	6475300	0.5	0.5	0.5	1	1	1	1
Bhaga_1	6477901	6478000	0	0	0	0	0.5	0.5	0.5
Bhaga_1	6481001	6481100	1	0.5	1	1	0.5	0.5	0.5
Bhaga_1	6482201	6482300	1	1	0.5	0.5	1	1	0.5
Bhaga_1	6488301	6488400	0.5	0.5	0	0	0.5	0	0
Bhaga_1	6495101	6495200	1	1	0.5	0.5	0.5	1	0.5
Bhaga_1	6498301	6498400	0.5	1	0.5	0.5	1	0.5	1
Bhaga_1	6498501	6498600	0.5	0	0	0	0.5	0	0.5
Bhaga_1	6501401	6501500	1	0.5	0.5	0.5	0.5	1	1
Bhaga_1	6510601	6510700	0	0.5	0.5	0	0	0.5	0
Bhaga_1	6515501	6515600	1	1	0.5	1	1	0.5	0.5
Bhaga_1	6527501	6527600	1	0.5	1	0.5	0.5	1	0.5
Bhaga_1	6533801	6533900	1	0.5	1	0.5	1	1	0.5
Bhaga_1	6535501	6535600	0.5	1	0.5	1	1	0.5	0.5
Bhaga_1	6543801	6543900	1	0.5	1	1	1	0.5	0.5
Bhaga_1	6543901	6544000	1	0.5	1	1	1	0.5	0.5
Bhaga_1	6544201	6544300	0.5	0.5	1	0.5	1	1	1
Bhaga_1	6544301	6544400	1	0.5	1	0.5	1	1	0.5
Bhaga_1	6552501	6552600	0.5	0.5	1	1	0.5	1	1
Bhaga_1	6564701	6564800	0.5	0.5	0.5	0.5	1	1	1
Bhaga_1	6565401	6565500	0.5	0.5	1	0.5	1	1	0.5
Bhaga_1	6572001	6572100	1	0.5	1	1	1	0.5	0.5
Bhaga_1	6575901	6576000	0.5	1	1	1	1	0.5	0.5
Bhaga_1	6585801	6585900	0.5	0	0	0	0.5	0.5	0
Bhaga_1	6586301	6586400	0	0	0.5	0	0.5	0	0.5
Bhaga_1	6595801	6595900	0.5	1	0.5	0.5	0.5	1	1
Bhaga_1	6604901	6605000	0	0.5	0	0.5	0.5	0.5	0
Bhaga_1	6611801	6611900	0.5	0.5	1	1	1	0.5	1
Bhaga_1	6615501	6615600	0.5	1	1	0.5	0.5	0.5	1
Bhaga_1	6616601	6616700	1	1	0.5	1	1	0.5	0.5
Bhaga_1	6620501	6620600	1	0.5	1	0.5	1	0.5	1
Bhaga_1	6623001	6623100	0.5	1	0.5	1	1	0.5	0.5
Bhaga_1	6623901	6624000	0	0	0.5	0.5	0.5	0	0.5
Bhaga_1	6624301	6624400	0.5	0	0.5	0	0.5	0	0.5
Bhaga_1	6629201	6629300	0.5	0	0.5	0.5	0	0	0
Bhaga_1	6633301	6633400	0.5	0.5	0.5	1	1	0.5	1
Bhaga_1	6638201	6638300	1	0.5	0.5	1	0.5	1	1
Bhaga_1	6644101	6644200	0.5	1	1	1	0.5	1	0.5
Bhaga_1	6661801	6661900	1	0.5	1	1	1	0.5	0.5
Bhaga_1	6662201	6662300	0.5	1	1	0.5	0.5	1	1
Bhaga_1	6671201	6671300	1	1	0.5	1	0.5	1	0.5
Bhaga_1	6671501	6671600	0	0.5	0.5	0	0	0	0.5
Bhaga_1	6671601	6671700	0	0.5	0.5	0	0	0	0.5
Bhaga_1	6671701	6671800	0	0.5	0.5	0	0	0	0.5
Bhaga_1	6671801	6671900	0	0.5	0.5	0	0	0	0.5
Bhaga_1	6673601	6673700	0.5	0.5	1	1	0.5	0.5	1
Bhaga_1	6676101	6676200	0.5	0.5	0.5	0	0	0	0.5
Bhaga_1	6680801	6680900	0.5	0	0	0.5	0.5	0.5	0
Bhaga_1	6680901	6681000	0.5	0	0	0	0.5	0.5	0
Bhaga_1	6681001	6681100	0.5	0.5	0	0	0.5	0.5	0
Bhaga_1	6683401	6683500	0.5	1	1	0.5	1	0.5	1
Bhaga_1	6683601	6683700	0.5	1	1	0.5	1	0.5	1
Bhaga_1	6685101	6685200	0.5	0.5	0.5	0	0	0	0.5
Bhaga_1	6693901	6694000	0.5	0.5	0.5	1	1	1	1
Bhaga_1	6700801	6700900	0.5	0.5	0	0	0.5	0.5	0
Bhaga_1	6720601	6720700	0.5	0	0.5	0.5	0	0	0
Bhaga_1	6725001	6725100	0.5	0.5	0.5	1	1	0.5	1
Bhaga_1	6731401	6731500	0.5	1	0.5	0.5	1	1	1
Bhaga_1	6735601	6735700	0.5	1	0.5	1	0.5	0.5	1
Bhaga_1	6742701	6742800	0	0	0.5	0.5	0	0	0.5
Bhaga_1	6747501	6747600	0.5	0	0	0.5	0	0.5	0.5
Bhaga_1	6747901	6748000	0	0.5	0.5	0	0	0	0.5
Bhaga_1	6748001	6748100	0	0.5	0.5	0	0	0	0.5
Bhaga_1	6761801	6761900	1	0.5	0.5	1	1	1	0.5
Bhaga_1	6762801	6762900	1	0.5	1	1	1	0.5	0.5
Bhaga_1	6765501	6765600	0.5	0.5	0.5	1	0.5	1	1
Bhaga_1	6770201	6770300	0.5	0.5	1	1	1	1	0.5
Bhaga_1	6771101	6771200	0	0.5	0	0.5	0.5	0	0.5
Bhaga_1	6771201	6771300	0	0.5	0	0	0.5	0	0.5
Bhaga_1	6773401	6773500	1	1	1	0.5	1	0.5	0.5
Bhaga_1	6774101	6774200	0.5	1	1	0.5	0.5	0.5	1
Bhaga_1	6774501	6774600	1	1	1	1	0.5	0.5	0.5
Bhaga_1	6782001	6782100	1	0.5	1	0.5	1	0.5	1
Bhaga_1	6797901	6798000	0.5	1	0.5	1	0.5	1	0.5
Bhaga_1	6827201	6827300	0.5	1	0.5	0.5	1	1	0.5
Bhaga_1	6827301	6827400	0	0.5	0.5	0.5	0	0	0
Bhaga_1	6829501	6829600	1	1	0.5	0.5	1	0.5	1
Bhaga_1	6830401	6830500	0.5	1	1	1	1	0.5	0.5
Bhaga_1	6830701	6830800	1	1	0.5	0.5	1	0.5	0.5
Bhaga_1	6833901	6834000	1	0.5	0.5	0.5	1	0.5	1
Bhaga_1	6834001	6834100	1	0.5	1	0.5	1	0.5	1
Bhaga_1	6834601	6834700	0.5	1	1	0.5	1	1	0.5
Bhaga_1	6835301	6835400	1	1	0.5	0.5	1	0.5	0.5
Bhaga_1	6836101	6836200	0	0.5	0.5	0	0	0.5	0.5
Bhaga_1	6836201	6836300	0	0.5	0.5	0	0	0.5	0
Bhaga_1	6851401	6851500	0.5	1	0.5	1	0.5	1	1
Bhaga_1	6866401	6866500	1	1	1	0.5	0.5	0.5	0.5
Bhaga_1	6866501	6866600	1	1	1	0.5	0.5	0.5	1
Bhaga_1	6893501	6893600	1	1	0.5	1	1	0.5	0.5
Bhaga_1	6894001	6894100	1	0.5	0.5	0.5	1	1	1
Bhaga_1	6900401	6900500	0.5	0.5	1	1	1	0.5	0.5
Bhaga_1	6903401	6903500	0.5	0.5	0.5	1	1	1	1
Bhaga_1	6903801	6903900	0.5	0.5	1	1	1	0.5	1
Bhaga_1	6904201	6904300	1	0.5	0.5	1	0.5	0.5	1
Bhaga_1	6906001	6906100	0.5	1	1	0.5	0.5	0.5	1
Bhaga_1	6907901	6908000	0.5	0.5	0.5	1	0.5	1	1
Bhaga_1	6909101	6909200	1	0.5	0.5	0.5	1	0.5	1
Bhaga_1	6911001	6911100	1	0.5	1	0.5	1	0.5	0.5
Bhaga_1	6915801	6915900	1	0.5	0.5	0.5	1	1	1
Bhaga_1	6921601	6921700	0.5	1	1	0.5	1	1	0.5
Bhaga_1	6930801	6930900	1	1	0.5	1	1	0.5	0.5
Bhaga_1	6936501	6936600	0.5	0.5	0	0	0	0	0.5
Bhaga_1	6941301	6941400	0.5	0	0.5	0	0	0.5	0
Bhaga_1	6956001	6956100	0.5	1	1	0.5	0.5	1	1
Bhaga_1	6958901	6959000	0.5	1	1	0.5	0.5	1	0.5
Bhaga_1	6964101	6964200	0	0	0.5	0.5	0	0	0.5
Bhaga_1	6985001	6985100	0.5	0	0	0	0.5	0.5	0.5
Bhaga_1	6992601	6992700	0.5	1	0.5	1	0.5	1	1
Bhaga_1	7000101	7000200	1	1	1	0.5	0.5	0.5	0.5
Bhaga_1	7000601	7000700	1	0.5	0.5	1	0.5	1	1
Bhaga_1	7003901	7004000	0	0.5	0.5	0.5	0	0	0.5
Bhaga_1	7006601	7006700	0.5	0.5	1	1	0.5	0.5	1
Bhaga_1	7018601	7018700	0.5	1	1	0.5	0.5	1	1
Bhaga_1	7049201	7049300	0.5	1	0.5	1	0.5	1	0.5
Bhaga_1	7072401	7072500	1	1	1	0.5	0.5	0.5	1
Bhaga_1	7073201	7073300	1	1	1	0.5	0.5	1	0.5
Bhaga_1	7075001	7075100	0.5	0.5	1	0.5	1	1	1
Bhaga_1	7077601	7077700	0.5	1	1	0.5	0.5	1	1
Bhaga_1	7087101	7087200	0.5	0.5	1	0.5	0.5	1	1
Bhaga_1	7098001	7098100	1	0.5	0.5	0.5	1	1	1
Bhaga_1	7119101	7119200	0.5	0.5	0.5	0	0.5	0	0
Bhaga_1	7121401	7121500	0.5	0.5	1	0.5	1	1	1
Bhaga_1	7125501	7125600	0.5	0	0	0.5	0	0.5	0.5
Bhaga_1	7125901	7126000	1	0.5	0.5	1	1	1	0.5
Bhaga_1	7134101	7134200	1	1	0.5	1	0.5	0.5	0.5
Bhaga_1	7141101	7141200	0.5	1	1	0.5	1	1	0.5
Bhaga_1	7141201	7141300	0.5	1	0.5	0.5	1	1	1
Bhaga_1	7141801	7141900	0.5	1	1	0.5	1	1	0.5
Bhaga_1	7149801	7149900	0.5	0	0	0.5	0.5	0	0.5
Bhaga_1	7156601	7156700	0	0	0	0.5	0	0.5	0.5
Bhaga_1	7161001	7161100	1	1	0.5	1	0.5	0.5	0.5
Bhaga_1	7175801	7175900	1	0.5	0.5	0.5	1	1	0.5
Bhaga_1	7179901	7180000	0	0.5	0	0.5	0	0.5	0.5
Bhaga_1	7183201	7183300	0.5	0.5	0.5	1	1	0.5	1
Bhaga_1	7188401	7188500	0.5	0.5	0.5	0.5	0	0	0
Bhaga_1	7194601	7194700	1	0.5	0.5	1	1	0.5	0.5
Bhaga_1	7199501	7199600	1	1	0.5	0.5	1	0.5	0.5
Bhaga_1	7199701	7199800	0.5	1	0.5	1	0.5	0.5	1
Bhaga_1	7199801	7199900	1	0.5	1	1	0.5	0.5	1
Bhaga_1	7207601	7207700	0.5	0.5	1	1	0.5	1	1
Bhaga_1	7210501	7210600	0.5	0	0.5	0.5	0.5	0	0
Bhaga_1	7244501	7244600	0	0	0	0.5	0	0.5	0.5
Bhaga_1	7244601	7244700	0	0	0	0.5	0	0.5	0.5
Bhaga_1	7244701	7244800	0	0	0	0.5	0	0.5	0.5
Bhaga_1	7245801	7245900	0.5	0.5	0.5	1	1	1	1
Bhaga_1	7250301	7250400	0.5	0.5	0.5	1	1	1	1
Bhaga_1	7251001	7251100	0.5	0.5	0.5	1	1	0.5	1
Bhaga_1	7260201	7260300	0.5	0	0.5	0	0.5	0	0
Bhaga_1	7260301	7260400	0.5	0	0.5	0	0.5	0	0
Bhaga_1	7261301	7261400	0.5	1	0.5	1	1	0.5	1
Bhaga_1	7263701	7263800	0.5	0.5	1	1	0.5	1	1
Bhaga_1	7265001	7265100	0	0.5	0.5	0	0	0.5	0
Bhaga_1	7265201	7265300	0	0.5	0.5	0	0	0.5	0
Bhaga_1	7270901	7271000	1	1	0.5	1	0.5	0.5	0.5
Bhaga_1	7271001	7271100	1	1	0.5	1	0.5	0.5	0.5
Bhaga_1	7271101	7271200	1	1	0.5	1	0.5	0.5	0.5
Bhaga_1	7298301	7298400	1	1	1	0.5	0.5	0.5	0.5
Bhaga_1	7302301	7302400	0	0.5	0	0	0.5	0.5	0
Bhaga_1	7304101	7304200	0.5	0.5	1	0.5	0.5	1	1
Bhaga_1	7304601	7304700	0.5	1	0.5	1	0.5	1	0.5
Bhaga_1	7305501	7305600	0.5	0.5	1	1	0.5	1	1
Bhaga_1	7305601	7305700	0.5	0.5	1	1	0.5	1	1
Bhaga_1	7306001	7306100	0.5	1	1	0.5	0.5	0.5	1
Bhaga_1	7312701	7312800	0.5	1	1	0.5	0.5	1	1
Bhaga_1	7315501	7315600	1	1	1	0.5	0.5	0.5	0.5
Bhaga_1	7318001	7318100	0.5	1	0.5	1	0.5	1	0.5
Bhaga_1	7318101	7318200	0.5	0.5	1	1	1	0.5	0.5
Bhaga_1	7327001	7327100	1	0.5	0.5	1	1	0.5	0.5
Bhaga_1	7332001	7332100	0.5	0	0.5	0	0	0.5	0.5
Bhaga_1	7334701	7334800	0.5	1	0.5	0.5	1	0.5	1
Bhaga_1	7348401	7348500	1	1	1	0.5	1	0.5	0.5
Bhaga_1	7357101	7357200	0	0.5	0.5	0.5	0	0	0
Bhaga_1	7357201	7357300	0	0.5	0.5	0.5	0	0	0
Bhaga_1	7366001	7366100	0.5	0.5	1	1	1	0.5	0.5
Bhaga_1	7366201	7366300	1	1	0.5	0.5	1	0.5	1
Bhaga_1	7368001	7368100	1	0.5	1	0.5	1	0.5	1
Bhaga_1	7368201	7368300	0.5	0.5	1	0.5	1	1	1
Bhaga_1	7374801	7374900	1	1	1	0.5	1	0.5	0.5
Bhaga_1	7381601	7381700	1	0.5	0.5	1	1	0.5	1
Bhaga_1	7386601	7386700	0.5	0.5	0.5	0	0.5	0	0
Bhaga_1	7390301	7390400	0.5	0	0	0	0.5	0.5	0.5
Bhaga_1	7393001	7393100	0	0	0.5	0.5	0.5	0	0
Bhaga_1	7397801	7397900	0.5	0.5	0	0.5	0.5	0	0
Bhaga_1	7405601	7405700	0.5	0.5	0.5	1	1	1	1
Bhaga_1	7409501	7409600	1	1	1	0.5	0.5	0.5	1
Bhaga_1	7412001	7412100	0.5	1	1	1	0.5	1	0.5
Bhaga_1	7431601	7431700	1	0.5	0.5	1	1	0.5	1
Bhaga_1	7436901	7437000	0.5	0.5	0	0	0.5	0.5	0
Bhaga_1	7437301	7437400	1	0.5	1	0.5	0.5	1	1
Bhaga_1	7448801	7448900	1	0.5	1	1	1	0.5	0.5
Bhaga_1	7450501	7450600	1	1	0.5	1	1	0.5	0.5
Bhaga_1	7465501	7465600	1	1	1	0.5	0.5	0.5	0.5
Bhaga_1	7467501	7467600	1	1	1	0.5	0.5	0.5	1
Bhaga_1	7476601	7476700	1	0.5	1	0.5	0.5	1	0.5
Bhaga_1	7478901	7479000	0.5	0	0.5	0.5	0.5	0	0
Bhaga_1	7479301	7479400	0.5	0	0.5	0	0.5	0.5	0
Bhaga_1	7480301	7480400	0	0	0.5	0.5	0.5	0.5	0
Bhaga_1	7480401	7480500	0.5	0	0	0.5	0	0	0.5
Bhaga_1	7480501	7480600	0.5	0	0	0.5	0	0.5	0.5
Bhaga_1	7486401	7486500	0.5	0.5	1	1	1	0.5	1
Bhaga_1	7492401	7492500	1	1	0.5	0.5	1	0.5	1
Bhaga_1	7494601	7494700	1	0.5	0.5	1	1	0.5	1
Bhaga_1	7496001	7496100	1	0.5	0.5	1	0.5	1	1
Bhaga_1	7496101	7496200	0.5	0.5	1	1	0.5	1	1
Bhaga_1	7499701	7499800	0.5	0.5	0.5	1	1	0.5	1
Bhaga_1	7499801	7499900	0.5	0.5	0.5	1	0.5	1	1
Bhaga_1	7512001	7512100	0.5	1	1	0.5	1	1	0.5
Bhaga_1	7522901	7523000	1	1	0.5	0.5	1	1	0.5
Bhaga_1	7523001	7523100	1	1	0.5	0.5	1	1	0.5
Bhaga_1	7525001	7525100	1	0.5	0.5	1	1	0.5	1
Bhaga_1	7526901	7527000	0.5	1	0.5	0.5	1	1	1
Bhaga_1	7532101	7532200	0.5	1	0.5	1	0.5	0.5	1
Bhaga_1	7534201	7534300	1	1	1	0.5	0.5	1	0.5
Bhaga_1	7535001	7535100	1	1	0.5	0.5	0.5	1	1
Bhaga_1	7540401	7540500	1	0.5	0.5	1	0.5	1	1
Bhaga_1	7546601	7546700	0.5	1	0.5	1	1	0.5	0.5
Bhaga_1	7547101	7547200	0.5	0.5	0.5	1	0.5	1	1
Bhaga_1	7549201	7549300	0	0	0.5	0.5	0	0.5	0
Bhaga_1	7557201	7557300	0.5	0	0	0.5	0	0.5	0.5
Bhaga_1	7564301	7564400	0.5	0.5	0.5	1	1	1	0.5
Bhaga_1	7570501	7570600	1	0.5	1	0.5	0.5	0.5	1
Bhaga_1	7574301	7574400	1	0.5	0.5	1	0.5	1	0.5
Bhaga_1	7574401	7574500	1	0.5	0.5	1	0.5	1	0.5
Bhaga_1	7575901	7576000	1	1	0.5	0.5	0.5	1	0.5
Bhaga_1	7578201	7578300	1	1	0.5	1	0.5	0.5	1
Bhaga_1	7579201	7579300	0.5	0	0.5	0	0.5	0.5	0
Bhaga_1	7579801	7579900	0.5	0	0	0.5	0	0.5	0.5
Bhaga_1	7587001	7587100	0.5	0.5	1	1	1	0.5	0.5
Bhaga_1	7587101	7587200	0.5	1	1	1	1	0.5	0.5
Bhaga_1	7587801	7587900	0.5	0.5	0.5	0	0.5	0	0
Bhaga_1	7587901	7588000	0.5	0	0	0	0.5	0.5	0
Bhaga_1	7590501	7590600	0.5	1	1	1	0.5	0.5	0.5
Bhaga_1	7601101	7601200	0.5	0.5	1	1	0.5	0.5	1
Bhaga_1	7602601	7602700	1	0.5	0.5	0.5	1	1	0.5
Bhaga_1	7606601	7606700	1	0.5	0.5	1	0.5	0.5	1
Bhaga_1	7614601	7614700	1	0.5	0.5	1	0.5	1	1
Bhaga_1	7629101	7629200	1	1	1	1	0.5	0.5	0.5
Bhaga_1	7636001	7636100	0	0.5	0.5	0.5	0	0	0.5
Bhaga_1	7636101	7636200	0	0.5	0	0.5	0	0	0.5
Bhaga_1	7643901	7644000	0	0.5	0	0.5	0.5	0.5	0
Bhaga_1	7664001	7664100	0	0.5	0	0.5	0	0.5	0.5
Bhaga_1	7664101	7664200	0	0.5	0	0.5	0	0.5	0.5
Bhaga_1	7664901	7665000	1	0.5	1	0.5	0.5	1	0.5
Bhaga_1	7665601	7665700	0	0.5	0	0	0.5	0	0.5
Bhaga_1	7665701	7665800	1	1	0.5	0.5	1	0.5	0.5
Bhaga_1	7678201	7678300	0.5	1	1	0.5	1	1	0.5
Bhaga_1	7682601	7682700	0	0.5	0	0.5	0	0	0.5
Bhaga_1	7687101	7687200	1	0.5	1	0.5	1	1	0.5
Bhaga_1	7687201	7687300	0.5	1	0.5	1	0.5	1	0.5
Bhaga_1	7688701	7688800	0.5	0.5	0	0.5	0	0	0.5
Bhaga_1	7694601	7694700	0	0	0	0.5	0	0.5	0.5
Bhaga_1	7696301	7696400	0	0.5	0	0	0.5	0.5	0
Bhaga_1	7696401	7696500	0	0.5	0	0	0.5	0.5	0
Bhaga_1	7700301	7700400	1	1	0.5	1	0.5	1	0.5
Bhaga_1	7700801	7700900	1	1	1	1	0.5	0.5	0.5
Bhaga_1	7700901	7701000	1	1	1	1	0.5	0.5	0.5
Bhaga_1	7701001	7701100	1	1	1	1	0.5	0.5	0.5
Bhaga_1	7701201	7701300	1	1	1	1	0.5	0.5	0.5
Bhaga_1	7702001	7702100	0.5	1	1	1	0.5	0.5	1
Bhaga_1	7702801	7702900	0.5	1	1	0.5	1	0.5	1
Bhaga_1	7705001	7705100	0	0.5	0.5	0	0	0	0.5
Bhaga_1	7706701	7706800	0.5	0.5	0	0.5	0	0.5	0
Bhaga_1	7709201	7709300	1	1	1	0.5	1	0.5	0.5
Bhaga_1	7709301	7709400	1	1	0.5	0.5	1	0.5	0.5
Bhaga_1	7709801	7709900	1	0.5	0.5	0.5	0.5	1	1
Bhaga_1	7710601	7710700	0.5	1	0.5	1	0.5	1	0.5
Bhaga_1	7720501	7720600	0	0.5	0.5	0.5	0.5	0	0
Bhaga_1	7721701	7721800	1	0.5	0.5	0.5	1	0.5	1
Bhaga_1	7739801	7739900	0.5	0.5	0.5	1	0.5	1	1
Bhaga_1	7742801	7742900	0.5	1	1	0.5	0.5	0.5	1
Bhaga_1	7747801	7747900	0.5	0.5	0	0	0	0	0.5
Bhaga_1	7748201	7748300	0	0	0.5	0	0.5	0.5	0
Bhaga_1	7757701	7757800	1	1	1	0.5	1	0.5	0.5
Bhaga_1	7757901	7758000	1	0.5	1	0.5	1	0.5	1
Bhaga_1	7758101	7758200	1	0.5	1	0.5	1	0.5	1
Bhaga_1	7759901	7760000	0.5	1	1	1	1	0.5	0.5
Bhaga_1	7764401	7764500	0	0.5	0.5	0	0.5	0	0
Bhaga_1	7766601	7766700	1	0.5	1	0.5	1	0.5	0.5
Bhaga_1	7774101	7774200	0.5	0.5	0	0	0.5	0	0
Bhaga_1	7781101	7781200	0	0.5	0.5	0.5	0	0.5	0
Bhaga_1	7781201	7781300	0	0.5	0.5	0.5	0	0.5	0
Bhaga_1	7782501	7782600	0	0	0.5	0	0	0.5	0.5
Bhaga_1	7782601	7782700	0	0	0.5	0	0	0.5	0.5
Bhaga_1	7783901	7784000	0.5	0.5	0	0	0	0.5	0
Bhaga_1	7784801	7784900	0	0	0	0.5	0.5	0	0.5
Bhaga_1	7785301	7785400	0.5	0.5	0	0	0	0.5	0.5
Bhaga_1	7785501	7785600	0.5	0.5	0	0	0	0.5	0
Bhaga_1	7785701	7785800	0.5	0.5	0	0	0	0.5	0
Bhaga_1	7787901	7788000	0	0.5	0.5	0	0.5	0.5	0
Bhaga_1	7798301	7798400	1	1	0.5	0.5	0.5	1	1
Bhaga_1	7798501	7798600	1	0.5	0.5	0.5	0.5	1	1
Bhaga_1	7799901	7800000	0	0.5	0	0	0.5	0	0.5
Bhaga_1	7800501	7800600	0.5	0.5	0	0.5	0.5	0	0
Bhaga_1	7803301	7803400	0	0.5	0.5	0	0.5	0	0.5
Bhaga_1	7813801	7813900	0.5	1	0.5	1	1	1	0.5
Bhaga_1	7828501	7828600	0.5	0.5	1	1	1	1	0.5
Bhaga_1	7829701	7829800	0	0	0.5	0	0.5	0	0.5
Bhaga_1	7853301	7853400	0.5	1	1	0.5	1	1	0.5
Bhaga_1	7862601	7862700	0	0	0.5	0.5	0	0.5	0
Bhaga_1	7862901	7863000	0.5	0.5	1	1	1	0.5	1
Bhaga_1	7865101	7865200	0.5	0.5	1	0.5	1	1	0.5
Bhaga_1	7870801	7870900	0	0.5	0	0.5	0	0	0.5
Bhaga_1	7876501	7876600	0	0.5	0	0.5	0	0	0.5
Bhaga_1	7876601	7876700	0	0.5	0	0.5	0	0	0.5
Bhaga_1	7910201	7910300	0	0	0.5	0.5	0.5	0	0
Bhaga_1	7919301	7919400	0.5	0	0	0.5	0.5	0	0.5
Bhaga_1	7924401	7924500	1	0.5	0.5	1	0.5	0.5	1
Bhaga_1	7929001	7929100	1	1	1	0.5	0.5	0.5	0.5
Bhaga_1	7929101	7929200	1	0.5	1	0.5	1	0.5	1
Bhaga_1	7929201	7929300	1	0.5	1	1	1	0.5	0.5
Bhaga_1	7929301	7929400	1	0.5	1	1	0.5	0.5	0.5
Bhaga_1	7929401	7929500	1	0.5	1	1	0.5	0.5	1
Bhaga_1	7929501	7929600	0.5	0.5	1	1	0.5	0.5	1
Bhaga_1	7942101	7942200	0.5	1	0.5	1	0.5	1	1
Bhaga_1	7942501	7942600	0.5	0	0	0.5	0	0.5	0
Bhaga_1	7947701	7947800	1	0.5	0.5	1	1	1	0.5
Bhaga_1	7967801	7967900	0.5	0.5	0.5	1	1	1	0.5
Bhaga_1	7971501	7971600	1	1	1	0.5	0.5	1	0.5
Bhaga_1	7971801	7971900	0	0.5	0.5	0.5	0	0.5	0
Bhaga_1	7980801	7980900	0.5	0.5	0.5	1	0.5	1	1
Bhaga_1	7981101	7981200	0.5	0.5	1	1	0.5	1	1
Bhaga_1	7982001	7982100	1	0.5	0.5	1	1	1	0.5
Bhaga_1	7982101	7982200	1	0.5	0.5	1	0.5	1	0.5
Bhaga_1	7991901	7992000	0	0	0.5	0.5	0	0.5	0
Bhaga_1	7992001	7992100	0	0	0.5	0.5	0	0.5	0
Bhaga_1	7992101	7992200	0	0	0.5	0.5	0	0.5	0
Bhaga_1	7992601	7992700	0.5	1	0.5	1	0.5	0.5	1
Bhaga_1	7993301	7993400	1	1	0.5	0.5	1	0.5	1
Bhaga_1	8004101	8004200	1	1	1	0.5	0.5	0.5	0.5
Bhaga_1	8008001	8008100	0	0	0.5	0	0.5	0.5	0.5
Bhaga_1	8009401	8009500	0	0	0	0.5	0.5	0	0.5
Bhaga_1	8013801	8013900	0.5	0.5	0	0.5	0	0	0
Bhaga_1	8015201	8015300	0.5	0.5	0.5	1	1	1	1
Bhaga_1	8016601	8016700	0.5	0.5	1	1	0.5	0.5	1
Bhaga_1	8022801	8022900	0.5	0	0	0	0.5	0	0.5
Bhaga_1	8030101	8030200	0.5	1	1	0.5	1	1	0.5
Bhaga_1	8030201	8030300	0.5	1	1	1	1	0.5	0.5
Bhaga_1	8035901	8036000	0	0	0.5	0	0	0.5	0.5
Bhaga_1	8036701	8036800	0.5	0.5	0.5	0	0	0	0.5
Bhaga_1	8038501	8038600	0.5	1	1	0.5	1	1	0.5
Bhaga_1	8042501	8042600	0	0.5	0.5	0	0.5	0	0.5
Bhaga_1	8050901	8051000	0.5	1	1	0.5	0.5	1	1
Bhaga_1	8051001	8051100	0.5	1	1	1	0.5	0.5	1
Bhaga_1	8067201	8067300	0.5	1	0.5	1	1	0.5	1
Bhaga_1	8074901	8075000	0	0	0.5	0.5	0.5	0	0
Bhaga_1	8078301	8078400	0	0.5	0.5	0	0	0.5	0
Bhaga_1	8078401	8078500	1	0.5	0.5	0.5	0.5	1	1
Bhaga_1	8091901	8092000	1	1	1	1	0.5	0.5	0.5
Bhaga_1	8092201	8092300	1	0.5	1	1	0.5	1	0.5
Bhaga_1	8092701	8092800	0.5	1	1	1	1	0.5	0.5
Bhaga_1	8095101	8095200	1	1	1	0.5	0.5	1	0.5
Bhaga_1	8095701	8095800	1	1	0.5	1	0.5	0.5	1
Bhaga_1	8098701	8098800	1	1	1	0.5	0.5	0.5	1
Bhaga_1	8100101	8100200	0.5	0.5	0.5	0.5	1	1	1
Bhaga_1	8104401	8104500	0.5	0	0.5	0	0.5	0.5	0
Bhaga_1	8105401	8105500	0.5	1	1	1	1	0.5	0.5
Bhaga_1	8105501	8105600	1	1	0.5	0.5	0.5	1	1
Bhaga_1	8116401	8116500	0.5	0.5	0.5	1	1	0.5	1
Bhaga_1	8116601	8116700	0.5	0.5	1	1	1	0.5	1
Bhaga_1	8116901	8117000	1	0.5	0.5	1	1	1	0.5
Bhaga_1	8132301	8132400	1	1	1	0.5	1	0.5	0.5
Bhaga_1	8144801	8144900	1	1	1	0.5	1	0.5	0.5
Bhaga_1	8148801	8148900	0.5	0	0	0	0	0.5	0.5
Bhaga_1	8158601	8158700	0	0.5	0.5	0	0.5	0	0
Bhaga_1	8159801	8159900	0	0	0	0	0.5	0.5	0.5
Bhaga_1	8160801	8160900	0.5	1	1	0.5	0.5	0.5	1
Bhaga_1	8161501	8161600	0.5	1	0.5	0.5	0.5	1	1
Bhaga_1	8162501	8162600	1	0.5	0.5	1	0.5	1	0.5
Bhaga_1	8165401	8165500	1	0.5	0.5	1	0.5	1	1
Bhaga_1	8169701	8169800	0.5	1	0.5	1	0.5	1	0.5
Bhaga_1	8169801	8169900	0.5	1	0.5	1	1	1	0.5
Bhaga_1	8170401	8170500	0.5	0	0	0.5	0.5	0.5	0
Bhaga_1	8170601	8170700	0.5	1	0.5	0.5	1	1	0.5
Bhaga_1	8171201	8171300	0.5	1	1	0.5	1	0.5	0.5
Bhaga_1	8171501	8171600	0.5	1	0.5	1	1	0.5	0.5
Bhaga_1	8182401	8182500	1	1	0.5	0.5	1	0.5	1
Bhaga_1	8198701	8198800	0.5	0.5	0.5	0	0	0	0
Bhaga_1	8198801	8198900	0.5	0.5	0.5	0	0.5	0	0
Bhaga_1	8198901	8199000	0.5	0.5	0	0	0.5	0	0
Bhaga_1	8223001	8223100	0.5	1	0.5	1	0.5	1	1
Bhaga_1	8251301	8251400	1	1	0.5	0.5	1	0.5	0.5
Bhaga_1	8251401	8251500	1	1	0.5	0.5	1	0.5	0.5
Bhaga_1	8252701	8252800	0.5	1	0.5	1	0.5	1	0.5
Bhaga_1	8253501	8253600	1	0.5	1	0.5	0.5	1	0.5
Bhaga_1	8254301	8254400	1	0.5	1	0.5	1	0.5	0.5
Bhaga_1	8255101	8255200	1	0.5	0.5	1	0.5	0.5	1
Bhaga_1	8267101	8267200	1	0.5	1	1	1	0.5	0.5
Bhaga_1	8281401	8281500	0.5	1	1	1	1	0.5	0.5
Bhaga_1	8281501	8281600	0.5	0.5	0	0.5	0	0	0
Bhaga_1	8286701	8286800	0	0	0.5	0.5	0.5	0	0.5
Bhaga_1	8289201	8289300	0.5	0.5	0	0	0	0.5	0
Bhaga_1	8293301	8293400	0.5	0	0	0.5	0.5	0	0.5
Bhaga_1	8298001	8298100	0.5	0	0.5	0.5	0	0.5	0
Bhaga_1	8298901	8299000	1	1	1	0.5	0.5	0.5	0.5
Bhaga_1	8299001	8299100	1	1	1	1	0.5	0.5	0.5
Bhaga_1	8316101	8316200	1	0.5	1	1	1	0.5	0.5
Bhaga_1	8320201	8320300	0.5	0.5	1	1	0.5	0.5	1
Bhaga_1	8324001	8324100	0.5	1	1	0.5	0.5	1	0.5
Bhaga_1	8325701	8325800	0	0.5	0	0.5	0.5	0.5	0
Bhaga_1	8329501	8329600	0	0.5	0.5	0	0	0	0.5
Bhaga_1	8331101	8331200	0.5	1	0.5	1	1	0.5	1
Bhaga_1	8339801	8339900	1	0.5	0.5	1	0.5	0.5	1
Bhaga_1	8339901	8340000	1	0.5	0.5	1	0.5	0.5	1
Bhaga_1	8357801	8357900	1	0.5	0.5	1	1	0.5	1
Bhaga_1	8357901	8358000	1	0.5	0.5	1	1	0.5	0.5
Bhaga_1	8358101	8358200	1	0.5	1	1	0.5	0.5	0.5
Bhaga_1	8358201	8358300	1	0.5	1	1	0.5	0.5	0.5
Bhaga_1	8358601	8358700	0.5	0	0.5	0.5	0	0.5	0
Bhaga_1	8358701	8358800	0.5	0	0.5	0.5	0	0.5	0
Bhaga_1	8397801	8397900	0.5	1	0.5	1	1	1	0.5
Bhaga_1	8408701	8408800	1	1	0.5	1	0.5	0.5	0.5
Bhaga_1	8408801	8408900	1	1	1	1	0.5	0.5	0.5
Bhaga_1	8419401	8419500	0.5	0.5	0	0.5	0	0.5	0
Bhaga_1	8437601	8437700	1	1	1	0.5	0.5	0.5	1
Bhaga_1	8437701	8437800	1	0.5	1	0.5	0.5	0.5	1
Bhaga_1	8451201	8451300	0.5	0.5	1	1	1	0.5	0.5
Bhaga_1	8452501	8452600	0.5	1	1	1	0.5	0.5	1
Bhaga_1	8503801	8503900	0.5	1	0.5	0.5	1	0.5	1
Bhaga_1	8504901	8505000	0.5	0.5	0.5	0.5	0	0	0
Bhaga_1	8505001	8505100	0.5	0	0.5	0.5	0	0	0
Bhaga_1	8507101	8507200	0	0	0	0.5	0.5	0	0.5
Bhaga_1	8511201	8511300	0.5	0.5	0	0	0.5	0	0.5
Bhaga_1	8511301	8511400	0.5	0.5	0	0	0.5	0	0.5
Bhaga_1	8521601	8521700	0	0.5	0.5	0.5	0	0	0.5
Bhaga_1	8528501	8528600	1	0.5	1	0.5	1	1	0.5
Bhaga_1	8531201	8531300	0	0.5	0.5	0	0.5	0	0
Bhaga_1	8556501	8556600	0.5	0.5	0.5	0	0	0	0.5
Bhaga_1	8557801	8557900	1	0.5	0.5	1	0.5	1	0.5
Bhaga_1	8559101	8559200	0.5	0	0.5	0	0	0.5	0
Bhaga_1	8563601	8563700	0.5	1	1	0.5	1	0.5	1
Bhaga_1	8572701	8572800	0	0	0.5	0	0.5	0	0.5
Bhaga_1	8581801	8581900	1	1	0.5	1	0.5	0.5	0.5
Bhaga_1	8582001	8582100	0.5	1	1	1	0.5	1	0.5
Bhaga_1	8582101	8582200	0.5	1	1	1	0.5	0.5	0.5
Bhaga_1	8582401	8582500	0.5	0.5	1	1	0.5	0.5	1
Bhaga_1	8594601	8594700	1	0.5	0.5	1	1	0.5	0.5
Bhaga_1	8597201	8597300	0.5	0.5	1	0.5	1	0.5	1
Bhaga_1	8603401	8603500	0.5	0.5	0	0	0	0.5	0.5
Bhaga_1	8612901	8613000	0.5	1	0.5	1	1	1	0.5
Bhaga_1	8626301	8626400	0.5	0.5	0.5	1	0.5	1	1
Bhaga_1	8626401	8626500	0.5	0.5	0.5	1	1	1	1
Bhaga_1	8633001	8633100	1	0.5	1	1	1	0.5	0.5
Bhaga_1	8635901	8636000	0.5	1	1	0.5	0.5	1	1
Bhaga_1	8640201	8640300	1	1	1	0.5	0.5	1	0.5
Bhaga_1	8642701	8642800	0	0.5	0.5	0	0	0.5	0.5
Bhaga_1	8643301	8643400	0.5	0	0	0.5	0	0.5	0
Bhaga_1	8657801	8657900	0	0.5	0	0.5	0	0.5	0.5
Bhaga_1	8670001	8670100	0	0.5	0	0.5	0.5	0.5	0
Bhaga_1	8678101	8678200	1	0.5	0.5	1	0.5	0.5	1
Bhaga_1	8678201	8678300	1	0.5	0.5	1	1	0.5	1
Bhaga_1	8686301	8686400	0.5	0	0	0.5	0	0.5	0.5
Bhaga_1	8687501	8687600	0	0	0	0.5	0	0.5	0.5
Bhaga_1	8700201	8700300	0	0	0.5	0.5	0	0	0.5
Bhaga_1	8704801	8704900	0.5	1	1	0.5	1	0.5	0.5
Bhaga_1	8708101	8708200	0.5	0.5	0.5	1	1	0.5	1
Bhaga_1	8713701	8713800	0.5	1	0.5	0.5	0.5	1	1
Bhaga_1	8724601	8724700	1	1	0.5	1	0.5	0.5	1
Bhaga_1	8731601	8731700	0.5	0	0.5	0	0.5	0.5	0
Bhaga_1	8731701	8731800	0.5	0	0.5	0	0.5	0.5	0
Bhaga_1	8732001	8732100	1	1	0.5	1	0.5	0.5	1
Bhaga_1	8733301	8733400	1	1	0.5	0.5	0.5	0.5	1
Bhaga_1	8745801	8745900	0.5	1	0.5	1	0.5	1	1
Bhaga_1	8761301	8761400	1	1	0.5	0.5	1	0.5	0.5
Bhaga_1	8761401	8761500	1	1	0.5	0.5	1	0.5	0.5
Bhaga_1	8777801	8777900	0.5	0.5	0.5	0	0.5	0	0
Bhaga_1	8785901	8786000	0	0.5	0.5	0.5	0.5	0	0
Bhaga_1	8786001	8786100	0	0.5	0.5	0	0.5	0	0
Bhaga_1	8793101	8793200	0.5	1	1	1	1	0.5	0.5
Bhaga_1	8798501	8798600	0	0.5	0.5	0.5	0.5	0	0
Bhaga_1	8798701	8798800	0	0.5	0.5	0.5	0.5	0	0
Bhaga_1	8798801	8798900	0	0.5	0.5	0.5	0.5	0	0
Bhaga_1	8814201	8814300	1	1	1	0.5	1	0.5	0.5
Bhaga_1	8817901	8818000	1	0.5	0.5	0.5	1	1	0.5
Bhaga_1	8819001	8819100	0.5	0	0	0	0.5	0	0.5
Bhaga_1	8820001	8820100	1	1	0.5	1	0.5	0.5	0.5
Bhaga_1	8823401	8823500	0.5	1	0.5	0.5	0.5	1	1
Bhaga_1	8827801	8827900	0.5	0.5	1	1	1	1	0.5
Bhaga_1	8831701	8831800	0	0	0	0.5	0.5	0.5	0.5
Bhaga_1	8841101	8841200	0	0	0.5	0	0	0.5	0.5
Bhaga_1	8848901	8849000	1	1	1	1	0.5	0.5	0.5
Bhaga_1	8856201	8856300	1	0.5	0.5	0.5	1	0.5	1
Bhaga_1	8856301	8856400	1	1	0.5	0.5	1	0.5	1
Bhaga_1	8857801	8857900	0.5	0.5	0.5	1	1	1	1
Bhaga_1	8859001	8859100	0	0.5	0.5	0	0	0	0.5
Bhaga_1	8868701	8868800	0.5	0	0.5	0	0	0.5	0.5
Bhaga_1	8870101	8870200	0	0	0	0.5	0	0.5	0.5
Bhaga_1	8873901	8874000	0.5	0.5	1	1	0.5	1	0.5
Bhaga_1	8874001	8874100	1	0.5	1	1	0.5	1	0.5
Bhaga_1	8877101	8877200	1	1	1	0.5	1	0.5	0.5
Bhaga_1	8881601	8881700	0	0	0.5	0.5	0	0.5	0.5
Bhaga_1	8884701	8884800	0.5	0	0.5	0.5	0	0	0
Bhaga_1	8911501	8911600	1	0.5	0.5	0.5	0.5	1	1
Bhaga_1	8911601	8911700	1	0.5	0.5	0.5	1	1	1
Bhaga_1	8913501	8913600	0	0.5	0	0.5	0.5	0.5	0
Bhaga_1	8913601	8913700	0	0.5	0	0.5	0	0.5	0.5
Bhaga_1	8921901	8922000	0	0	0.5	0.5	0.5	0.5	0
Bhaga_1	8922801	8922900	1	1	0.5	0.5	0.5	0.5	1
Bhaga_1	8932501	8932600	0.5	0.5	1	1	1	0.5	1
Bhaga_1	8933001	8933100	1	0.5	0.5	1	0.5	0.5	1
Bhaga_1	8948901	8949000	1	0.5	0.5	0.5	1	1	0.5
Bhaga_1	8951401	8951500	1	1	1	0.5	0.5	0.5	1
Bhaga_1	8951501	8951600	1	1	1	0.5	0.5	0.5	1
Bhaga_1	8970201	8970300	0.5	0.5	0.5	1	1	0.5	1
Bhaga_1	8972901	8973000	0.5	0	0.5	0	0	0.5	0
Bhaga_1	8979301	8979400	1	1	0.5	0.5	0.5	0.5	1
Bhaga_1	8979501	8979600	0.5	0.5	0.5	0.5	1	1	1
Bhaga_1	8986801	8986900	0.5	0.5	0	0	0.5	0	0
Bhaga_1	8993201	8993300	1	0.5	0.5	1	1	1	0.5
Bhaga_1	8994801	8994900	1	1	0.5	0.5	1	0.5	1
Bhaga_1	9002601	9002700	0.5	1	1	0.5	1	0.5	1
Bhaga_1	9012801	9012900	1	0.5	0.5	0.5	0.5	1	1
Bhaga_1	9021301	9021400	0.5	0.5	0.5	1	0.5	1	1
Bhaga_1	9021501	9021600	0.5	0	0	0.5	0	0.5	0.5
Bhaga_1	9049901	9050000	0.5	0	0	0	0.5	0.5	0
Bhaga_1	9050101	9050200	0.5	0	0	0	0.5	0.5	0
Bhaga_1	9057101	9057200	0.5	0.5	0	0	0	0.5	0.5
Bhaga_1	9058301	9058400	0.5	0.5	1	1	1	1	0.5
Bhaga_1	9058501	9058600	0.5	0.5	1	1	0.5	0.5	1
Bhaga_1	9058601	9058700	0.5	1	1	1	0.5	0.5	1
Bhaga_1	9061701	9061800	0	0	0	0.5	0	0.5	0.5
Bhaga_1	9074701	9074800	0	0.5	0.5	0	0	0	0.5
Bhaga_1	9077301	9077400	0.5	0	0.5	0	0.5	0.5	0
Bhaga_1	9084101	9084200	0	0	0.5	0	0	0.5	0.5
Bhaga_1	9087601	9087700	0	0	0.5	0	0.5	0	0.5
Bhaga_1	9093101	9093200	1	0.5	0.5	1	1	0.5	1
Bhaga_1	9094301	9094400	0	0	0.5	0	0	0.5	0.5
Bhaga_1	9094401	9094500	0	0	0.5	0	0	0.5	0.5
Bhaga_1	9102301	9102400	0.5	0.5	1	1	1	1	0.5
Bhaga_1	9102901	9103000	0.5	1	1	1	1	0.5	0.5
Bhaga_1	9108801	9108900	0.5	0.5	0.5	1	1	0.5	1
Bhaga_1	9119601	9119700	0.5	1	0.5	1	0.5	1	0.5
Bhaga_1	9121501	9121600	0.5	0.5	0.5	1	0.5	1	1
Bhaga_1	9122601	9122700	1	0.5	1	0.5	1	1	0.5
Bhaga_1	9138901	9139000	0.5	1	0.5	1	1	0.5	0.5
Bhaga_1	9142701	9142800	1	0.5	1	0.5	0.5	0.5	1
Bhaga_1	9145301	9145400	1	1	1	0.5	0.5	1	0.5
Bhaga_1	9146501	9146600	0.5	0	0.5	0.5	0	0.5	0
Bhaga_1	9147801	9147900	0	0.5	0	0.5	0	0	0.5
Bhaga_1	9150501	9150600	1	0.5	0.5	0.5	1	1	1
Bhaga_1	9151901	9152000	1	1	1	0.5	0.5	0.5	0.5
Bhaga_1	9152201	9152300	1	0.5	0.5	1	1	0.5	1
Bhaga_1	9157501	9157600	0.5	0.5	1	1	1	0.5	0.5
Bhaga_1	9158301	9158400	0.5	0.5	0.5	0.5	0	0	0
Bhaga_1	9158401	9158500	0.5	0.5	0.5	0.5	0	0	0
Bhaga_1	9168401	9168500	0.5	1	0.5	1	1	0.5	0.5
Bhaga_1	9168901	9169000	1	0.5	1	0.5	0.5	1	0.5
Bhaga_1	9176101	9176200	0	0	0	0.5	0	0.5	0.5
Bhaga_1	9178701	9178800	0	0	0	0.5	0.5	0	0.5
Bhaga_1	9178801	9178900	0	0.5	0	0.5	0.5	0	0.5
Bhaga_1	9178901	9179000	0	0.5	0	0.5	0.5	0	0.5
Bhaga_1	9179701	9179800	0.5	0.5	0.5	1	0.5	1	1
Bhaga_1	9182101	9182200	0.5	1	0.5	1	1	1	0.5
Bhaga_1	9198001	9198100	0.5	0	0	0	0.5	0.5	0.5
Bhaga_1	9199001	9199100	0	0.5	0	0.5	0	0.5	0
Bhaga_1	9213401	9213500	1	0.5	0.5	1	1	0.5	1
Bhaga_1	9214101	9214200	1	0.5	1	0.5	1	0.5	0.5
Bhaga_1	9215801	9215900	1	0.5	1	0.5	1	0.5	1
Bhaga_1	9216701	9216800	0.5	1	0.5	1	1	1	0.5
Bhaga_1	9218401	9218500	1	0.5	0.5	0.5	1	0.5	1
Bhaga_1	9219201	9219300	0.5	0.5	1	1	1	0.5	0.5
Bhaga_1	9221201	9221300	1	0.5	0.5	1	1	0.5	0.5
Bhaga_1	9222501	9222600	0.5	0.5	0.5	0	0	0.5	0
Bhaga_1	9234501	9234600	0.5	0.5	0.5	1	1	1	0.5
Bhaga_1	9238401	9238500	0.5	0.5	1	1	0.5	0.5	1
Bhaga_1	9238501	9238600	0.5	0.5	1	1	1	0.5	1
Bhaga_1	9238901	9239000	0.5	0	0	0.5	0.5	0.5	0
Bhaga_1	9269001	9269100	0.5	1	1	0.5	0.5	1	0.5
Bhaga_1	9271201	9271300	0.5	1	1	1	0.5	0.5	1
Bhaga_1	9284001	9284100	0.5	0.5	0.5	1	0.5	1	1
Bhaga_1	9284201	9284300	0.5	0.5	1	1	0.5	1	0.5
Bhaga_1	9286401	9286500	0.5	0.5	0.5	0	0.5	0	0
Bhaga_1	9286501	9286600	0.5	0	0.5	0	0	0.5	0.5
Bhaga_1	9299201	9299300	0.5	1	1	0.5	1	0.5	0.5
Bhaga_1	9315501	9315600	0.5	0	0	0.5	0.5	0	0.5
Bhaga_1	9317301	9317400	0.5	1	1	0.5	1	0.5	0.5
Bhaga_1	9318901	9319000	0.5	1	1	0.5	1	0.5	1
Bhaga_1	9324901	9325000	0.5	0	0.5	0	0.5	0	0.5
Bhaga_1	9336701	9336800	0	0	0.5	0	0.5	0	0.5
Bhaga_1	9337601	9337700	0.5	0.5	0	0.5	0	0	0
Bhaga_1	9344101	9344200	0.5	0	0	0	0.5	0.5	0
Bhaga_1	9346301	9346400	0	0	0	0	0.5	0.5	0.5
Bhaga_1	9347601	9347700	0.5	1	1	0.5	1	1	0.5
Bhaga_1	9350201	9350300	0.5	0	0	0.5	0.5	0	0
Bhaga_1	9352701	9352800	0	0.5	0.5	0	0.5	0	0
Bhaga_1	9353201	9353300	0	0.5	0.5	0	0.5	0	0.5
Bhaga_1	9357301	9357400	0.5	1	1	0.5	1	0.5	1
Bhaga_1	9359401	9359500	0.5	0	0.5	0	0	0.5	0
Bhaga_1	9360701	9360800	0.5	1	0.5	1	1	0.5	0.5
Bhaga_1	9363801	9363900	0.5	0	0	0	0.5	0	0.5
Bhaga_1	9365501	9365600	0.5	0	0.5	0	0	0.5	0
Bhaga_1	9366101	9366200	1	0.5	1	1	1	0.5	0.5
Bhaga_1	9366601	9366700	0.5	1	0.5	1	1	0.5	1
Bhaga_1	9371801	9371900	0	0	0.5	0.5	0	0.5	0
Bhaga_1	9376101	9376200	0	0.5	0.5	0	0	0.5	0
Bhaga_1	9379001	9379100	1	0.5	1	1	0.5	1	0.5
Bhaga_1	9390801	9390900	0	0	0.5	0.5	0.5	0	0.5
Bhaga_1	9390901	9391000	0	0	0	0.5	0.5	0.5	0.5
Bhaga_1	9393501	9393600	0.5	0.5	0	0	0	0.5	0.5
Bhaga_1	9393601	9393700	1	0.5	0.5	1	1	0.5	0.5
Bhaga_1	9401801	9401900	1	0.5	0.5	0.5	1	0.5	1
Bhaga_1	9401901	9402000	1	0.5	0.5	0.5	1	1	1
Bhaga_1	9402001	9402100	1	0.5	0.5	0.5	0.5	1	1
Bhaga_1	9405301	9405400	1	1	0.5	1	0.5	0.5	1
Bhaga_1	9409901	9410000	0.5	1	0.5	1	1	1	0.5
Bhaga_1	9410001	9410100	0.5	1	0.5	1	1	1	0.5
Bhaga_1	9416401	9416500	0.5	0	0.5	0	0.5	0	0
Bhaga_1	9425501	9425600	0.5	1	0.5	1	1	0.5	1
Bhaga_1	9428901	9429000	0.5	0.5	1	1	0.5	1	0.5
Bhaga_1	9435901	9436000	0.5	0.5	0	0	0.5	0	0
Bhaga_1	9437501	9437600	0.5	0.5	0.5	1	1	1	0.5
Bhaga_1	9439401	9439500	1	0.5	0.5	1	1	1	0.5
Bhaga_1	9442001	9442100	0.5	0	0	0	0.5	0.5	0.5
Bhaga_1	9442801	9442900	0.5	1	0.5	0.5	1	1	0.5
Bhaga_1	9443801	9443900	0	0	0	0.5	0.5	0.5	0
Bhaga_1	9448501	9448600	1	1	0.5	0.5	0.5	1	0.5
Bhaga_1	9448601	9448700	0.5	1	1	0.5	0.5	1	1
Bhaga_1	9454901	9455000	1	1	1	0.5	0.5	0.5	0.5
Bhaga_1	9464001	9464100	0	0.5	0	0	0.5	0.5	0
Bhaga_1	9465301	9465400	0	0.5	0.5	0.5	0.5	0	0
Bhaga_1	9474001	9474100	0.5	1	1	0.5	0.5	0.5	1
Bhaga_1	9474101	9474200	0.5	0.5	1	0.5	0.5	1	1
Bhaga_1	9478701	9478800	0.5	1	1	1	0.5	0.5	0.5
Bhaga_1	9479301	9479400	0	0.5	0.5	0.5	0	0	0
Bhaga_1	9482401	9482500	1	0.5	1	0.5	1	1	0.5
Bhaga_1	9483701	9483800	1	0.5	1	0.5	1	1	0.5
Bhaga_1	9484701	9484800	0.5	0.5	0.5	1	1	1	0.5
Bhaga_1	9486501	9486600	1	1	0.5	1	0.5	0.5	0.5
Bhaga_1	9488501	9488600	0.5	0.5	0.5	1	1	1	1
Bhaga_1	9492101	9492200	0.5	0.5	0.5	1	1	0.5	1
Bhaga_1	9494101	9494200	0.5	0	0.5	0.5	0	0	0
Bhaga_1	9494201	9494300	0.5	0	0.5	0.5	0	0	0
Bhaga_1	9496101	9496200	1	1	0.5	0.5	0.5	1	0.5
Bhaga_1	9498501	9498600	1	1	0.5	0.5	0.5	0.5	1
Bhaga_1	9498601	9498700	1	1	1	0.5	0.5	0.5	1
Bhaga_1	9503101	9503200	0.5	0	0.5	0	0	0	0.5
Bhaga_1	9504301	9504400	0.5	0.5	0	0.5	0.5	0	0
Bhaga_1	9504401	9504500	0.5	0.5	0	0	0	0	0.5
Bhaga_1	9505501	9505600	0.5	0.5	0.5	0	0.5	0	0
Bhaga_1	9510801	9510900	0	0.5	0	0	0	0.5	0.5
Bhaga_1	9511201	9511300	0.5	1	1	1	0.5	0.5	1
Bhaga_1	9514001	9514100	0	0.5	0.5	0	0.5	0	0.5
Bhaga_1	9514201	9514300	0	0	0	0.5	0.5	0.5	0
Bhaga_1	9514701	9514800	0.5	1	0.5	1	1	1	0.5
Bhaga_1	9517601	9517700	0	0	0	0	0.5	0.5	0.5
Bhaga_1	9533701	9533800	1	1	1	0.5	0.5	1	0.5
Bhaga_1	9533801	9533900	1	1	1	0.5	0.5	1	0.5
Bhaga_1	9535201	9535300	1	0.5	1	0.5	1	1	0.5
Bhaga_1	9536301	9536400	0.5	1	1	0.5	1	1	0.5
Bhaga_1	9537401	9537500	0.5	1	1	0.5	1	1	0.5
Bhaga_1	9539001	9539100	0	0	0	0.5	0	0.5	0.5
Bhaga_1	9540101	9540200	0.5	1	1	0.5	0.5	1	1
Bhaga_1	9543301	9543400	0.5	1	1	1	0.5	0.5	1
Bhaga_1	9544401	9544500	0.5	1	0.5	0.5	1	1	0.5
Bhaga_1	9567701	9567800	0.5	0.5	0.5	1	1	1	1
Bhaga_1	9569001	9569100	0.5	0.5	0.5	1	1	0.5	1
Bhaga_1	9569501	9569600	0.5	0.5	0.5	1	1	1	1
Bhaga_1	9573601	9573700	0.5	0.5	1	1	0.5	1	1
[truncated: 112,617 more rows]
